# Supplementary material for: Differences in and associations between belief in just deserts and human rights restrictions over a 3-year period in five countries during the COVID-19 pandemic
Source: PeerJ. 2023 Sep 28;11:e16147. doi: 10.7717/peerj.16147 (PMC10542388; doi:10.7717/peerj.16147)
Supplement: Supplemental Information 1 [file peerj-11-16147-s001.xlsx]

## Sheet: data
country	BJD1_2020	BJD2_2020	HRR1_2020	HRR2_2020	HRR3_2020	HRR4_2020	HRR5_2020	HRR6_2020	gender_2020	age_2020	academic career_2020	family_1_2020	family_2_2020	family_3_2020	BJD1_2021	BJD2_2021	HRR1_2021	HRR2_2021	HRR3_2021	HRR4_2021	HRR5_2021	HRR6_2021	gender_2021	age_2021	academic career_2021	family_1_2021	family_2_2021	family_3_2021	BJD1_2022	BJD2_2022	HRR1_2022	HRR2_2022	HRR3_2022	HRR4_2022	HRR5_2022	HRR6_2022	gender_2022	age_2022	academic career_2022	family_1_2022	family_2_2022	family_3_2022
1	5	5	7	2	7	7	7	5	1	37	4	0	1	0	2	2	4	1	5	2	6	7	1	38	4	0	1	0	1	1	6	2	7	1	6	5	1	39	4	0	1	0
1	1	1	7	1	5	1	4	1	2	32	4	1	0	0
1	1	1	7	1	1	1	1	4	1	30	3	0	0	1	1	1	5	1	3	1	1	1	1	31	3	0	0	1	1	1	4	1	1	1	1	1	1	32	3	0	0	1
1	1	2	7	6	7	5	5	2	2	30	2	1	0	0	1	1	6	3	6	3	1	1	2	31	2	1	0	0	1	1	6	2	5	1	1	1	2	32	2	1	0	0
1	4	4	6	4	2	2	4	3	1	39	2	1	0	0
1	2	2	4	4	4	4	3	3	2	33	4	0	0	1	2	2	4	4	3	3	4	4	2	34	4	0	0	1	1	1	1	2	2	2	1	1	2	35	4	0	0	1
1	3	2	5	2	3	2	3	3	2	20	2	0	0	1
1	2	2	5	4	5	4	5	4	2	51	2	0	0	1
1	2	2	6	4	5	3	5	4	2	50	3	0	1	0	3	2	6	3	5	1	3	2	2	51	3	0	1	0	3	2	6	2	3	5	3	6	2	52	3	0	1	0
1	2	2	4	4	1	1	2	3	1	29	4	0	0	1
1	1	1	7	4	6	4	6	4	2	39	3	1	0	0	4	3	6	3	4	3	5	4	2	41	3	1	0	0	2	3	4	4	4	4	4	4	2	42	3	1	0	0
1	3	3	7	4	5	3	4	4	2	34	4	0	1	0	4	4	5	4	5	3	3	5	2	35	4	0	0	1	3	3	6	3	5	3	3	4	2	36	4	0	1	0
1	2	2	7	7	6	7	6	4	2	39	3	1	0	0
1	3	3	7	5	7	2	1	2	2	31	4	1	0	0
1	4	4	7	2	7	3	3	4	1	53	3	1	0	0	3	2	6	5	6	2	4	3	1	54	3	1	0	0	4	3	6	2	6	2	4	2	1	55	3	1	0	0
1	1	1	7	6	7	7	6	5	2	33	2	0	0	1
1	3	2	2	4	1	1	6	5	2	20	2	0	0	1
1	1	2	6	2	6	3	6	3	2	26	3	0	1	0	2	2	5	2	6	2	6	4	2	27	3	0	1	0	3	2	6	4	5	2	3	4	2	28	3	0	1	0
1	3	2	4	3	5	5	3	4	2	23	2	0	0	1
1	3	2	6	6	5	3	4	4	1	33	4	0	0	1	3	2	5	2	2	3	1	2	1	34	4	0	0	1
1	1	1	6	2	2	2	2	1	2	29	2	0	0	1
1	4	3	5	4	4	3	4	2	1	36	2	0	1	0	3	2	7	4	5	4	4	2	1	38	2	0	1	0	2	2	6	2	4	4	4	2	1	39	2	0	0	1
1	3	3	4	3	4	3	3	3	2	38	3	0	0	1
1	2	2	3	4	3	4	4	4	1	45	2	0	0	1
1	1	2	6	1	5	1	1	3	2	48	3	1	0	0	1	1	5	1	3	1	1	2	2	48	3	1	0	0	2	1	5	1	3	1	2	1	2	49	3	1	0	0
1	3	2	6	2	3	5	2	2	1	65	3	0	0	1	4	4	6	3	3	3	3	5	1	66	3	0	0	1	4	3	5	3	4	3	2	4	1	64	3	0	0	1
1	4	4	7	3	5	3	4	4	2	55	3	0	0	1	3	3	6	2	5	2	3	3	2	56	3	0	0	1	2	2	4	1	2	1	1	2	2	57	3	0	0	1
1	1	3	7	1	6	3	5	2	2	29	2	0	0	1
1	2	2	6	2	3	1	2	1	1	41	4	0	0	1	2	2	6	2	4	2	2	2	1	41	4	0	0	1	1	1	4	2	3	2	2	2	1	42	4	0	0	1
1	2	3	6	2	4	3	3	3	2	30	4	0	0	1
1	2	1	6	2	4	1	2	2	1	40	2	0	1	0	2	2	5	5	6	6	5	5	1	41	2	1	0	0
1	1	1	5	5	4	3	3	4	2	32	2	1	1	0	1	1	5	3	5	3	1	2	2	33	2	1	1	0
1	2	2	7	5	3	3	2	2	2	51	3	0	1	0	3	2	7	6	4	2	2	2	2	52	3	0	1	0	2	2	6	5	2	2	2	2	2	53	3	0	1	0
1	3	2	5	5	7	6	3	1	2	32	4	0	0	1	2	1	6	4	5	3	1	2	2	33	4	0	0	1	2	1	4	1	6	1	7	1	2	34	4	1	0	0
1	3	1	6	5	3	1	5	1	2	53	4	0	0	1
1	2	1	5	3	3	2	2	2	2	32	3	1	0	0
1	4	3	6	3	6	4	5	3	2	38	4	1	0	0	2	2	6	4	5	2	3	3	2	38	4	1	0	0
1	3	4	7	7	7	5	3	3	2	36	4	1	0	0
1	5	5	6	3	6	1	4	3	2	35	4	1	0	0	4	3	6	4	6	2	5	7	2	36	4	1	0	0
1	2	2	5	5	2	2	2	2	2	38	4	1	0	0
1	4	3	7	3	4	4	2	4	2	26	4	0	0	1
1	3	3	4	5	6	3	6	4	2	23	4	0	0	1
1	2	2	5	5	2	2	1	3	2	25	4	0	0	1
1	4	4	6	1	6	1	1	1	1	41	2	0	1	0
1	2	1	6	4	6	4	4	2	2	23	3	1	0	0
1	1	2	6	3	3	4	2	2	2	25	4	1	0	0
1	2	2	4	1	4	1	3	4	2	29	4	0	0	1	3	2	4	3	3	3	2	4	2	30	4	1	0	0
1	2	1	6	1	5	1	3	3	2	35	4	1	0	0	2	2	6	1	5	1	3	3	2	36	4	1	0	0
1	2	2	7	1	6	1	1	3	2	31	4	0	0	1
1	6	6	5	5	7	3	7	2	1	36	3	0	0	1
1	3	3	6	2	4	2	3	4	2	27	4	0	1	0
1	1	1	6	1	2	3	3	1	2	33	3	0	0	1
1	1	1	1	1	1	1	1	1	1	28	3	0	0	1
1	3	3	4	4	2	2	2	4	2	24	4	0	0	1
1	2	2	6	2	3	2	1	2	2	42	4	1	0	0	2	2	6	3	5	3	3	2	2	43	4	1	0	0	2	2	4	4	5	2	2	3	2	44	4	1	0	0
1	2	3	4	1	5	1	3	3	1	31	3	0	0	1
1	2	2	6	4	5	5	4	2	1	71	2	0	0	1	2	2	5	3	5	3	4	4	1	72	2	0	0	1	2	2	6	1	3	5	1	6	1	73	2	0	0	1
1	3	2	6	2	6	2	5	4	2	31	4	1	0	0	1	1	7	1	5	4	3	4	2	32	3	1	0	0	2	2	3	5	3	4	4	3	2	33	4	1	0	0
1	1	1	7	3	7	2	6	1	2	21	4	0	1	0
1	2	2	5	4	5	5	3	4	1	50	3	1	0	0	3	4	5	4	4	4	3	4	1	51	3	1	0	0	3	3	4	4	4	4	4	4	1	52	3	0	0	1
1	1	1	6	3	6	2	5	4	1	20	4	0	0	1
1	3	3	6	1	5	1	3	1	2	38	4	0	0	1
1	2	2	6	6	7	6	3	3	1	40	4	1	0	0	2	2	5	4	5	2	1	3	1	40	4	1	0	0	2	2	7	3	6	3	2	3	1	41	4	1	0	0
1	1	1	6	1	4	4	4	2	2	39	2	1	0	0	2	2	4	1	4	3	4	4	2	40	2	1	0	0	2	2	5	1	1	1	1	1	2	41	2	1	0	0
1	2	1	5	4	4	3	3	2	1	29	4	1	0	0
1	3	2	5	2	3	1	4	1	2	39	3	0	0	1
1	3	3	4	4	4	3	4	5	1	38	4	0	0	1	3	3	5	5	5	4	4	4	1	39	4	0	0	1	4	4	4	4	6	4	3	4	1	40	4	0	1	0
1	3	3	5	1	1	1	1	1	2	33	4	0	0	1	3	3	5	2	5	2	1	3	2	34	4	0	0	1	4	4	5	1	4	1	2	4	2	35	4	0	0	1
1	3	3	6	4	6	4	5	3	2	47	3	1	0	0
1	1	1	5	1	1	1	1	1	2	41	2	0	0	1
1	4	4	6	5	5	3	5	4	2	25	2	1	0	0
1	3	3	5	4	5	4	4	4	2	30	3	1	0	0	2	2	6	4	4	3	3	3	2	31	3	1	0	0	2	2	5	4	4	4	3	4	2	32	3	1	0	0
1	4	1	6	2	5	2	2	1	2	46	4	0	0	1
1	4	5	5	5	4	3	5	5	1	20	4	0	0	1
1	1	2	7	6	5	6	4	4	2	46	3	1	0	0	1	1	6	1	1	2	4	4	2	47	3	1	0	0	1	1	6	1	4	2	4	4	2	49	3	1	0	0
1	3	3	1	1	1	1	1	1	1	57	2	0	1	0	2	2	1	1	1	1	1	1	1	58	2	0	1	0
1	1	1	7	3	6	2	3	3	2	44	4	1	0	0
1	1	1	6	6	7	5	5	4	1	32	4	0	0	1
1	1	1	5	2	3	1	5	4	2	31	4	0	0	1	2	1	5	3	5	1	1	3	2	32	4	0	0	1
1	3	3	7	1	6	1	3	4	2	40	4	1	0	0	3	3	4	4	5	3	3	1	2	41	4	1	0	0
1	2	2	5	4	4	5	5	3	2	38	4	0	0	1
1	4	3	6	6	7	5	5	5	1	36	4	0	0	1	4	3	7	5	5	5	5	5	1	37	4	0	0	1	4	4	6	5	5	4	5	2	1	38	4	0	0	1
1	2	2	7	6	7	6	7	4	2	55	4	0	0	1
1	2	2	6	3	3	2	1	3	1	35	2	0	1	0	3	3	5	2	3	2	2	2	1	36	2	0	1	0
1	4	5	6	5	5	5	4	4	2	33	3	0	0	1
1	2	2	6	2	5	2	3	3	1	40	4	0	0	1	4	4	6	3	4	3	4	3	1	40	4	0	0	1	3	3	6	3	4	3	5	3	1	40	4	0	0	1
1	1	1	6	2	1	1	2	2	2	21	4	0	0	1	4	3	6	2	3	1	1	2	2	22	4	0	0	1
1	3	3	6	3	5	3	3	3	1	31	4	0	1	0	4	4	5	5	4	4	3	3	1	32	4	0	1	0
1	1	1	5	5	4	4	3	3	2	42	2	0	0	1	2	2	4	3	4	3	3	4	2	42	2	0	0	1	3	2	4	4	4	4	4	4	2	43	2	0	0	1
1	3	3	6	2	2	1	3	5	2	21	2	0	0	1
1	2	2	5	3	1	1	1	1	2	55	4	0	0	1	1	1	5	1	2	4	2	2	2	56	4	0	1	0	3	3	5	2	3	2	2	3	2	57	4	0	1	0
1	3	3	6	2	4	1	4	1	2	48	3	0	1	0
1	2	2	5	3	2	4	2	2	1	31	2	0	0	1	2	2	5	2	3	2	3	2	1	32	2	0	0	1
1	1	1	6	6	5	3	3	3	2	33	3	0	1	0	2	1	6	3	5	2	2	4	2	34	3	0	0	1	2	3	6	4	5	3	2	3	2	35	3	0	0	1
1	3	3	4	3	3	3	3	3	2	31	3	0	1	0
1	3	2	5	5	3	3	4	2	2	32	2	0	0	1	3	3	6	3	5	3	3	2	2	33	2	0	0	1
1	2	4	4	4	4	1	2	4	3	26	1	0	1	0	2	2	7	2	4	4	4	4	3	26	1	0	1	0	4	4	7	4	4	2	4	3	3	27	1	0	1	0
1	4	3	5	2	4	2	2	3	2	44	3	0	1	0
1	4	4	5	4	4	4	4	5	1	26	2	0	0	1
1	1	1	5	1	4	5	4	7	2	38	4	1	0	0
1	3	1	6	6	5	5	5	4	2	40	3	1	0	0	2	3	5	2	5	2	3	3	2	41	3	1	0	0	2	1	6	3	4	2	4	3	2	42	3	1	0	0
1	2	2	6	1	5	1	3	4	2	48	3	0	0	1
1	1	1	6	1	6	1	1	4	2	38	3	0	1	0	2	2	6	1	3	1	1	5	2	37	3	0	1	0
1	4	4	7	3	7	5	7	7	1	35	2	1	0	0
1	2	2	6	2	5	1	3	1	1	47	3	0	1	0	1	1	6	1	3	1	1	1	1	48	3	0	1	0	2	2	5	3	4	3	3	3	1	49	3	0	1	0
1	2	2	5	2	2	2	2	5	2	41	2	0	1	0	1	1	5	2	2	2	2	3	2	42	2	0	1	0	2	2	2	1	2	1	2	1	2	43	2	0	1	0
1	2	2	6	1	6	1	1	6	2	36	4	1	0	0
1	3	3	4	4	5	3	3	4	2	28	3	0	0	1	3	3	5	4	4	4	4	3	2	29	3	0	0	1	3	3	5	4	4	3	3	2	2	30	3	0	0	1
1	1	1	5	2	1	1	1	3	2	32	1	1	0	0
1	1	2	4	1	3	1	3	2	2	35	4	1	0	0
1	4	1	6	3	5	3	3	1	2	41	3	0	0	1	4	5	7	4	5	4	2	1	2	41	3	0	1	0
1	2	2	6	6	7	6	6	4	2	32	3	0	0	1
1	4	4	5	4	5	4	5	5	1	51	4	0	0	1	4	4	5	3	5	3	4	4	1	52	4	0	0	1
1	3	3	5	4	2	5	2	3	1	43	2	0	1	0	3	3	4	3	2	3	1	3	1	45	2	0	1	0	3	2	4	6	3	3	3	4	1	46	2	0	1	0
1	1	1	6	1	5	1	3	1	2	33	3	1	0	0
1	1	2	6	1	3	2	3	1	2	30	3	0	0	1
1	5	4	7	4	7	4	4	4	2	52	2	0	0	1
1	3	3	7	5	5	5	5	2	2	36	3	1	0	0	3	2	6	3	5	4	3	3	2	37	3	1	0	0	2	3	6	4	5	4	4	4	2	38	3	1	0	0
1	2	1	5	5	2	5	5	2	2	38	4	1	0	0	5	5	7	4	5	4	6	3	2	39	4	0	0	1
1	2	2	6	3	5	3	3	4	2	44	3	0	1	0	1	1	6	2	6	2	2	3	2	45	3	0	1	0	2	2	5	2	2	2	2	3	2	46	3	0	1	0
1	2	2	6	3	5	1	4	3	1	20	2	0	1	0
1	3	3	4	4	4	4	4	4	2	43	4	0	0	1
1	1	1	6	3	3	2	4	1	2	27	3	0	0	1
1	2	2	6	1	1	1	4	1	2	42	2	0	1	0
1	2	1	4	4	5	5	6	3	1	41	4	1	0	0	2	2	4	5	6	5	5	5	1	42	4	1	0	0	2	2	4	3	3	2	6	3	1	43	4	1	0	0
1	1	1	6	4	7	3	3	1	2	29	4	0	0	1
1	2	3	5	5	5	4	4	4	2	33	4	0	1	0
1	3	3	4	3	4	4	4	4	2	26	4	0	0	1
1	2	2	6	3	4	3	3	2	2	40	3	1	0	0
1	3	3	6	2	4	2	3	4	1	42	3	1	1	0	3	3	2	1	2	1	3	2	1	43	3	1	1	0	2	2	5	2	4	2	3	4	1	44	2	1	1	0
1	4	3	5	5	4	4	4	3	2	43	3	1	0	0	3	3	5	3	5	3	4	4	2	44	3	1	0	0
1	1	1	4	1	3	1	1	6	2	26	3	0	0	1
1	3	3	5	3	5	3	3	5	2	63	3	0	0	1	2	2	5	3	3	3	3	3	2	64	3	0	0	1	3	3	4	4	4	4	2	4	2	65	3	0	0	1
1	3	2	4	4	3	3	3	3	2	26	3	0	0	1
1	2	1	6	1	2	1	3	3	1	34	1	0	1	0
1	2	1	6	3	3	5	4	3	2	30	4	0	0	1
1	1	1	6	5	5	5	5	5	2	30	3	0	0	1
1	1	1	5	4	4	3	3	3	2	35	3	1	0	0
1	3	3	6	2	5	4	4	1	2	51	4	0	0	1	3	3	6	2	5	1	2	1	2	52	4	0	0	1	2	1	6	1	5	1	4	1	2	53	4	0	0	1
1	4	4	4	4	4	4	4	4	2	24	3	0	0	1
1	4	3	6	6	7	5	6	6	2	48	3	0	1	0	2	3	6	6	6	6	1	3	2	48	4	0	0	1	4	5	6	4	5	5	1	1	2	48	4	0	0	1
1	1	1	7	1	5	2	6	2	2	39	2	0	0	1
1	1	1	6	5	6	2	6	1	2	39	3	1	0	0
1	1	1	6	1	6	6	1	4	1	38	4	0	0	1	1	4	2	2	6	2	1	3	1	45	3	0	0	1	1	2	2	1	4	2	2	1	1	46	3	0	0	1
1	2	2	6	4	5	3	4	3	1	23	4	0	1	0
1	1	1	5	2	5	4	1	2	1	39	2	0	0	1	1	1	6	4	4	3	1	1	1	40	2	0	1	0	2	2	6	4	5	3	3	3	1	41	2	0	1	0
1	3	2	6	4	6	4	5	2	2	51	3	0	0	1
1	3	3	5	3	5	2	5	3	1	54	4	0	0	1
1	3	2	6	2	4	1	5	1	2	33	2	1	0	0
1	2	2	6	1	6	1	3	2	2	30	3	0	1	0	2	2	5	4	6	4	4	3	2	31	3	0	1	0
1	2	2	6	2	5	3	2	4	2	23	4	0	0	1	2	1	2	2	1	1	3	6	2	24	4	0	0	1	2	2	1	2	1	2	4	4	2	25	4	0	0	1
1	1	1	7	2	6	1	2	4	2	32	4	0	0	1	2	2	6	5	6	5	3	3	2	33	4	0	0	1
1	1	1	6	3	3	3	3	3	2	29	4	0	0	1
1	1	1	6	1	2	1	1	2	2	24	4	0	1	0
1	1	2	3	4	3	3	1	1	2	27	4	0	0	1
1	2	2	6	1	2	1	2	4	2	28	4	0	0	1
1	1	1	7	2	5	2	1	2	2	29	4	1	0	0
1	2	2	6	2	4	1	1	3	1	38	4	1	0	0
1	1	1	3	1	4	4	7	4	1	24	4	0	0	1
1	2	3	6	3	4	3	3	2	2	31	4	1	0	0
1	2	2	6	4	3	3	7	3	2	45	3	0	0	1
1	2	1	6	1	5	1	5	4	2	36	4	0	1	0
1	2	3	6	7	5	2	5	3	2	24	4	0	0	1
1	2	2	6	3	4	4	5	4	2	25	4	0	0	1
1	2	2	7	4	7	3	2	1	2	41	3	0	0	1
1	2	2	5	1	5	1	1	2	1	28	4	0	0	1
1	2	2	6	5	5	3	1	4	2	23	3	1	0	0
1	5	4	5	4	4	6	4	6	2	59	3	0	0	1
1	3	3	6	4	6	3	3	2	2	33	2	0	0	1
1	1	1	6	1	4	4	3	3	1	51	4	0	0	1
1	2	2	6	3	5	5	2	3	2	30	4	0	0	1	4	3	5	4	4	1	3	4	2	30	4	0	0	1	2	2	6	4	4	1	1	1	2	32	4	0	0	1
1	2	2	6	5	6	5	4	2	1	63	3	0	0	1
1	2	2	4	4	3	4	3	4	2	48	3	1	0	0
1	1	1	7	2	6	3	2	2	2	26	2	0	0	1
1	3	3	5	4	4	5	4	4	2	25	4	0	0	1	4	4	6	4	5	4	4	3	2	26	4	1	0	0	3	3	5	5	3	4	3	2	2	27	4	1	0	0
1	2	3	4	5	5	2	2	4	1	32	4	0	1	0
1	1	1	7	1	6	4	6	2	2	55	3	0	0	1	1	1	7	6	7	1	7	1	2	56	3	0	0	1	2	2	7	1	7	2	7	1	2	57	3	0	0	1
1	4	3	6	3	2	3	2	4	2	20	4	0	0	1	4	3	5	2	3	2	4	3	2	21	4	0	0	1
1	2	2	4	3	5	3	3	3	1	50	4	0	0	1	5	4	2	2	3	1	2	2	1	51	4	0	0	1
1	3	1	7	6	5	4	3	3	2	28	4	0	0	1
1	3	3	5	3	4	1	5	2	2	37	3	1	0	0
1	1	2	5	3	5	3	4	2	2	39	4	0	0	1	2	2	5	1	5	5	2	2	2	40	4	0	0	1
1	4	4	5	2	5	2	2	2	2	30	4	0	0	1
1	4	4	7	5	3	3	2	2	2	22	4	0	0	1
1	1	1	7	3	5	3	3	4	2	52	4	0	1	0	1	1	7	3	4	3	2	2	2	53	4	0	1	0	1	1	7	5	5	3	3	3	2	54	4	0	1	0
1	3	2	7	1	3	4	1	1	2	26	4	0	0	1
1	3	3	5	1	4	1	2	4	2	28	4	0	0	1
1	1	1	6	5	6	5	4	4	1	30	4	0	0	1
1	2	1	5	4	3	4	4	5	2	31	2	0	0	1
1	2	2	6	4	5	3	5	3	1	39	3	0	0	1	2	2	6	6	5	4	5	5	1	40	3	0	1	0
1	3	2	6	4	5	3	2	4	2	26	2	0	0	1
1	2	2	2	1	2	2	2	5	2	23	4	0	0	1
1	3	3	6	5	3	2	2	2	2	28	4	0	0	1	2	2	6	4	5	3	2	2	2	29	4	1	0	0
1	4	4	2	3	2	2	3	5	2	31	4	0	0	1	3	3	5	3	5	4	3	4	2	31	4	0	0	1	3	3	5	4	6	4	5	4	2	32	4	0	0	1
1	2	2	6	3	5	2	6	7	2	49	4	0	1	0	1	1	2	4	1	1	1	6	2	50	4	0	0	1	1	2	1	1	1	1	1	1	2	51	4	0	1	0
1	2	2	5	3	3	3	2	4	2	37	4	1	0	0
1	1	1	5	1	3	3	1	4	2	45	2	0	0	1	3	3	4	3	6	4	4	4	2	46	2	0	0	1	4	4	1	1	1	1	1	1	2	47	2	0	0	1
1	3	3	6	3	6	2	3	2	1	30	4	0	0	1	3	3	6	2	6	2	2	2	1	30	4	0	0	1	4	4	5	4	5	3	4	3	1	30	4	0	0	1
1	1	2	6	4	7	5	6	4	2	26	3	1	0	0
1	3	3	6	3	6	3	4	3	1	29	2	0	0	1
1	2	2	6	1	4	1	4	1	1	37	4	0	1	0
1	2	1	7	1	6	1	6	4	2	40	4	1	0	0	3	3	6	6	5	4	3	5	2	41	4	1	0	0
1	5	6	5	3	5	2	2	5	2	23	4	0	0	1	5	4	5	3	5	3	3	3	2	25	4	0	0	1	5	5	5	5	5	3	3	5	2	25	4	0	0	1
1	4	4	5	4	6	3	4	4	1	38	4	0	1	0
1	2	2	4	4	4	4	4	4	2	37	3	0	1	0	3	2	6	4	4	4	4	4	2	38	3	0	1	0	3	3	6	4	4	4	4	3	2	39	3	0	1	0
1	3	3	4	4	4	3	3	4	1	44	3	1	1	0	3	3	5	4	4	4	4	4	1	45	3	1	0	0
1	1	1	7	4	3	2	2	2	1	25	4	0	0	1
1	1	2	5	3	2	4	4	3	2	33	2	1	0	0
1	2	2	5	4	4	4	4	3	2	27	4	0	0	1
1	4	3	6	3	5	3	5	3	1	34	2	0	1	0	3	3	4	3	5	4	3	3	1	35	2	0	1	0	3	3	5	4	5	3	4	3	1	36	2	0	1	0
1	4	3	6	3	4	3	3	3	1	31	4	1	0	0
1	3	3	7	3	3	1	3	2	2	24	2	0	0	1	2	2	6	3	4	4	5	1	2	25	2	0	0	1	2	1	7	1	6	1	1	1	2	26	2	0	0	1
1	4	4	2	2	2	1	3	3	2	19	4	1	0	0
1	2	2	5	3	3	3	4	5	1	39	4	0	1	0
1	1	1	7	3	5	3	2	3	2	56	3	0	0	1
1	2	2	3	3	1	3	1	4	2	31	3	0	1	0
1	1	1	5	1	4	1	3	3	2	28	4	1	0	0	3	2	6	1	4	1	5	3	2	29	4	1	0	0
1	5	3	6	4	5	5	3	3	2	45	2	0	0	1	2	2	3	4	4	4	4	4	2	46	2	0	1	0	3	2	4	4	4	4	4	4	2	47	2	0	1	0
1	3	2	6	3	7	2	3	3	2	41	2	0	0	1
1	1	3	5	4	4	4	5	4	2	40	4	0	1	0	2	2	1	1	1	1	1	1	2	41	4	0	1	0
1	3	2	4	2	3	2	3	4	2	26	3	0	0	1
1	1	1	5	4	1	1	2	1	1	27	4	0	0	1	1	1	3	3	1	1	3	1	1	28	4	0	0	1
1	4	2	6	1	3	1	3	1	1	50	2	0	0	1
1	3	3	4	1	2	1	1	1	2	36	4	0	0	1
1	6	6	7	6	7	7	7	1	1	44	1	1	0	0
1	3	3	5	3	4	2	4	3	1	35	4	0	0	1	3	2	5	2	3	3	2	3	1	36	4	0	0	1
1	4	4	5	3	2	3	2	2	1	42	2	1	0	0	2	2	6	2	1	2	2	1	1	43	2	1	0	0
1	2	1	5	1	5	1	5	6	1	28	4	0	0	1	4	1	5	1	4	2	3	4	1	29	4	0	0	1
1	2	2	5	2	4	1	2	2	2	20	4	0	0	1	2	2	6	1	4	1	2	2	2	21	4	0	0	1
1	4	4	6	3	3	2	3	3	2	43	3	0	1	0
1	2	3	6	7	5	5	6	5	2	51	4	0	0	1	4	4	5	5	6	2	3	6	2	52	4	0	0	1	2	2	2	3	5	2	3	3	2	53	4	0	0	1
1	3	3	5	5	6	6	6	5	1	41	4	1	0	0	3	2	4	6	3	6	5	3	1	42	4	1	0	0
1	4	4	6	2	4	1	2	3	2	24	4	0	0	1
1	2	2	5	3	4	1	4	3	2	40	2	1	0	0	4	4	5	3	4	3	3	4	2	41	2	1	0	0	2	4	5	4	5	3	1	5	2	42	2	1	0	0
1	2	2	5	1	5	1	4	1	2	36	3	0	0	1
1	2	2	7	6	5	4	4	3	2	28	4	1	0	0
1	2	2	6	2	5	2	4	5	2	30	4	0	0	1
1	4	3	6	2	5	2	5	3	2	28	4	0	0	1
1	2	1	7	6	4	4	4	4	2	51	2	1	0	0
1	2	2	3	3	4	3	1	5	1	34	2	0	0	1
1	1	1	6	6	6	3	5	2	1	48	4	1	0	0
1	3	3	6	3	4	3	3	3	2	40	3	0	0	1	3	3	5	4	4	4	2	4	2	41	3	0	0	1	3	4	5	3	5	3	2	4	2	42	3	0	0	1
1	3	3	7	7	7	6	5	1	1	56	4	0	0	1	3	1	5	4	6	4	2	1	1	57	4	0	0	1	3	3	4	1	3	4	2	2	1	58	4	0	0	1
1	1	2	7	5	4	5	3	3	1	29	4	0	0	1
1	1	1	5	4	5	1	1	1	2	48	4	0	0	1
1	2	2	5	4	2	3	2	2	1	28	2	0	0	1	2	2	6	4	4	2	2	3	1	29	2	0	0	1	2	2	5	4	4	3	3	2	1	30	2	0	0	1
1	2	2	5	1	3	3	2	4	1	38	3	0	0	1
1	2	2	6	3	4	3	3	4	2	26	4	0	0	1
1	3	3	6	1	5	1	4	2	2	18	2	0	0	1
1	3	3	5	3	5	4	4	2	2	42	4	1	0	0	2	2	6	3	6	4	2	4	2	43	4	1	0	0	3	3	5	4	3	3	3	2	2	44	4	1	0	0
1	2	2	6	4	4	4	2	2	1	41	4	0	1	0	3	3	6	2	4	2	2	2	1	42	4	0	0	1
1	2	2	7	5	5	3	2	1	2	23	2	0	0	1	3	3	5	3	5	3	3	2	2	23	4	0	0	1	3	3	5	3	5	2	3	2	2	24	4	0	0	1
1	2	2	4	3	3	3	3	3	1	42	4	1	0	0
1	1	1	7	1	7	6	6	3	2	35	4	1	0	0	2	2	7	3	5	3	3	2	2	36	4	1	0	0
1	3	3	6	1	6	1	1	2	1	36	3	1	0	0
1	1	1	5	4	5	3	3	3	2	55	3	0	0	1
1	4	2	6	3	6	3	6	3	2	39	4	0	0	1
1	6	6	4	4	5	1	6	3	2	33	2	1	0	0
1	1	1	7	4	5	4	6	5	2	34	2	1	0	0	2	2	2	1	4	3	1	4	2	35	2	1	0	0
1	3	3	6	5	5	2	3	3	2	26	4	1	0	0
1	1	1	5	3	5	1	2	1	2	39	4	0	1	0
1	2	2	6	4	5	5	6	5	2	41	4	1	0	0
1	1	1	6	3	2	1	3	2	1	62	4	0	0	1	1	1	6	1	1	1	1	2	1	63	4	0	0	1
1	2	2	4	4	4	3	3	2	1	31	4	0	0	1	3	2	4	4	4	4	4	4	1	32	4	0	0	1	4	3	4	4	4	4	4	4	1	33	4	0	0	1
1	4	4	6	3	5	3	4	4	2	33	2	1	0	0
1	2	2	5	5	5	4	4	4	2	41	4	1	0	0
1	2	2	6	2	3	3	3	2	2	21	2	0	0	1
1	4	4	6	2	4	4	4	2	2	33	3	0	1	0
1	4	4	5	5	5	5	4	5	1	68	2	0	0	1	4	3	5	3	5	4	3	3	1	69	2	0	1	0	3	3	5	4	5	4	3	3	1	70	2	0	1	0
1	2	2	5	3	4	3	3	4	2	58	2	0	1	0	3	2	6	3	4	3	4	4	2	59	2	0	1	0	3	3	5	4	3	3	4	4	2	60	2	0	1	0
1	3	4	6	3	4	5	2	4	1	21	4	0	0	1
1	2	1	5	4	4	4	4	4	2	40	4	1	0	0	3	3	4	4	4	3	4	4	2	41	4	1	0	0	2	2	4	3	3	3	3	3	2	42	4	1	0	0
1	2	2	5	3	5	1	4	4	2	26	3	0	0	1
1	2	2	7	6	7	5	2	2	2	65	2	0	0	1
1	2	2	4	1	4	3	2	3	1	59	4	0	1	0	1	1	3	2	2	2	1	3	1	60	4	0	1	0	2	2	6	2	3	1	1	1	1	61	4	0	1	0
1	2	2	4	4	4	4	3	4	1	28	4	1	0	0	2	1	5	4	3	4	4	4	1	29	4	1	0	0
1	2	1	7	1	5	3	1	3	2	32	4	0	0	1
1	4	3	6	4	3	4	4	2	2	48	3	1	0	0
1	1	1	7	1	4	1	3	1	2	25	4	0	0	1
1	2	1	6	3	5	3	2	2	2	39	4	1	0	0	3	2	6	3	5	3	3	4	2	40	4	1	0	0	2	2	4	1	2	2	1	3	2	41	4	1	0	0
1	3	2	6	6	7	6	5	5	2	37	2	1	0	0
1	2	2	7	4	7	7	6	4	2	36	3	0	0	1
1	2	2	6	3	5	2	2	5	2	48	3	0	1	0	2	2	6	2	4	3	3	2	2	49	3	0	1	0	3	2	5	4	4	2	1	2	2	50	3	0	1	0
1	3	2	6	4	6	6	2	2	1	41	2	1	1	0
1	3	3	7	3	6	3	3	2	2	47	3	1	1	0	3	3	4	2	2	2	2	4	2	48	3	1	1	0
1	3	3	4	4	3	3	5	3	1	49	2	1	0	0	2	3	5	5	3	4	2	3	1	50	2	0	0	1
1	6	2	5	1	1	1	1	1	3	51	1	0	1	0	5	5	6	1	1	1	1	1	3	52	1	0	1	0	5	2	5	3	1	1	1	1	3	53	1	0	1	0
1	1	1	7	1	1	1	2	3	2	34	4	0	0	1	2	2	6	1	1	1	1	1	2	35	4	0	1	0	2	1	6	1	1	1	1	1	2	36	4	0	1	0
1	2	2	5	1	3	2	1	2	1	43	2	0	1	0	1	1	5	1	4	1	2	2	1	44	2	0	1	0
1	2	1	6	1	5	1	2	1	2	41	2	0	0	1
1	5	5	6	5	6	5	4	4	2	22	2	0	0	1
1	2	2	6	4	4	4	5	3	2	24	4	1	0	0	4	4	5	3	5	3	3	3	2	25	4	1	0	0
1	3	3	4	3	4	3	4	4	2	26	4	0	0	1
1	2	2	3	3	4	3	2	4	1	38	4	0	0	1	2	3	4	4	3	4	4	4	1	39	4	0	0	1	2	2	4	3	3	5	4	3	1	40	4	0	0	1
1	4	4	6	6	6	6	3	3	2	48	2	0	1	0
1	3	3	4	4	4	1	2	1	2	24	2	1	0	0
1	3	2	5	2	5	2	5	2	2	28	4	1	1	0	3	3	5	5	1	1	2	1	2	29	4	1	1	0	1	2	3	3	3	3	2	1	2	30	4	1	1	0
1	1	1	5	2	4	3	2	1	1	39	3	0	0	1
1	2	1	7	3	5	3	6	3	2	37	2	0	1	0	2	3	6	3	3	4	3	2	2	38	2	0	1	0	2	2	6	3	6	3	3	3	2	39	2	0	1	0
1	1	1	7	1	6	1	3	2	2	35	3	1	0	0
1	2	2	6	2	6	2	4	1	1	37	4	1	0	0
1	1	1	2	6	1	1	2	2	2	28	3	1	0	0
1	2	2	4	4	3	3	2	3	1	40	4	0	0	1
1	3	1	6	1	6	4	1	6	2	55	2	0	0	1	4	1	6	1	5	5	1	1	2	56	2	0	0	1
1	2	3	5	4	1	1	2	3	2	38	4	1	0	0	2	2	6	4	1	1	1	3	2	39	4	1	0	0	2	2	5	6	2	2	1	3	2	40	4	1	0	0
1	2	1	5	4	4	3	4	3	2	23	4	0	0	1	3	3	5	4	4	4	4	4	2	24	4	0	0	1
1	2	2	5	4	6	3	3	1	2	34	3	0	1	0
1	2	2	5	4	4	4	5	4	2	30	3	1	0	0
1	1	1	4	2	3	1	2	4	2	22	3	0	0	1
1	2	2	5	4	7	3	1	2	2	18	4	1	0	0
1	1	1	5	1	4	1	1	1	2	35	4	1	0	0
1	2	2	5	2	5	3	3	3	3	27	4	0	0	1
1	1	1	7	1	4	1	1	1	1	43	2	0	1	0
1	2	2	5	1	4	1	4	2	2	31	4	0	0	1
1	1	1	6	1	4	1	3	2	3	44	4	0	1	0
1	2	1	3	1	3	1	5	1	1	21	4	0	0	1
1	3	3	4	4	2	4	1	4	2	38	4	0	1	0	3	3	5	4	5	3	4	4	2	39	4	0	1	0	3	3	6	3	3	3	1	7	2	40	4	0	1	0
1	3	3	5	3	4	4	4	4	2	40	4	1	0	0	3	3	4	4	4	3	3	3	2	41	4	1	0	0	3	3	3	3	4	3	3	3	2	42	4	1	0	0
1	4	3	5	4	5	2	3	3	2	32	4	0	0	1
1	2	2	6	2	6	3	4	5	1	66	4	0	0	1	5	4	6	2	5	2	3	3	1	66	4	0	0	1	3	2	6	2	5	5	5	4	1	67	4	0	1	0
1	4	2	7	4	5	5	4	3	2	25	4	1	0	0	4	4	6	4	3	4	3	3	2	25	4	1	0	0
1	2	2	6	4	4	1	4	3	1	48	4	0	1	0	4	3	6	1	4	1	4	4	1	49	4	0	1	0	4	4	6	1	3	1	3	5	1	50	4	0	1	0
1	2	2	3	2	5	5	2	6	1	27	4	0	0	1
1	2	2	6	3	4	3	4	3	2	31	4	1	0	0
1	2	1	6	4	7	6	3	3	2	26	4	0	0	1
1	2	2	5	1	3	1	4	4	2	26	3	0	0	1
1	1	2	5	5	5	5	5	3	2	26	3	1	1	0	4	4	6	3	7	6	6	5	2	27	3	1	0	0
1	3	3	5	4	4	3	4	4	2	41	3	0	1	0	2	3	6	4	4	4	4	3	2	42	3	0	1	0	4	4	7	4	6	3	4	3	2	43	3	0	1	0
1	5	5	6	5	5	4	4	5	2	49	3	1	0	0	5	5	7	4	4	4	4	4	2	50	3	1	0	0	5	5	6	4	4	4	4	5	2	51	3	1	0	0
1	2	3	6	4	5	6	3	2	1	53	4	0	0	1
1	2	2	7	1	6	3	1	1	2	30	2	0	0	1
1	1	1	4	4	4	4	4	4	2	41	4	0	0	1
1	1	2	4	1	2	1	3	2	2	24	4	0	0	1
1	1	1	5	1	5	1	1	1	2	29	4	0	0	1
1	2	1	5	5	3	4	1	1	2	40	2	0	0	1
1	2	2	7	3	6	3	5	3	2	34	4	0	1	0
1	2	1	6	6	2	3	5	4	1	49	4	0	1	0	1	1	6	5	5	6	6	4	1	49	4	0	1	0	4	2	6	5	6	3	3	2	1	49	4	0	0	1
1	3	3	6	5	6	4	3	6	2	28	3	0	1	0
1	2	1	3	2	3	1	5	1	2	32	3	0	0	1
1	2	2	5	3	5	4	5	3	1	21	4	0	0	1	3	2	5	3	4	3	4	4	1	22	4	0	0	1
1	2	1	5	3	5	3	3	2	2	47	4	1	0	0
1	3	3	4	4	3	3	4	3	2	26	3	0	0	1
1	5	5	6	1	1	1	1	1	1	27	1	0	0	1
1	5	5	7	5	7	7	7	5	2	26	3	1	0	0
1	2	1	6	3	5	3	3	3	1	37	3	1	0	0
1	3	2	7	4	7	5	6	2	1	27	2	0	0	1	2	2	7	4	6	4	4	3	1	28	2	0	0	1	2	3	7	1	5	1	4	1	1	29	2	0	0	1
1	1	1	3	3	3	3	3	3	1	23	4	0	0	1
1	5	5	3	5	5	4	5	5	2	22	3	1	0	0
1	2	2	4	5	4	3	3	3	2	30	2	1	0	0
1	1	1	3	3	4	4	6	3	2	38	4	1	0	0
1	2	2	6	3	6	5	4	1	2	30	4	0	0	1	1	1	7	2	6	2	2	1	2	31	4	0	0	1
1	3	4	7	7	6	6	4	4	2	29	2	0	0	1
1	2	2	5	4	5	4	4	4	2	30	4	0	0	1
1	5	4	5	2	7	5	5	1	1	22	4	0	0	1
1	2	5	5	3	5	3	5	4	1	18	3	1	0	0
1	3	3	6	4	4	4	4	5	2	62	4	0	0	1
1	4	4	5	3	4	3	4	3	1	49	4	0	1	0
1	1	1	6	2	3	2	1	3	2	25	4	0	0	1
1	1	1	6	3	4	2	4	4	2	42	4	1	0	0	1	1	7	1	2	1	1	3	2	43	4	1	0	0
1	1	1	6	4	4	2	5	5	2	40	3	1	0	0
1	1	1	6	2	4	1	1	4	1	35	4	0	0	1
1	3	2	7	3	6	4	4	6	2	35	2	0	1	0	1	1	5	4	6	4	4	2	2	36	2	0	0	1
1	5	3	7	6	7	5	7	5	2	39	2	0	0	1	3	2	7	4	5	5	7	4	2	40	2	0	0	1	2	2	7	6	5	4	4	2	2	41	4	0	1	0
1	2	2	4	3	3	3	2	1	1	26	2	0	0	1
1	1	1	5	5	4	5	4	4	1	37	2	0	1	0	2	1	4	4	4	4	4	4	1	38	2	0	0	1	3	3	3	3	3	3	3	3	1	39	2	0	1	0
1	3	3	6	4	5	3	4	3	2	51	3	0	0	1
1	1	1	6	1	3	1	3	1	2	21	4	0	0	1	2	2	5	1	1	1	1	5	2	22	4	0	0	1
1	1	1	7	4	3	1	1	1	2	41	3	1	0	0	2	1	4	3	4	4	2	2	2	42	3	1	0	0
1	2	1	6	2	5	1	2	3	2	41	4	0	1	0	2	2	4	1	2	1	2	1	2	42	4	0	1	0	2	2	5	1	2	1	2	2	2	43	4	0	1	0
1	1	1	4	1	4	1	1	3	2	31	4	0	0	1	1	1	6	1	2	1	1	1	2	32	4	0	0	1	2	2	5	1	1	1	1	4	2	33	4	0	0	1
1	1	1	5	4	2	2	3	3	2	23	2	1	0	0
1	1	1	5	2	1	2	4	5	2	29	2	0	0	1	1	1	6	4	3	3	1	3	2	30	2	0	0	1
1	3	3	2	5	5	4	2	2	1	35	3	1	0	0	4	4	5	5	5	6	2	2	1	36	3	1	0	0
1	3	4	7	3	4	3	5	1	2	40	2	0	0	1	2	2	6	4	4	4	3	2	2	41	2	0	0	1
1	2	1	6	1	3	2	2	3	2	35	3	1	1	0
1	1	1	5	5	5	5	6	4	1	31	4	0	0	1
1	2	2	3	5	5	5	3	6	2	42	3	1	0	0
1	2	2	3	1	2	1	1	1	2	22	4	0	0	1	1	1	5	3	1	3	1	1	2	23	4	0	0	1
1	2	2	6	4	5	4	2	2	2	28	3	0	0	1	2	2	4	2	6	2	3	3	2	29	3	0	0	1	3	2	3	4	4	3	4	4	2	30	3	0	0	1
1	4	4	5	4	3	3	5	5	1	25	4	0	0	1
1	2	2	4	4	3	3	3	3	2	27	2	1	0	0
1	2	2	6	1	3	4	3	4	2	28	4	1	0	0
1	1	1	6	3	3	3	2	1	1	48	3	0	1	0
1	3	3	2	2	1	2	3	4	1	35	4	0	0	1
1	1	1	1	1	3	1	2	1	2	31	4	1	0	0
1	3	2	6	2	5	1	1	2	2	46	4	1	0	0
1	1	1	3	1	3	1	3	1	1	66	2	0	0	1
1	3	3	4	4	4	4	4	4	2	40	2	1	0	0
1	4	4	7	2	5	4	6	4	1	65	4	0	1	0	4	4	6	5	6	1	3	3	1	66	4	0	1	0	4	4	6	2	5	2	5	1	1	67	4	0	1	0
1	2	2	5	3	3	2	2	3	2	28	3	0	0	1
1	2	1	4	4	1	3	1	2	2	37	2	0	0	1
1	3	3	6	4	6	4	4	4	1	38	4	0	0	1	3	2	4	4	4	3	4	1	1	39	4	0	1	0	2	2	4	4	4	3	2	1	1	40	4	0	1	0
1	1	1	6	4	5	4	4	4	2	35	2	1	0	0	5	4	7	4	6	5	3	5	2	35	2	1	0	0	1	1	7	6	6	6	5	3	2	36	2	1	0	0
1	4	3	6	2	4	2	3	2	2	44	3	1	0	0
1	1	1	6	1	5	1	2	3	2	37	3	1	0	0
1	2	2	5	1	6	1	5	1	2	24	4	0	0	1
1	2	2	6	2	5	4	1	2	1	52	4	0	0	1	3	2	5	1	2	1	1	2	1	53	4	0	0	1	2	1	2	1	2	1	1	1	1	54	4	0	0	1
1	3	3	5	4	3	2	2	3	1	43	4	1	0	0
1	2	3	6	1	1	1	2	1	2	40	4	1	0	0	2	2	6	1	4	4	1	1	2	41	4	1	0	0	3	2	7	4	2	2	2	1	2	42	4	1	0	0
1	2	2	7	7	7	6	4	5	2	34	4	1	0	0	1	1	7	6	6	5	5	2	2	35	4	1	0	0	2	1	6	7	6	5	1	1	2	36	4	1	0	0
1															4	5	5	4	5	3	3	3	1	26	4	0	0	1	3	3	4	4	4	5	5	4	1	27	4	0	0	1
1															2	2	6	5	5	5	4	4	2	37	4	1	0	0
1															2	3	7	5	6	5	6	3	2	32	4	1	0	0	3	3	4	2	5	2	4	3	2	33	4	1	0	0
1															5	4	4	4	3	5	5	5	1	32	4	0	0	1	2	2	3	4	4	5	4	3	1	33	4	0	0	1
1															3	3	4	4	3	3	4	5	1	30	4	0	0	1
1															3	2	5	1	4	3	4	2	2	30	4	0	0	1	2	3	4	1	1	1	1	2	2	31	4	0	0	1
1															2	2	4	5	4	5	4	5	1	38	1	0	0	1
1															2	1	5	3	4	3	5	4	2	18	1	0	0	1
1															3	3	5	3	5	3	3	4	1	55	4	0	1	0	3	3	4	3	4	2	2	3	1	56	4	0	1	0
1															3	3	7	4	6	5	5	4	2	21	3	0	1	0
1															1	1	7	5	7	7	6	4	2	36	3	1	0	0	1	1	7	4	6	4	5	4	2	37	3	1	0	0
1															3	3	3	5	2	4	4	3	1	33	4	0	0	1
1															4	4	4	5	5	5	4	6	1	35	4	1	1	0	4	4	4	5	4	4	4	2	1	36	4	1	1	0
1															2	2	5	5	4	4	4	4	2	26	4	0	0	1	3	2	5	5	4	4	5	4	2	27	4	0	0	1
1															2	2	5	2	3	2	2	2	2	33	4	1	0	0
1															2	2	4	4	3	3	2	2	1	48	4	0	1	0	2	2	4	3	4	2	3	3	1	49	4	0	1	0
1															1	1	6	6	1	1	7	7	1	34	4	1	0	0
1															5	4	6	4	6	3	2	5	2	34	3	1	0	0	3	3	6	3	4	3	2	4	2	35	3	1	0	0
1															3	3	4	4	4	4	4	4	2	39	3	1	0	0	3	3	5	4	4	4	4	4	2	40	3	1	0	0
1															4	4	7	3	5	5	3	5	1	32	3	0	0	1	2	3	5	2	3	1	5	5	1	33	3	0	0	1
1															3	2	5	4	4	4	2	2	1	34	4	0	1	0
1															4	5	6	2	7	1	3	4	2	26	4	0	0	1	3	2	4	2	5	3	5	4	2	27	4	0	0	1
1															2	2	5	2	3	3	2	3	1	36	4	0	0	1
1															3	1	5	2	2	2	2	1	2	35	4	1	0	0	1	1	5	2	3	2	2	2	2	36	4	1	0	0
1															4	2	6	6	6	4	4	3	2	31	4	1	0	0
1															2	2	5	5	5	4	3	3	1	36	4	0	1	0
1															4	4	3	6	2	2	2	3	1	34	4	0	0	1	2	2	4	1	1	1	3	4	1	35	4	0	0	1
1															1	1	6	2	2	2	1	1	2	34	4	0	0	1	1	2	1	1	2	1	1	1	2	35	4	0	0	1
1															1	1	4	4	1	1	1	4	1	48	2	1	0	0
1															4	4	7	4	7	7	7	4	2	31	4	0	0	1	2	2	5	3	4	2	3	3	2	32	4	1	1	0
1															4	3	5	2	4	2	3	4	1	41	4	0	1	0	3	3	5	3	4	3	3	3	1	42	4	0	1	0
1															1	1	6	1	5	2	4	2	2	25	4	1	0	0
1															2	4	4	2	4	2	1	4	1	36	2	0	0	1
1															3	3	5	3	5	4	3	4	2	27	4	1	0	0	4	3	2	3	7	3	4	3	2	28	4	1	0	0
1															3	3	5	2	5	2	2	4	2	37	4	1	0	0	3	2	4	4	3	3	3	4	2	38	4	1	0	0
1															4	5	2	1	1	1	1	2	1	42	2	0	1	0	3	3	4	1	3	1	1	4	1	43	2	0	1	0
1															1	2	1	1	1	1	1	1	1	33	2	0	0	1
1															5	4	5	2	3	2	3	2	2	28	2	0	1	0	5	5	4	2	5	3	3	3	2	29	2	0	1	0
1															3	2	5	2	5	2	2	1	1	48	2	0	1	0
1															1	1	7	1	7	4	7	4	1	34	4	0	1	0	1	1	7	1	7	1	4	4	1	35	4	0	0	1
1															5	5	7	6	7	5	4	2	2	32	3	0	0	1	6	6	6	6	7	5	6	3	2	33	3	0	0	1
1															2	2	7	2	5	1	4	1	1	37	3	0	0	1	2	2	6	2	4	1	2	1	1	37	3	0	1	0
1															2	2	5	3	5	4	4	3	2	28	4	0	0	1	2	2	6	3	4	2	3	2	2	29	4	0	0	1
1															3	2	5	4	3	4	4	5	1	41	3	0	0	1
1															4	4	5	4	4	5	4	5	1	44	4	1	0	0
1															2	2	6	5	3	3	1	5	2	33	2	1	0	0
1															2	2	5	3	5	3	2	2	2	44	4	1	0	0
1															1	1	5	1	2	1	1	2	2	23	4	0	1	0	1	1	5	1	1	1	1	2	2	24	4	0	0	1
1															3	3	4	5	4	2	4	4	1	27	2	0	0	1
1															4	4	6	4	3	4	2	4	1	30	3	0	0	1
1															4	4	4	2	5	1	3	2	2	35	4	0	0	1	2	2	4	2	5	2	1	1	2	36	4	0	0	1
1															3	3	6	5	2	1	1	1	1	39	4	0	1	0
1															1	1	2	1	2	1	1	2	1	28	4	0	1	0	2	2	4	2	3	2	2	3	1	29	4	0	1	0
1															2	3	6	3	3	1	1	3	1	36	4	1	0	0
1															2	1	7	3	6	5	2	3	2	40	2	1	0	0	2	2	6	6	4	5	2	6	2	41	2	1	0	0
1															5	5	6	5	7	5	5	5	1	41	2	0	0	1
1															3	2	5	1	1	1	4	2	1	62	4	0	0	1	3	2	4	1	4	2	3	3	1	63	4	0	0	1
1															3	3	4	4	4	4	3	4	2	31	4	0	0	1	2	3	4	4	4	4	3	2	2	32	4	0	0	1
1															2	2	6	1	6	1	2	1	1	51	2	0	1	0	2	2	6	5	5	2	4	2	1	52	2	0	1	0
1															2	1	4	4	4	1	2	4	2	54	4	0	0	1	2	1	4	1	4	1	1	2	2	54	4	0	0	1
1															2	2	6	2	5	2	2	3	2	55	4	0	1	0	3	3	6	4	4	2	3	3	2	56	4	0	1	0
1															2	2	6	3	6	3	5	5	1	59	4	0	0	1	2	2	6	4	5	4	5	5	1	60	4	0	0	1
1															3	3	4	4	4	4	4	4	1	45	3	1	0	0
1															4	3	6	1	5	1	3	1	1	40	4	0	0	1	3	2	5	1	3	1	1	2	1	41	4	0	0	1
1															2	1	6	5	4	3	3	6	2	50	4	0	0	1	2	1	6	3	4	3	3	5	2	51	4	0	0	1
1															3	3	7	4	5	3	4	4	1	40	4	0	0	1	3	3	6	4	5	3	4	3	1	41	4	0	0	1
1															3	3	2	2	2	1	2	2	1	39	4	0	0	1	3	3	4	1	2	1	3	2	1	40	4	0	0	1
1															1	2	4	4	5	4	5	4	2	34	4	1	1	0
1															2	1	2	2	1	1	1	1	2	35	4	0	0	1	2	2	4	3	1	3	1	2	2	36	4	0	0	1
1															3	3	7	7	7	7	7	4	1	44	4	0	0	1	3	3	6	5	7	6	4	4	1	45	4	0	0	1
1															2	3	6	5	5	3	5	3	1	32	2	0	1	0	2	2	6	3	5	3	2	5	1	33	2	0	1	0
1															3	3	4	2	3	3	3	2	2	34	4	0	0	1	1	1	5	2	2	2	3	2	2	35	4	0	0	1
1															4	3	6	2	3	1	4	3	1	45	2	0	1	0	4	3	6	1	2	4	1	2	1	46	2	0	0	1
1															2	1	7	6	6	5	1	5	1	44	2	0	0	1	1	1	5	6	6	6	2	5	1	45	2	0	0	1
1															2	2	5	5	6	3	4	2	2	37	4	0	0	1
1															2	2	6	4	5	2	4	3	2	37	3	1	0	0
1															3	2	4	4	4	4	4	4	2	39	4	1	0	0	4	4	5	4	5	5	5	4	2	40	4	1	0	0
1															4	3	5	5	4	5	3	2	2	42	4	1	0	0
1															2	1	6	1	2	2	1	1	2	34	2	0	1	0	3	2	7	3	2	2	2	1	2	35	2	0	1	0
1															2	2	6	2	5	2	2	2	1	42	3	1	0	0	2	2	5	4	6	3	2	3	1	43	3	1	0	0
1															3	3	4	4	4	3	3	1	2	32	2	0	0	1	4	1	2	1	1	1	1	1	2	33	2	0	0	1
1															2	2	6	3	6	3	3	3	2	44	4	1	0	0	2	2	5	3	4	3	3	3	2	45	4	1	0	0
1															3	3	6	1	3	1	2	2	2	31	2	0	1	0
1															3	2	2	2	2	1	1	1	2	47	3	0	1	0	2	2	2	1	3	1	1	1	2	48	3	0	1	0
1															2	1	6	5	2	3	4	3	1	45	2	1	0	0	2	2	5	3	5	2	2	4	1	46	2	1	0	0
1															2	2	5	4	4	3	4	4	2	23	4	0	0	1
1															2	2	6	5	3	4	4	2	2	41	4	1	0	0
1															3	4	6	2	6	3	3	1	2	50	4	0	0	1	4	4	5	4	3	2	4	3	2	51	4	0	0	1
1															2	2	5	2	4	4	4	3	2	29	2	0	1	0
1															4	4	7	5	7	3	4	4	2	29	4	0	0	1	4	4	7	3	7	3	6	4	2	30	4	0	0	1
1															4	4	6	6	6	6	2	3	2	20	4	0	0	1
1															1	1	5	4	4	2	4	4	2	48	3	0	1	0	2	2	4	4	4	4	4	4	2	49	3	0	1	0
1															2	2	4	1	2	1	2	1	2	26	4	0	0	1
1															3	3	5	3	3	2	4	3	1	26	2	0	1	0	3	3	4	4	3	3	2	3	1	27	2	0	1	0
1															4	4	5	3	4	4	3	4	2	35	4	0	0	1	4	4	4	3	4	3	4	4	2	57	4	0	0	1
1															4	2	7	2	3	2	2	5	2	39	4	0	0	1	4	3	6	2	3	2	5	5	2	40	4	0	0	1
1															2	3	5	3	4	3	5	4	1	54	4	0	0	1
1															4	4	4	4	4	4	4	5	2	41	4	0	0	1	4	4	5	4	5	5	4	4	2	42	4	0	0	1
1															2	3	4	2	3	4	1	4	2	41	3	0	1	0
1															1	1	3	1	2	1	2	2	2	44	2	1	0	0	2	1	5	1	2	1	3	2	2	45	2	1	0	0
1															1	1	4	2	2	2	2	1	2	58	2	0	1	0	1	1	4	2	4	2	2	2	2	59	2	0	1	0
1															1	1	5	4	3	2	2	1	1	33	2	0	1	0	1	1	2	2	2	1	1	4	1	34	2	0	1	0
1															2	2	4	2	3	1	4	3	1	35	4	0	1	0	2	1	2	2	3	1	2	2	1	36	4	0	1	0
1															3	3	5	4	3	3	2	3	1	20	4	0	0	1
1															3	3	5	3	4	2	4	4	1	43	4	0	1	0	3	3	5	2	4	2	3	3	1	44	4	0	1	0
1															4	4	4	4	5	5	4	4	1	33	2	0	0	1	3	3	5	4	5	3	3	6	1	34	2	0	0	1
1															2	2	5	4	6	2	2	2	1	35	4	0	0	1	1	1	5	2	3	2	2	2	1	36	4	0	0	1
1															5	3	6	1	2	3	4	3	1	28	1	0	1	0	3	1	5	3	1	1	4	5	1	29	1	0	0	1
1															1	1	5	2	5	2	4	2	1	47	2	0	1	0	1	1	5	1	5	2	2	2	1	48	2	0	1	0
1															3	2	6	3	3	3	4	4	2	53	2	0	0	1	1	1	4	2	1	1	4	4	2	54	2	0	0	1
1															1	2	4	2	5	1	4	5	1	25	4	0	0	1	2	2	5	3	4	2	4	2	1	26	4	0	0	1
1															1	1	6	3	5	2	5	2	1	53	4	0	0	1
1															2	2	3	3	4	1	1	2	1	49	4	0	1	0
1															2	1	6	2	4	2	1	2	2	46	4	1	0	0	1	1	4	1	2	1	1	1	2	47	4	1	0	0
1															1	1	3	1	1	1	1	1	2	53	4	0	1	0	1	1	2	2	1	1	1	1	2	54	4	0	1	0
1															2	2	7	1	5	1	2	2	2	53	3	0	0	1	2	2	5	1	2	1	1	1	2	54	3	0	0	1
1															5	5	6	4	3	3	3	3	1	24	4	0	0	1	5	5	5	3	2	4	3	3	1	25	4	0	0	1
1															2	2	6	1	5	1	1	2	1	69	4	0	0	1	3	2	5	3	6	3	4	4	1	70	4	0	0	1
1															3	4	4	5	5	4	3	5	1	33	4	1	0	0	3	5	3	5	5	3	5	5	1	34	4	1	0	0
1															4	4	5	2	6	4	5	3	1	45	2	0	1	0	4	4	5	2	5	3	5	3	1	46	2	0	1	0
1															1	1	5	4	5	1	3	4	1	25	2	0	0	1
1															3	2	6	4	6	1	5	3	2	31	3	1	0	0
1															2	2	6	5	6	2	2	2	1	55	2	0	0	1	2	4	7	4	6	2	3	3	1	56	2	0	0	1
1															4	4	5	4	6	3	2	4	1	31	2	1	0	0
1															1	1	6	1	1	1	1	1	2	45	4	0	0	1	2	2	4	2	2	1	1	1	2	46	4	0	0	1
1															3	3	5	1	4	1	4	1	2	44	4	0	0	1
1															3	1	5	3	4	4	3	4	2	32	2	0	0	1	3	3	4	4	4	4	3	4	2	33	2	1	0	0
1															2	2	7	1	6	1	3	4	1	39	4	0	0	1	2	1	6	2	5	1	5	3	1	40	4	1	0	0
1															2	2	5	1	2	1	2	2	2	33	4	0	1	0	2	2	4	1	2	2	3	3	2	34	4	0	1	0
1															2	2	4	1	3	1	1	1	2	40	2	0	1	0	1	1	4	1	4	1	1	1	2	41	2	0	1	0
1															2	3	6	1	2	1	2	2	2	52	4	0	0	1	2	2	6	1	2	1	2	1	2	53	4	0	0	1
1															1	1	3	5	4	3	3	2	2	32	2	0	0	1	2	1	5	4	1	1	1	3	2	33	2	0	0	1
1															6	6	7	7	1	1	1	7	1	40	4	0	1	0
1															2	2	7	4	5	2	5	3	2	31	4	0	1	0
1															2	2	4	4	4	3	3	5	1	26	2	0	1	0	2	2	4	4	2	2	2	4	1	27	2	0	1	0
1															2	2	6	2	3	2	2	5	2	31	4	0	0	1
1															3	4	6	6	6	5	5	5	2	58	4	0	1	0
1															3	3	6	1	7	1	1	1	1	59	4	0	0	1	4	4	7	1	7	6	7	6	1	59	4	0	0	1
1															3	3	6	2	5	1	2	3	2	42	2	0	1	0	2	2	4	3	4	2	5	4	2	43	2	0	1	0
1															2	1	5	2	4	1	3	4	1	34	4	0	0	1	2	1	5	3	4	2	3	3	1	35	4	0	0	1
1															3	3	6	3	6	2	4	4	2	29	1	0	0	1	3	2	6	3	4	2	4	4	2	30	1	0	0	1
1															2	2	5	5	3	3	3	5	2	40	4	1	0	0	2	2	3	3	3	4	1	6	2	41	4	1	0	0
1															3	3	5	3	4	3	3	3	2	51	3	0	0	1
1															1	1	6	2	4	1	3	3	1	40	2	1	0	0
1															4	4	5	5	6	5	4	4	1	48	4	1	0	0	5	5	6	2	7	3	3	4	1	49	4	1	0	0
1															1	1	5	3	5	2	2	2	1	49	4	1	0	0	3	2	5	3	6	3	3	3	1	50	4	1	0	0
1															4	3	3	1	3	2	3	3	2	36	4	0	0	1
1															2	2	7	6	6	7	3	2	2	31	2	0	0	1	2	2	6	4	6	6	5	3	2	32	2	0	0	1
1															2	2	7	4	7	3	3	3	2	47	3	1	1	0	2	2	6	5	6	6	5	4	2	48	3	1	1	0
1															3	3	6	2	4	2	2	2	2	37	2	0	1	0	3	3	6	2	5	2	2	1	2	38	2	0	1	0
1															1	1	4	1	1	1	1	4	2	33	3	1	0	0	1	1	1	5	2	1	1	2	2	34	3	1	0	0
1															1	1	5	1	2	1	2	3	1	64	4	0	0	1	2	2	5	3	5	3	3	4	1	65	4	0	0	1
1															4	2	4	2	4	2	2	2	1	52	4	1	1	0	1	1	5	2	4	2	2	3	1	54	4	1	0	0
1															4	5	5	5	6	5	5	6	1	44	3	1	0	0	4	4	4	6	6	5	5	3	1	28	4	1	0	0
1															3	3	7	6	6	1	4	4	1	40	4	0	0	1	3	3	6	3	5	1	2	4	1	41	4	0	0	1
1															3	3	5	1	3	2	2	2	2	45	3	0	1	0
1															3	3	6	2	5	3	4	3	2	26	4	0	0	1
1															3	3	6	2	4	2	2	3	1	44	4	0	1	0	3	3	6	5	4	4	4	5	1	45	4	0	1	0
1															4	4	6	4	6	4	4	4	2	33	4	0	0	1
1															2	3	6	4	5	3	3	4	2	35	3	1	0	0
1															2	2	7	1	4	1	1	1	2	54	3	0	0	1
1															3	3	5	5	6	4	3	3	2	34	4	0	0	1
1															1	1	5	3	4	1	3	4	1	45	4	0	0	1	1	1	4	1	4	1	2	5	1	46	4	0	0	1
1															2	3	6	2	5	2	2	4	1	45	2	0	0	1	3	3	4	4	4	3	3	4	1	46	2	0	0	1
1															2	2	5	2	5	2	2	1	2	29	3	0	0	1	4	2	5	6	6	7	6	5	2	31	4	1	0	0
1															3	2	6	1	5	1	1	1	1	51	4	1	0	0
1															2	2	5	4	4	4	4	3	1	45	3	0	1	0
1															1	1	4	2	2	1	1	1	2	56	3	0	0	1	1	1	5	1	2	1	1	1	2	57	3	0	0	1
1															1	1	6	3	6	6	5	3	2	41	3	0	1	0	4	1	4	4	6	4	5	3	2	42	3	0	1	0
1															4	4	7	5	7	6	7	5	1	54	3	0	0	1	5	5	7	7	7	7	7	5	1	55	4	0	0	1
1															1	1	6	4	4	2	3	4	2	30	2	0	0	1
1															3	3	5	3	4	3	2	3	2	47	3	0	1	0	2	2	5	3	3	2	2	1	2	48	3	0	1	0
1															4	4	7	1	7	1	1	1	2	51	2	0	0	1
1															2	2	7	1	2	1	1	2	1	53	4	0	0	1	2	2	6	1	3	1	1	1	1	54	4	0	0	1
1															3	2	6	3	5	3	2	2	2	51	3	0	0	1	4	2	7	3	3	3	2	1	2	52	3	0	0	1
1															2	2	6	4	2	1	1	3	1	32	4	1	0	0
1															6	6	5	1	7	1	1	1	2	49	4	1	1	0
1															1	1	4	1	1	1	1	4	1	70	4	0	1	0	3	3	6	1	4	2	1	6	1	71	4	0	1	0
1															6	6	7	7	7	1	1	1	2	44	4	1	0	0
1															2	2	6	4	1	3	1	2	2	47	2	0	1	0	3	2	4	3	2	3	2	2	2	48	2	0	1	0
1															1	1	5	2	5	4	4	3	2	31	4	1	0	0	1	1	5	3	4	4	3	3	2	32	4	1	0	0
1															2	1	6	3	5	5	5	4	2	42	4	1	0	0	2	2	6	4	4	2	3	3	2	43	4	1	0	0
1															3	2	6	3	5	2	3	2	1	64	4	0	0	1	2	2	6	2	5	2	2	2	1	65	4	0	0	1
1															1	1	5	3	5	1	3	1	1	44	2	0	1	0	1	1	6	3	5	3	3	3	1	45	2	0	1	0
1															2	1	4	4	4	4	4	4	1	47	2	0	1	0
1															1	1	6	1	3	1	4	2	2	49	2	0	0	1	1	1	6	2	2	1	2	2	2	50	2	0	0	1
1															3	3	5	1	3	1	3	3	2	36	2	0	1	0	2	2	6	2	4	1	3	4	2	37	2	0	1	0
1															3	3	5	4	4	4	4	3	1	50	3	1	1	0	4	3	5	3	2	2	2	2	1	50	3	0	0	1
1															2	2	7	4	6	3	5	5	2	27	4	0	0	1	2	2	6	4	4	3	6	4	2	28	4	0	0	1
1															1	1	4	1	1	1	4	4	2	34	2	1	0	0	2	1	4	2	3	4	2	4	2	35	2	1	0	0
1															4	4	3	1	2	1	3	4	1	37	4	0	0	1
1															1	2	6	2	3	3	2	2	2	47	3	1	0	0	2	2	5	2	4	3	2	2	2	48	3	1	0	0
1															3	3	6	1	3	1	2	1	1	39	4	0	1	0	3	2	2	1	2	1	3	1	1	40	4	0	1	0
1															4	3	4	2	5	1	3	3	2	53	4	0	0	1	3	3	2	2	4	2	3	2	2	54	4	0	0	1
1															4	5	4	2	1	1	2	1	1	32	4	0	1	0
1															3	3	5	4	3	3	2	4	1	43	3	0	0	1	2	2	4	3	4	3	3	4	1	44	3	0	0	1
1															2	5	6	1	5	2	2	6	1	62	2	0	0	1	2	2	5	2	1	1	3	4	1	63	2	0	0	1
1															2	1	7	2	5	1	5	5	1	42	4	1	0	0	1	2	5	1	3	1	3	5	1	43	4	1	0	0
1															1	1	7	2	1	2	5	6	2	40	4	1	0	0	1	1	5	5	1	1	1	7	2	42	3	1	0	0
1															2	2	7	2	4	3	5	4	1	36	4	0	0	1	2	2	6	3	5	3	4	3	1	37	4	0	0	1
1															3	3	6	6	6	5	6	4	1	37	4	1	0	0	2	2	6	3	5	2	2	4	1	38	4	1	0	0
1															3	3	7	5	7	7	2	7	2	36	3	1	0	0	1	1	6	3	1	2	1	1	2	37	2	1	0	0
1															4	4	5	6	4	5	1	5	2	39	2	1	0	0	1	1	7	6	2	2	1	1	2	40	3	1	0	0
1															3	3	4	2	4	2	2	3	1	25	4	0	0	1	3	3	5	4	4	3	4	4	1	26	4	0	0	1
1															2	2	6	4	4	3	4	3	2	29	3	0	0	1	2	2	4	3	3	3	4	4	2	30	3	0	0	1
1															3	2	6	3	5	3	5	4	2	31	4	1	0	0	3	2	3	2	5	2	3	3	2	32	4	1	0	0
1															2	2	5	1	2	1	2	2	2	36	2	0	0	1	2	2	5	1	4	1	2	3	2	37	2	0	0	1
1															2	2	2	1	2	1	2	1	2	29	4	0	0	1
1															4	4	6	3	4	4	5	3	2	42	3	1	0	0	2	2	5	4	3	4	3	3	2	43	3	1	0	0
1															5	5	6	1	6	1	1	1	1	50	4	0	1	0	4	4	6	1	4	1	2	1	1	51	4	0	1	0
1															3	3	7	3	4	4	5	4	2	32	4	0	0	1
1															3	2	6	2	5	1	3	1	2	46	4	0	1	0	2	2	5	3	4	2	2	2	2	47	4	0	1	0
1															1	1	5	3	4	3	3	2	2	33	3	0	0	1	3	3	3	4	2	3	1	5	2	34	3	0	0	1
1															3	3	5	2	4	2	3	3	2	33	4	1	0	0
1															2	3	5	1	6	1	2	1	1	33	4	0	1	0	2	2	6	1	6	1	3	1	1	34	4	0	1	0
1															2	4	4	5	2	3	3	5	1	44	2	0	0	1	4	3	4	3	4	5	3	3	1	44	2	0	0	1
1															3	3	6	3	4	2	3	2	1	54	4	0	0	1	3	3	5	3	4	3	3	3	1	55	4	0	0	1
1															1	1	6	3	4	3	6	4	2	61	3	0	1	0
1															6	6	7	7	7	5	6	6	2	36	3	0	0	1	5	5	7	6	6	6	6	5	2	36	3	0	0	1
1															1	1	5	3	5	4	5	5	2	42	2	1	1	0
1															3	3	4	4	4	3	3	3	1	53	4	0	0	1	2	2	4	4	4	3	3	4	1	54	4	0	0	1
1															2	1	5	4	4	3	3	4	2	30	4	1	0	0
1															3	3	6	3	5	2	3	4	2	41	2	0	1	0	3	2	6	4	6	3	4	3	2	42	2	0	1	0
1															1	1	5	4	2	2	1	4	2	37	4	1	0	0	1	1	2	4	2	2	3	7	2	38	4	1	0	0
1															2	2	5	3	1	3	1	1	2	39	3	0	0	1
1															1	1	5	3	6	1	4	1	1	50	3	0	0	1
1															3	3	7	7	5	5	3	3	1	34	3	1	0	0
1															4	4	5	2	5	3	3	2	1	37	4	0	1	0
1															3	3	4	2	4	2	1	2	2	23	4	0	0	1
1															2	1	7	1	5	1	5	2	2	39	4	1	0	0	4	1	6	2	4	1	2	5	2	40	4	1	0	0
1															3	2	5	2	3	3	3	4	2	42	4	1	1	0	2	2	4	4	2	4	2	4	2	43	4	1	1	0
1															1	1	7	2	3	3	1	2	2	54	4	0	0	1	1	2	5	2	2	3	1	1	2	55	4	0	0	1
1															2	2	7	1	6	2	2	3	2	38	2	0	0	1
1																													3	3	5	4	4	4	4	4	2	60	2	0	1	0
1																													2	2	4	2	4	2	4	4	2	34	4	1	0	0
1																													4	3	4	1	2	1	1	2	2	31	3	0	0	1
1																													3	3	4	4	4	4	3	3	2	34	4	0	0	1
1																													2	2	3	2	2	3	2	2	1	53	4	0	1	0
1																													4	4	4	5	6	4	5	4	1	46	4	0	0	1
1																													3	3	6	3	3	3	3	4	2	28	4	0	0	1
1																													3	3	5	3	4	4	4	3	2	38	2	0	0	1
1																													3	3	4	4	3	3	3	4	1	30	4	0	0	1
1																													2	2	5	4	3	3	4	4	2	35	4	0	0	1
1																													4	3	5	4	5	4	3	4	1	40	4	1	1	0
1																													3	1	5	4	3	4	2	2	2	41	3	0	0	1
1																													2	1	6	1	5	4	1	1	3	31	2	0	0	1
1																													5	4	5	4	5	4	5	6	2	35	3	0	0	1
1																													5	5	5	4	2	4	5	3	2	24	4	0	0	1
1																													5	5	4	4	4	5	3	4	3	32	4	0	0	1
1																													2	2	1	1	1	1	1	1	1	41	4	1	0	0
1																													1	3	3	4	1	2	4	4	2	33	1	0	0	1
1																													3	3	4	4	4	3	3	3	2	42	2	1	0	0
1																													2	1	4	4	4	4	4	4	2	37	2	0	1	0
1																													1	1	4	1	1	1	1	4	2	28	3	0	0	1
1																													4	5	5	5	4	4	3	3	1	36	4	0	1	0
1																													3	2	4	4	5	4	5	4	2	22	4	0	0	1
1																													3	3	6	2	3	2	1	2	2	43	4	0	0	1
1																													3	3	4	3	4	3	4	4	1	41	4	0	1	0
1																													5	6	7	4	5	5	4	4	1	35	4	1	0	0
1																													1	1	5	2	2	2	2	2	2	38	4	1	0	0
1																													3	3	4	3	3	1	3	4	1	45	3	1	0	0
1																													2	2	5	5	6	3	3	4	1	23	4	0	1	0
1																													2	2	4	2	4	1	5	2	2	35	4	0	0	1
1																													2	2	5	4	4	4	3	4	2	41	3	1	0	0
1																													3	3	6	3	4	2	3	4	1	31	4	0	1	0
1																													1	1	4	1	1	1	2	2	2	29	4	0	1	0
1																													6	6	5	4	4	5	4	4	1	33	4	0	0	1
1																													3	3	5	3	5	3	3	4	2	36	3	0	0	1
1																													5	4	5	4	5	4	4	4	2	46	2	0	1	0
1																													3	3	5	4	5	4	3	3	1	57	2	0	0	1
1																													3	3	6	4	5	4	3	4	2	34	2	1	0	0
1																													3	3	6	5	4	4	5	3	1	59	4	0	0	1
1																													2	2	4	3	4	2	3	3	2	48	4	0	0	1
1																													1	1	7	4	5	5	3	2	1	31	4	0	1	0
1																													4	4	6	6	7	5	3	3	2	50	3	1	0	0
1																													2	1	5	5	6	6	3	2	2	36	3	0	0	1
1																													3	3	5	4	5	2	3	3	2	42	4	0	0	1
1																													2	2	5	4	5	2	3	2	2	53	4	0	0	1
1																													2	2	4	2	3	2	1	5	2	38	4	1	0	0
1																													5	4	6	3	4	5	3	4	1	27	2	0	0	1
1																													4	4	4	2	4	1	1	1	1	35	2	0	0	1
1																													2	1	3	4	3	3	2	4	1	33	4	0	0	1
1																													3	3	5	2	3	2	3	5	2	33	4	1	0	0
1																													3	3	6	1	4	2	4	2	2	52	3	0	0	1
1																													4	4	5	4	5	2	5	3	2	37	4	0	1	0
1																													2	2	4	1	4	1	2	2	1	29	4	0	0	1
1																													1	1	6	2	2	1	1	1	1	48	4	0	1	0
1																													5	5	5	5	5	5	4	4	1	31	4	0	0	1
1																													4	3	7	1	3	3	3	5	2	48	3	0	0	1
1																													3	1	4	3	3	2	3	2	2	22	4	0	0	1
1																													3	3	5	2	5	2	3	3	2	56	4	0	0	1
1																													3	2	5	2	5	2	3	4	2	40	4	0	0	1
1																													2	2	6	3	5	2	5	1	2	44	2	1	1	0
1																													3	3	5	5	4	4	5	5	1	27	4	0	0	1
1																													2	2	5	2	5	2	3	5	1	37	3	0	1	0
1																													3	3	5	2	5	2	2	3	2	28	4	1	0	0
1																													2	2	1	1	1	1	1	2	2	45	4	0	0	1
1																													2	2	5	3	5	3	3	5	1	37	4	0	1	0
1																													5	6	6	6	5	5	5	5	1	45	4	1	0	0
1																													2	2	4	3	3	2	4	3	2	35	4	1	0	0
1																													2	2	5	1	1	1	1	5	1	38	3	0	0	1
1																													3	3	5	3	4	3	3	3	1	34	4	0	0	1
1																													1	1	2	1	1	1	4	6	2	38	3	0	1	0
1																													1	1	5	1	5	1	4	2	2	38	2	0	1	0
1																													1	1	4	1	2	1	1	1	1	42	4	0	1	0
1																													3	3	4	3	4	3	3	2	1	67	4	0	1	0
1																													2	4	4	3	5	3	5	3	2	47	4	1	0	0
1																													3	3	6	2	4	2	2	4	1	32	2	0	0	1
1																													4	4	7	7	7	7	7	4	1	53	2	0	0	1
1																													4	4	4	4	5	3	4	4	2	21	3	0	0	1
1																													2	1	6	2	6	1	3	3	2	49	3	1	0	0
1																													4	4	5	4	4	4	5	3	1	27	4	0	1	0
1																													3	2	5	3	4	4	4	4	2	63	2	0	1	0
1																													3	2	2	2	2	2	2	2	1	39	4	1	0	0
1																													3	2	5	1	6	1	1	1	1	51	4	0	0	1
1																													2	2	6	4	5	2	3	3	1	36	4	0	1	0
1																													3	3	6	5	4	3	3	3	2	34	4	0	0	1
1																													2	2	5	2	1	2	2	1	2	31	1	1	0	0
1																													2	2	6	1	4	1	1	1	2	53	4	0	1	0
1																													2	2	4	1	4	1	4	2	1	31	4	1	0	0
1																													2	1	6	3	3	1	1	6	2	61	4	0	1	0
1																													1	4	7	1	1	1	2	1	2	21	4	0	0	1
1																													3	3	6	1	4	1	3	2	1	32	4	0	1	0
1																													3	3	5	4	3	2	2	2	2	29	4	1	0	0
1																													3	3	5	2	3	2	3	2	2	24	4	0	0	1
1																													4	4	5	3	4	4	4	3	1	31	2	0	0	1
1																													2	2	4	3	3	2	2	2	2	48	4	1	0	0
1																													1	1	2	2	1	1	1	5	2	47	2	0	0	1
1																													2	2	6	1	1	1	1	1	2	43	2	0	0	1
1																													2	1	6	2	3	1	2	2	1	64	3	0	0	1
1																													6	6	5	5	4	4	5	7	2	33	4	0	1	0
1																													1	1	6	1	1	2	1	3	2	39	3	0	0	1
1																													2	2	5	2	3	2	2	2	1	50	3	0	1	0
1																													3	3	7	1	6	1	2	2	2	32	4	1	0	0
1																													1	1	2	3	2	3	3	3	1	34	2	1	0	0
1																													1	1	6	1	1	1	1	1	1	64	4	0	0	1
1																													2	2	6	1	6	1	4	2	2	35	4	1	0	0
1																													1	2	5	3	4	2	3	4	2	24	4	0	0	1
1																													4	4	5	4	4	4	3	4	3	34	4	0	0	1
1																													4	5	5	1	1	1	1	1	2	41	2	0	0	1
1																													1	1	2	1	1	1	1	1	2	25	3	0	0	1
1																													2	1	4	4	2	2	3	6	1	41	2	1	0	0
1																													3	2	6	2	1	2	2	1	2	57	3	0	0	1
1																													2	4	6	1	3	2	2	1	1	46	4	1	0	0
1																													3	3	5	2	2	2	2	2	1	35	4	0	1	0
1																													3	2	5	4	4	3	3	5	2	41	2	1	0	0
1																													4	5	4	3	4	5	4	4	3	35	4	0	0	1
1																													3	3	5	2	4	3	3	3	1	67	4	0	1	0
1																													3	2	6	2	4	2	3	5	2	24	4	0	1	0
1																													1	1	4	1	4	1	4	1	2	31	3	1	0	0
1																													2	2	4	2	2	1	1	4	2	38	3	1	0	0
1																													1	2	4	3	5	5	4	4	1	28	4	0	0	1
1																													2	2	4	1	4	1	1	1	2	40	2	1	0	0
1																													3	3	6	5	6	4	4	3	1	49	4	0	1	0
1																													4	4	6	3	6	4	6	4	1	62	2	0	0	1
1																													4	4	6	4	4	4	4	5	2	75	2	0	1	0
1																													3	2	6	2	5	1	1	1	1	42	4	1	0	0
1																													4	4	5	3	4	4	3	4	2	34	3	0	1	0
1																													2	3	4	4	7	4	7	4	2	21	2	0	0	1
1																													2	2	6	5	4	6	4	5	2	30	4	0	0	1
1																													4	4	5	4	6	3	5	3	1	50	3	0	1	0
1																													1	1	5	2	2	2	1	5	2	38	4	1	1	0
1																													4	4	6	4	5	3	4	3	1	37	4	0	1	0
1																													2	1	6	2	3	1	2	1	2	38	4	1	0	0
1																													3	3	3	3	3	2	3	2	2	45	2	0	0	1
1																													6	5	7	7	7	7	7	4	1	37	4	1	0	0
1																													3	2	5	3	4	3	2	4	2	44	2	1	0	0
1																													6	6	7	7	7	7	1	1	1	60	3	0	0	1
1																													2	2	6	1	3	2	4	1	1	50	4	0	0	1
1																													4	3	5	4	3	3	4	5	2	46	3	0	1	0
1																													2	3	5	5	6	4	4	5	1	37	4	0	0	1
1																													3	2	6	4	5	2	3	2	2	57	2	0	0	1
1																													3	3	6	1	1	1	1	1	2	41	3	1	0	0
1																													4	3	6	2	4	1	1	1	2	62	4	0	1	0
1																													2	2	7	5	5	4	3	3	1	56	3	1	0	0
2	1	1	5	4	1	1	5	4	2	50	4	0	0	1
2	1	1	5	3	3	1	3	4	2	26	4	1	0	0
2	1	1	1	1	1	1	1	1	2	36	3	0	1	0
2	1	1	5	3	3	5	5	4	2	22	4	0	0	1
2	1	3	6	3	6	2	6	6	1	20	4	0	0	1
2	1	1	6	1	5	1	5	2	2	29	3	0	0	1
2	3	1	6	6	7	1	6	7	1	37	2	0	0	1
2	2	1	7	2	5	2	5	6	2	29	3	0	0	1
2	5	5	6	6	5	5	4	5	1	23	3	0	0	1
2	2	2	5	5	3	4	5	4	2	33	3	0	0	1
2	2	2	5	2	5	2	5	5	2	30	4	0	0	1
2	1	1	6	1	1	1	1	1	2	57	3	1	0	0
2	1	1	6	1	5	1	7	6	2	23	4	0	0	1
2	1	1	7	2	7	1	5	4	2	25	4	0	0	1
2	1	1	5	2	3	3	6	5	1	26	4	0	0	1
2	4	3	5	3	7	2	5	6	1	21	3	0	0	1
2	1	1	5	3	2	2	5	4	2	24	4	0	0	1
2	1	1	5	4	1	1	5	5	2	48	3	0	1	0
2	1	1	7	7	7	7	7	7	2	37	2	0	1	0	4	4	7	7	7	1	7	7	2	38	2	0	1	0	1	1	7	7	7	7	7	7	2	39	2	0	1	0
2	1	1	7	1	6	1	7	7	1	23	4	0	0	1
2	2	2	5	2	5	1	5	5	1	19	3	1	0	0	2	1	5	3	3	1	5	5	1	20	4	0	0	1
2	1	1	6	1	6	1	7	2	2	69	3	0	0	1	1	1	6	6	6	5	5	5	2	70	3	0	0	1	2	2	6	6	5	5	6	6	2	71	3	0	0	1
2	2	1	1	1	1	1	3	1	1	22	4	0	1	0
2	1	1	6	1	6	1	7	7	1	50	4	0	0	1	1	1	5	3	3	1	5	5	1	51	4	0	0	1
2	2	2	5	3	5	3	5	5	1	24	4	0	0	1
2	1	1	4	1	1	1	1	1	2	50	4	0	0	1
2	2	2	6	2	5	1	4	4	2	25	2	0	1	0
2	1	1	3	2	2	1	4	6	2	40	4	1	0	0
2	2	2	6	4	2	2	5	6	1	56	2	0	0	1	2	2	6	5	4	4	5	6	1	57	2	0	0	1	2	2	5	3	4	2	5	5	1	58	2	0	0	1
2	2	2	7	1	6	1	2	2	2	34	4	0	0	1	2	2	6	4	6	2	5	5	2	35	4	0	0	1
2	1	1	6	3	3	2	5	5	2	27	4	0	0	1	1	1	6	2	5	2	5	5	2	28	4	0	0	1
2	2	1	5	3	4	2	4	3	1	30	4	0	0	1	2	2	6	3	4	2	4	4	1	31	4	0	0	1
2	1	1	7	3	6	3	5	1	1	26	4	0	0	1
2	1	1	5	3	2	2	5	4	1	63	4	0	0	1
2	1	1	4	1	1	1	4	4	2	34	4	0	1	0
2	1	1	4	2	5	2	4	4	2	34	4	1	1	0
2	3	1	7	7	3	3	7	7	2	29	4	1	0	0	2	1	4	4	3	4	4	7	2	30	4	1	0	0
2	3	2	2	1	2	1	1	1	1	30	4	0	0	1	3	2	1	1	2	1	1	6	1	30	4	0	0	1	3	3	4	3	3	1	2	4	1	30	4	0	0	1
2	4	2	5	5	5	4	4	5	2	25	3	0	0	1
2	1	1	5	1	5	1	5	5	2	38	4	1	0	0
2	2	1	7	4	6	2	5	3	2	44	4	1	0	0	3	3	6	4	5	4	5	3	2	45	4	1	0	0
2	1	1	6	6	6	6	6	6	2	47	4	0	0	1	1	1	6	5	6	3	6	6	2	48	4	1	0	0
2	1	1	7	4	7	3	7	7	2	27	2	0	0	1	3	1	5	4	2	2	4	4	2	28	2	0	0	1	2	1	5	4	5	4	4	4	2	29	2	0	0	1
2	2	2	4	2	4	2	4	4	1	30	4	0	0	1	2	2	2	1	1	1	4	6	1	31	4	0	1	0	2	2	2	2	2	2	2	2	1	32	4	0	1	0
2	2	2	6	3	5	2	6	4	2	28	4	0	0	1
2	1	1	7	1	1	1	4	4	1	22	3	1	1	0
2	1	1	5	2	5	1	5	5	2	40	4	0	0	1
2	1	1	4	1	3	1	5	4	2	32	3	0	0	1
2	2	2	2	2	2	1	2	1	2	27	4	0	0	1
2	1	1	7	4	5	3	5	5	2	57	3	0	0	1	2	1	7	5	7	5	7	6	2	58	3	0	0	1
2	1	1	6	3	5	1	3	3	2	25	3	0	1	0
2	1	1	5	1	5	1	6	6	2	37	2	1	0	0	1	1	4	2	1	1	3	2	2	38	2	0	0	1	1	1	6	1	5	1	1	4	2	39	3	0	0	1
2	2	2	4	4	4	4	4	4	1	33	4	0	0	1
2	2	2	2	2	2	1	1	2	1	48	4	0	0	1
2	3	1	5	3	6	3	3	3	2	20	4	0	0	1
2	2	1	5	4	5	5	5	5	1	44	4	0	0	1
2	3	3	6	1	7	1	6	6	1	35	4	1	0	0	2	2	5	1	6	1	5	5	1	36	4	1	0	0
2	1	1	7	4	4	1	6	7	2	41	2	1	1	0
2	2	2	5	1	4	1	5	4	1	35	4	1	1	0	2	1	3	1	3	1	3	1	1	36	4	1	0	0
2	1	1	6	2	2	1	5	5	2	23	2	0	0	1	1	1	6	1	1	1	1	1	2	24	2	0	0	1
2	1	1	6	1	7	1	7	7	2	20	4	0	0	1
2	2	2	5	2	3	2	3	5	2	26	4	1	0	0
2	1	1	6	3	2	1	5	2	2	39	4	1	0	0
2	1	1	7	5	2	1	6	5	2	22	4	0	0	1
2	1	3	7	1	7	1	7	7	1	25	4	0	0	1	3	3	7	7	7	5	7	7	1	26	4	0	0	1
2	1	1	7	1	6	1	7	6	2	44	4	0	0	1
2	2	2	6	5	5	3	7	4	1	23	4	0	0	1
2	1	1	7	7	7	7	6	6	1	53	3	1	1	0
2	2	2	5	2	3	2	4	5	1	21	4	0	0	1
2	1	1	7	2	2	4	7	2	2	45	2	1	1	0	1	1	4	4	4	3	4	4	2	46	2	1	0	0
2	2	1	6	7	7	5	5	6	1	28	4	0	0	1	1	1	5	5	2	2	3	5	1	29	4	0	0	1
2	1	1	6	2	4	1	4	5	2	67	4	0	0	1
2	1	1	5	1	3	1	6	6	2	54	4	0	1	0	1	1	6	1	4	1	6	6	2	55	4	0	0	1	1	1	4	1	1	1	1	2	2	56	4	0	0	1
2	1	1	5	4	4	2	6	5	1	67	2	0	1	0	3	3	3	2	2	2	5	5	1	68	2	0	1	0	2	2	5	4	3	1	5	5	1	69	2	0	1	0
2	4	4	5	5	5	5	5	5	1	34	3	1	0	0
2	1	1	2	5	6	6	5	6	2	32	2	0	0	1
2	1	1	6	2	5	2	5	4	2	30	3	1	0	0
2	4	2	6	5	7	5	6	5	1	25	4	0	0	1
2	1	1	6	1	4	1	4	5	1	31	4	0	0	1
2	1	1	6	2	6	1	2	2	2	59	4	0	0	1	1	1	6	1	6	1	2	2	2	60	3	0	0	1	1	1	6	2	6	1	3	2	2	61	3	0	0	1
2	1	1	7	1	6	1	5	5	1	50	4	0	0	1	1	1	5	2	6	1	5	2	1	51	4	0	0	1
2	1	1	5	1	5	1	5	6	1	30	4	0	0	1	1	1	4	3	3	1	2	2	1	31	2	0	0	1	1	1	5	3	4	1	2	1	1	31	2	0	0	1
2	1	1	6	3	5	2	6	6	2	59	4	0	1	0
2	1	1	7	3	5	2	7	7	2	28	4	0	0	1	2	2	4	2	4	2	5	3	2	28	4	0	0	1	1	1	4	2	2	1	3	1	2	29	4	0	0	1
2	1	1	7	1	5	4	6	7	2	55	4	0	0	1	2	1	5	4	6	4	5	5	2	56	4	0	0	1
2	2	1	4	4	4	4	4	4	2	36	4	0	0	1	4	1	4	4	4	4	4	4	2	37	4	0	0	1	2	2	5	5	4	4	4	5	2	38	4	0	0	1
2	3	2	5	1	4	1	5	5	1	23	4	0	1	0
2	1	1	1	1	1	1	1	5	1	26	2	0	0	1
2	1	1	6	3	6	2	6	6	2	33	4	0	1	0
2	2	1	4	4	3	1	4	5	1	48	4	1	0	0
2	1	1	6	4	5	2	6	4	1	29	4	0	0	1
2	1	1	6	1	4	1	6	4	2	28	4	0	0	1
2	1	1	6	2	3	2	5	4	1	34	4	0	0	1	2	2	4	4	2	2	5	5	1	35	4	0	0	1
2	2	2	5	2	5	5	6	5	2	27	4	0	0	1
2	1	1	5	3	2	1	6	5	1	46	4	0	0	1
2	2	1	5	1	3	1	4	4	2	33	2	1	1	0
2	2	1	6	1	6	1	6	6	1	67	2	0	1	0
2	1	1	6	5	3	3	7	6	1	50	4	0	0	1	1	1	7	6	6	6	7	4	1	51	4	0	0	1	1	1	5	5	5	2	7	6	1	52	4	0	0	1
2	1	1	6	4	7	4	5	5	1	47	3	0	0	1
2	2	2	6	1	6	1	6	6	2	22	4	0	0	1
2	4	2	7	6	7	4	7	7	2	27	2	0	1	0
2	1	1	4	4	3	1	3	1	2	59	4	0	1	0	1	1	6	5	5	2	4	4	2	61	4	0	1	0
2	1	1	5	3	5	2	5	4	2	26	4	0	0	1
2	1	1	6	2	3	1	5	6	2	18	2	0	0	1	5	2	6	7	6	5	6	4	2	19	2	0	0	1
2	2	2	6	3	4	2	5	6	2	34	4	0	1	0
2	1	1	6	1	5	1	5	6	1	48	4	0	0	1
2	1	1	6	1	2	1	2	6	1	49	4	0	0	1	2	2	7	1	1	1	1	1	1	50	4	0	0	1	1	1	4	1	1	1	3	3	1	51	4	0	0	1
2	1	2	5	1	1	1	4	4	2	32	4	0	0	1
2	3	1	6	4	3	4	6	4	2	26	4	0	0	1
2	1	1	6	3	4	1	6	6	3	29	4	0	0	1
2	1	1	5	1	3	1	2	6	2	62	2	0	0	1
2	2	1	6	2	5	1	6	7	2	24	2	0	0	1
2	3	1	6	2	2	1	6	5	2	36	2	1	0	0
2	1	1	5	1	1	1	6	6	1	51	4	0	0	1
2	1	1	6	2	6	2	6	6	2	19	4	0	0	1
2	1	1	5	2	4	1	4	4	2	30	2	0	0	1
2	3	1	6	1	5	2	5	5	2	21	4	0	1	0
2	1	1	6	4	7	2	3	5	1	26	3	0	0	1
2	1	1	5	2	5	2	5	2	1	27	4	0	0	1
2	1	1	7	7	5	4	7	7	1	38	4	0	0	1	2	2	6	5	2	1	5	2	1	39	4	0	0	1
2	1	1	5	1	4	1	4	2	1	42	3	0	0	1
2	1	1	5	3	5	4	6	4	1	37	3	0	0	1	5	5	5	2	4	4	4	4	1	38	3	0	1	0	2	2	5	2	1	1	4	1	1	39	3	0	1	0
2	2	2	5	5	3	2	5	5	2	45	4	1	0	0	1	1	5	5	2	3	3	5	2	46	4	1	0	0
2	1	1	2	2	1	2	7	7	1	51	3	1	0	0
2	2	2	5	3	5	2	4	6	2	20	4	0	0	1
2	2	1	6	2	4	1	5	4	2	34	1	0	0	1
2	1	1	6	1	3	2	5	5	1	72	4	0	0	1	3	3	6	3	7	2	5	5	1	73	3	0	0	1
2	4	3	1	1	1	1	1	1	2	25	3	0	0	1
2	1	1	7	3	7	1	5	6	2	24	4	1	0	0
2	2	1	6	5	6	4	5	5	1	25	4	0	0	1	2	1	5	3	6	3	5	2	1	26	4	0	0	1
2	3	4	3	4	3	3	4	3	1	31	3	0	0	1
2	2	2	6	4	4	1	4	4	2	33	4	0	0	1
2	1	1	6	6	5	4	6	6	1	36	4	1	0	0	2	1	3	3	2	3	4	5	1	37	4	1	0	0
2	2	2	6	4	6	2	6	6	2	30	3	0	0	1
2	1	1	6	1	6	2	5	4	1	56	4	0	0	1
2	1	1	5	4	3	2	5	4	2	41	4	0	1	0
2	2	1	5	2	5	1	5	3	2	27	4	0	0	1	3	2	5	4	5	1	4	6	2	28	4	0	0	1
2	1	1	6	5	5	2	5	5	1	40	2	0	0	1	2	1	4	3	5	2	5	3	1	41	2	0	0	1
2	1	1	6	6	1	2	6	5	1	21	4	0	0	1	4	4	4	2	5	1	3	3	1	22	4	0	0	1
2	1	1	6	1	2	1	6	5	2	28	4	0	0	1
2	1	1	4	3	4	2	2	5	2	46	4	1	0	0	2	2	5	4	5	4	5	5	2	47	4	1	0	0	2	2	5	2	4	3	5	5	2	48	4	0	0	1
2	2	3	5	3	5	2	4	6	1	25	4	0	0	1
2	1	1	5	4	5	3	5	3	2	57	4	0	0	1	1	1	5	4	4	1	4	2	2	58	4	0	0	1
2	1	1	5	1	2	1	4	5	2	25	4	1	0	0
2	2	2	5	3	5	2	4	5	1	58	4	0	0	1	2	2	6	4	5	3	4	3	1	59	4	0	0	1
2	2	2	5	2	3	1	3	5	1	37	4	0	1	0	2	1	5	3	5	2	2	5	1	38	4	0	1	0	3	2	4	1	4	1	4	4	1	39	4	1	1	0
2	1	2	5	5	2	4	5	6	1	27	4	0	0	1	4	5	5	4	6	6	6	5	1	28	4	1	0	0
2	1	1	6	2	5	1	5	6	2	51	2	0	0	1	1	1	5	2	5	1	5	5	2	52	2	0	0	1	2	2	5	4	5	1	4	4	2	53	2	0	0	1
2	1	1	7	2	5	2	5	2	1	48	2	0	0	1
2	2	1	5	4	5	4	5	4	1	27	4	0	0	1	1	1	5	4	4	4	4	4	1	28	4	0	1	0
2	2	2	5	2	5	2	4	2	1	40	4	0	1	0
2	1	1	4	1	2	1	1	7	2	33	4	0	0	1
2	2	1	5	1	1	1	1	7	1	36	3	0	0	1
2	2	2	5	4	5	4	4	4	1	39	4	0	1	0	2	2	5	5	5	3	5	4	1	40	4	0	1	0	2	2	5	5	6	5	5	5	1	41	4	0	1	0
2	2	2	7	7	7	6	7	7	1	20	4	0	0	1	3	2	6	6	6	6	6	6	1	20	4	0	0	1
2	1	1	6	4	6	2	5	4	2	38	4	0	0	1	1	1	4	4	6	1	6	4	2	39	4	0	0	1	1	1	4	3	2	1	4	3	2	40	4	0	0	1
2	2	1	7	3	6	4	6	5	2	53	3	0	1	0	1	1	5	3	4	3	4	5	2	54	3	0	1	0	2	1	4	3	4	3	4	4	2	55	3	0	1	0
2	1	1	6	2	5	1	5	4	1	39	4	1	0	0
2	1	1	6	1	6	1	4	1	1	34	4	0	1	0
2	1	1	6	2	6	2	6	6	1	32	4	0	1	0
2	5	2	2	1	1	1	1	2	1	19	4	0	0	1
2	2	1	5	4	5	3	4	6	2	22	4	0	0	1
2	1	1	4	4	1	1	2	4	2	25	3	0	0	1	2	1	6	5	5	1	4	3	2	26	3	0	0	1
2	2	2	6	6	6	3	6	6	2	18	4	0	0	1
2	1	1	4	4	5	4	4	6	2	33	2	1	0	0
2	1	1	6	5	7	1	6	1	1	24	4	0	0	1
2	4	2	6	6	6	6	6	7	2	45	3	0	1	0
2	1	1	6	6	6	4	6	4	1	33	3	0	0	1
2	2	1	6	6	6	4	6	6	2	56	3	1	0	0	3	1	5	6	6	4	6	6	2	57	2	1	0	0	2	2	3	3	4	4	4	4	2	58	3	1	0	0
2	3	1	6	3	6	2	5	3	2	28	3	0	0	1
2	1	1	6	3	5	4	5	5	1	30	4	0	0	1
2	1	1	7	5	7	3	7	7	2	41	2	1	0	0
2	1	1	5	3	3	2	5	4	2	19	4	0	0	1
2	3	1	7	7	7	1	6	5	2	24	4	1	0	0
2	2	2	6	4	6	4	6	5	2	28	3	1	0	0	2	2	5	3	5	3	6	5	2	29	3	1	0	0	1	1	3	3	3	3	4	5	2	30	3	1	0	0
2	2	1	6	2	3	2	7	6	2	25	4	0	0	1
2	2	2	5	1	2	1	7	6	1	48	3	1	0	0	5	2	4	4	4	4	4	4	1	49	3	1	0	0
2	1	1	7	5	7	5	7	7	2	29	4	1	0	0
2	3	2	5	2	4	1	5	5	2	41	3	0	0	1	1	1	6	2	4	1	4	3	2	42	3	0	0	1	1	1	4	4	3	3	4	4	2	43	3	0	0	1
2	1	1	6	1	2	1	3	6	3	21	4	0	0	1
2	3	1	7	2	6	1	5	6	1	19	4	0	0	1
2	2	1	6	3	5	4	6	3	2	35	4	1	0	0
2	2	1	7	3	5	2	6	6	1	76	4	0	1	0	1	1	6	6	4	3	6	6	1	77	4	0	1	0
2	3	1	7	2	3	1	6	6	2	49	4	0	0	1	4	4	3	5	5	5	3	4	2	50	4	0	0	1
2	2	1	5	1	5	1	4	2	2	57	4	0	0	1	2	1	4	2	4	1	4	1	2	58	4	0	0	1
2	1	1	5	1	5	1	2	2	2	24	4	0	0	1
2	1	1	5	2	5	1	5	5	2	22	4	0	0	1
2	3	1	6	1	5	1	1	4	2	42	4	0	0	1
2	1	2	2	1	2	1	1	1	1	39	2	0	0	1
2	2	1	3	3	3	1	5	4	1	20	4	0	1	0
2	2	2	6	6	2	2	6	3	1	53	2	0	0	1	2	1	6	3	2	2	2	2	1	54	2	0	0	1	2	2	4	4	2	2	6	2	1	55	3	0	0	1
2	3	1	5	4	4	4	5	5	2	56	3	0	0	1	1	1	6	4	6	4	4	4	2	57	3	0	0	1
2	1	1	7	3	7	1	6	2	2	41	4	0	0	1	4	3	7	6	7	1	6	7	2	42	4	0	0	1
2	1	1	5	5	5	3	4	3	2	43	4	0	0	1
2	1	1	5	4	3	2	5	2	1	39	4	1	0	0
2	1	1	7	2	3	1	7	5	2	28	2	0	0	1
2	2	2	6	2	3	2	6	6	1	34	3	1	0	0
2	1	1	6	2	4	2	4	4	2	24	4	0	0	1	2	1	1	3	3	1	2	6	2	25	4	0	0	1
2	4	2	1	1	3	1	5	5	1	29	4	1	0	0	1	1	5	1	1	1	6	1	1	30	4	1	0	0
2	1	1	7	5	4	1	1	1	1	54	4	0	0	1	2	2	6	2	2	1	1	1	1	55	4	0	0	1	3	2	6	3	3	1	1	1	1	56	4	0	0	1
2	2	1	6	2	3	2	5	5	2	19	3	0	0	1
2	1	1	5	1	4	4	1	2	2	37	3	0	0	1
2	1	1	6	6	5	2	6	6	1	27	2	0	0	1	1	1	5	3	5	2	3	2	1	28	2	0	0	1
2	2	1	6	1	6	2	5	7	1	29	4	0	1	0
2	2	1	5	3	4	1	5	4	2	27	2	0	1	0
2	1	1	5	1	5	1	5	5	1	29	4	0	0	1
2	1	1	7	1	2	2	2	2	2	34	2	1	0	0
2	1	1	6	3	6	2	5	5	2	42	2	0	0	1	2	2	6	2	5	1	5	5	2	42	2	0	0	1	2	1	3	3	2	1	3	3	2	43	2	0	0	1
2	3	1	6	2	5	1	5	7	1	25	4	0	0	1
2	2	2	5	2	5	2	5	5	1	37	4	0	0	1
2	1	1	6	6	5	1	6	5	2	57	4	1	1	0	2	2	6	6	5	2	6	6	2	58	4	0	0	1	2	2	5	3	5	5	6	2	2	59	4	0	0	1
2	1	1	7	1	2	1	6	7	1	64	4	0	0	1	1	1	6	1	1	1	6	7	1	65	4	0	0	1	1	1	4	1	1	1	6	7	1	66	4	0	1	0
2	1	1	6	1	5	1	7	7	1	41	4	0	0	1	1	1	5	1	5	1	4	2	1	42	4	0	0	1
2	2	2	6	2	4	2	4	5	1	45	4	1	1	0	2	2	4	4	4	2	5	4	1	46	4	1	0	0	2	2	4	4	4	2	6	4	1	47	4	1	0	0
2	1	1	5	1	3	1	3	5	2	60	4	0	0	1	2	2	2	2	2	1	2	2	2	61	4	0	0	1	2	2	2	1	2	1	1	1	2	62	4	0	0	1
2	1	1	6	1	5	1	6	6	1	58	4	1	0	0	1	1	5	1	5	1	4	5	1	39	4	0	0	1	1	1	4	1	4	1	4	4	1	40	4	0	0	1
2	1	1	6	4	5	1	6	6	2	31	4	0	0	1
2	1	1	7	7	6	6	6	7	2	50	4	0	0	1	4	4	5	5	3	3	5	4	2	51	4	0	0	1
2	1	1	5	1	1	1	6	6	2	26	4	0	0	1
2	2	1	5	3	2	2	5	4	2	31	4	0	0	1
2	3	1	6	5	4	2	5	6	2	34	4	1	0	0
2	1	1	5	2	5	1	5	3	1	20	4	0	0	1
2	1	1	5	3	3	1	2	5	2	30	4	0	0	1
2	1	1	5	1	6	1	5	6	2	28	4	1	0	0
2	1	1	6	4	4	3	5	4	2	29	2	0	0	1	1	1	5	5	4	2	2	4	2	30	2	0	0	1	2	1	5	4	4	3	5	5	2	31	2	0	0	1
2	4	3	5	3	3	2	5	5	1	39	2	0	0	1
2	1	1	7	1	5	1	5	3	1	66	4	0	1	0	3	2	6	2	6	1	5	5	1	67	4	0	0	1	2	1	6	3	5	1	3	5	1	68	4	0	0	1
2	2	2	6	2	3	2	5	6	3	30	4	0	0	1
2	2	1	6	1	3	1	4	6	1	34	4	1	1	0	1	1	6	4	5	1	5	5	1	35	4	0	0	1
2	1	1	5	3	4	2	5	4	2	31	3	1	0	0	3	2	5	3	3	2	5	5	2	32	3	1	1	0
2	1	1	5	3	3	2	3	5	2	27	2	1	0	0
2	1	1	6	1	5	1	4	5	3	20	4	0	0	1
2	1	1	7	2	2	1	6	6	1	18	4	1	0	0
2	3	3	2	1	2	1	2	2	2	36	2	0	0	1
2	1	1	5	4	4	1	4	5	1	40	3	1	0	0
2	2	1	7	5	4	2	7	7	2	40	4	0	0	1	3	2	4	4	4	2	4	4	2	41	4	0	0	1
2	1	1	4	4	5	2	5	5	1	37	2	0	0	1	2	1	5	2	5	4	4	5	1	38	2	0	0	1
2	1	1	5	2	3	2	6	6	2	34	4	0	0	1
2	1	1	7	1	1	1	5	5	2	18	4	0	1	0
2	1	1	4	1	1	1	4	4	1	29	4	0	0	1	1	1	4	1	1	1	4	4	1	30	4	1	0	0
2	1	1	5	1	5	1	6	4	2	58	3	0	0	1	1	1	3	2	3	1	3	2	2	59	4	0	0	1
2	1	1	6	2	6	1	1	5	1	36	4	0	0	1
2	2	1	5	2	6	2	3	5	1	22	4	0	0	1
2	1	1	7	1	2	1	6	6	2	45	4	1	0	0
2	2	1	5	2	5	1	5	4	2	31	3	0	0	1
2	4	3	5	3	5	2	5	5	1	26	3	0	0	1
2	6	2	6	2	4	2	6	6	1	71	4	0	0	1
2	2	2	4	3	3	3	4	5	1	28	3	0	0	1
2	1	1	5	1	3	1	6	5	1	47	4	0	0	1	3	2	1	1	1	1	1	1	1	48	4	0	0	1
2	1	1	4	2	1	1	6	4	1	44	2	1	0	0	1	1	7	5	6	5	6	7	1	45	2	1	0	0	1	1	5	5	5	5	5	5	1	46	2	1	0	0
2	4	2	6	4	5	2	4	4	1	58	2	0	0	1	3	3	5	4	5	1	4	4	1	59	2	0	0	1
2	1	1	6	2	1	1	5	3	2	28	4	0	0	1
2	2	2	6	1	2	1	2	6	2	30	4	0	0	1
2	2	2	4	1	2	1	5	6	1	18	2	1	1	0
2	1	1	5	3	5	3	5	5	2	48	4	1	1	0
2	1	1	7	1	3	1	5	2	2	47	4	1	0	0	1	1	4	1	1	1	2	3	2	48	4	1	0	0
2	2	2	6	6	6	5	5	5	1	34	4	0	0	1	2	2	6	6	6	6	5	5	1	35	4	0	1	0
2	3	3	6	6	6	4	6	5	1	38	2	1	1	0	2	2	4	5	5	3	6	5	1	39	2	0	0	1
2	2	2	5	4	5	4	4	4	3	34	3	0	0	1
2	1	1	7	3	5	3	7	6	2	30	4	0	0	1	4	2	5	2	4	2	5	4	2	31	4	0	1	0
2	2	1	6	6	5	3	6	7	2	49	3	0	1	0	2	1	5	3	3	3	6	6	2	50	3	0	1	0
2	3	4	4	5	5	4	4	5	2	27	2	1	0	0
2	1	1	5	2	5	1	4	3	1	43	4	0	1	0
2	1	1	5	2	1	2	4	4	2	53	2	0	0	1	1	1	4	4	1	1	4	4	2	54	2	0	0	1	1	1	5	3	4	2	4	4	2	55	2	0	0	1
2	1	1	6	3	5	3	5	5	2	19	4	0	0	1
2	1	1	6	3	3	1	6	6	2	32	3	0	0	1
2	2	1	4	4	4	3	3	5	2	45	3	0	0	1	1	1	2	3	1	1	4	3	2	46	3	0	0	1	3	1	1	1	1	1	1	1	2	47	2	0	0	1
2	1	1	7	2	4	1	5	1	2	66	4	0	0	1	1	1	7	5	6	2	6	4	2	66	4	0	0	1	1	1	7	1	5	1	5	3	2	68	4	0	0	1
2	1	1	5	1	2	1	4	6	2	47	3	0	0	1
2	1	1	7	5	6	1	6	7	1	29	4	0	0	1
2	2	2	5	5	3	4	5	5	2	37	2	1	0	0
2	1	1	6	2	6	2	6	7	1	39	2	0	0	1	3	1	5	1	5	1	4	6	1	40	2	0	1	0
2	3	1	6	2	6	1	6	3	2	20	4	0	0	1
2	1	1	6	4	3	3	6	6	2	27	4	0	0	1
2	2	2	6	1	5	2	5	3	2	31	3	1	0	0
2	2	1	7	2	5	2	6	5	2	22	4	0	0	1
2	2	2	5	4	5	5	4	5	2	39	2	0	0	1
2	2	1	5	3	3	2	5	5	2	40	4	1	1	0	1	1	5	4	5	2	5	5	2	41	4	1	0	0	1	1	5	2	2	1	5	5	2	42	4	1	1	0
2	3	3	5	4	4	2	5	6	2	20	4	0	0	1
2	3	3	6	6	6	2	5	6	1	25	2	0	0	1	4	3	6	4	6	4	6	5	1	26	2	0	0	1	3	3	5	5	5	5	5	5	1	27	2	0	0	1
2	1	1	6	2	6	1	4	4	2	40	4	1	0	0
2	2	1	5	2	3	2	6	5	2	50	4	0	0	1
2	1	1	6	5	5	2	7	7	2	29	3	0	0	1	2	1	7	7	7	5	7	7	2	30	3	0	0	1
2	1	1	6	1	6	1	6	6	2	52	4	1	0	0	2	2	6	4	5	2	4	6	2	53	4	0	0	1	1	1	5	2	4	2	5	5	2	54	4	0	0	1
2	1	1	6	5	2	1	4	5	1	20	4	0	0	1
2	1	1	7	7	4	4	7	7	2	56	3	0	1	0	1	1	7	4	4	4	4	1	2	57	3	0	1	0	1	1	4	4	4	4	4	4	2	58	3	0	1	0
2	2	2	5	1	5	1	5	5	1	35	3	0	0	1
2	2	2	6	2	5	2	6	6	2	33	4	0	0	1
2	1	1	7	2	7	2	6	5	2	49	4	0	1	0	4	3	6	4	5	2	4	5	2	50	4	0	1	0
2	1	1	6	2	5	1	3	1	2	45	3	1	0	0
2	1	1	7	2	7	2	4	4	2	50	3	0	1	0	2	1	6	6	6	4	6	6	2	51	2	0	0	1	1	1	7	4	6	4	7	7	2	52	3	0	0	1
2	2	2	7	2	5	3	6	4	1	47	2	0	0	1
2	2	1	5	1	1	1	5	6	1	25	2	0	0	1
2	2	1	7	6	6	1	6	7	1	25	4	0	0	1
2	3	2	6	1	3	2	5	4	1	29	2	0	0	1
2	1	1	7	5	5	1	7	2	1	23	3	0	1	0	2	1	7	7	5	6	5	5	1	24	3	0	1	0
2	2	1	6	3	5	2	5	4	1	37	2	1	0	0
2	2	2	6	3	6	3	6	6	1	32	4	0	1	0	1	1	6	6	6	2	6	4	1	33	4	0	1	0	2	2	5	5	4	4	3	3	1	34	4	0	1	0
2	1	1	7	2	5	1	4	3	2	26	4	0	0	1
2	1	1	4	1	5	1	5	1	2	73	3	0	1	0
2	2	1	1	1	1	1	4	6	1	36	4	1	0	0
2	2	2	6	1	2	1	5	6	1	34	4	0	0	1	3	2	4	1	2	1	2	5	1	35	4	0	0	1	3	3	4	1	4	1	3	4	1	36	4	0	0	1
2	1	1	5	1	3	2	3	6	2	22	4	0	0	1
2	1	1	5	3	5	5	4	4	2	26	3	0	0	1
2	1	1	6	2	6	1	4	5	1	39	2	0	0	1
2	2	1	7	1	4	2	7	3	2	64	4	0	0	1	1	1	5	1	5	2	6	1	2	65	4	0	0	1	2	2	5	2	5	2	5	5	2	66	4	0	0	1
2	1	1	6	3	1	2	4	2	1	65	3	0	0	1	1	1	2	4	1	2	3	3	1	66	4	0	1	0
2	4	1	6	5	5	4	5	4	1	26	2	0	0	1	3	1	5	5	4	5	4	5	1	27	2	0	0	1	2	1	4	4	4	4	4	4	1	28	2	0	0	1
2	1	1	6	1	1	1	7	7	2	65	4	0	0	1	1	1	5	1	5	1	5	5	2	66	4	1	1	0	1	1	7	5	5	1	7	7	2	67	4	0	0	1
2	1	1	5	5	4	3	5	4	2	25	4	0	0	1
2	1	2	7	4	6	1	7	6	2	41	4	1	0	0
2	1	1	7	4	5	1	4	1	2	68	4	0	0	1
2	1	1	6	5	6	5	5	5	1	31	4	1	0	0	2	1	6	6	6	5	5	5	1	32	4	1	0	0
2	2	2	4	4	4	2	4	4	1	24	2	0	0	1	5	3	2	3	4	6	5	4	1	25	2	0	1	0
2	2	1	2	2	2	1	2	2	2	22	3	0	0	1
2	2	2	6	6	5	5	6	6	2	30	4	1	1	0	2	2	6	2	4	2	6	6	2	31	4	0	0	1
2	1	1	5	1	2	1	6	5	2	31	4	0	0	1
2	2	2	4	1	4	4	3	4	1	31	4	1	0	0
2	1	1	6	1	1	1	6	6	1	29	4	0	0	1
2	1	1	6	2	6	2	6	5	1	27	4	1	0	0	2	2	5	2	6	2	5	5	1	28	4	1	0	0
2	2	1	5	4	5	2	6	4	1	21	2	0	0	1
2	2	2	7	7	7	7	7	7	1	41	4	1	0	0
2	2	2	6	4	5	5	6	5	1	32	4	1	0	0	3	2	4	4	4	4	4	4	1	33	4	1	0	0
2	1	1	6	2	5	1	6	2	2	28	3	0	0	1
2	2	2	3	1	1	1	2	3	1	41	2	0	1	0
2	1	1	6	6	6	3	6	6	1	37	2	0	1	0	2	2	4	3	4	2	4	4	1	38	2	0	0	1	1	1	4	4	3	2	5	5	1	39	2	0	0	1
2	1	1	6	2	6	2	6	4	2	68	2	0	0	1	3	2	7	6	7	4	7	7	2	69	2	0	0	1	2	2	7	5	6	2	7	6	2	70	2	0	1	0
2	1	1	5	2	5	1	3	5	2	51	4	0	0	1	1	1	5	3	3	1	3	4	2	52	4	0	0	1	1	1	6	1	2	1	4	6	2	53	4	0	1	0
2	1	1	7	2	7	1	7	5	1	55	4	0	0	1
2	4	2	5	5	5	2	5	6	2	40	3	0	0	1	4	4	5	5	5	2	5	5	2	41	4	0	0	1	4	4	5	6	5	6	7	7	2	42	4	0	0	1
2	1	1	7	7	7	7	7	5	1	54	4	0	0	1	1	1	5	5	5	2	5	2	1	55	4	0	1	0	1	1	6	5	6	5	6	2	1	56	4	0	0	1
2	2	2	6	3	6	2	5	5	1	62	3	0	1	0
2	2	1	6	3	2	4	4	5	2	42	2	0	0	1
2	1	1	6	5	5	1	6	6	1	53	4	1	0	0
2	1	1	5	2	5	1	5	4	1	52	4	1	0	0	1	1	6	4	4	2	5	5	1	53	4	1	0	0	2	1	5	2	5	1	5	4	1	54	4	1	0	0
2	1	1	7	4	4	1	4	4	2	38	2	1	0	0
2	1	1	6	2	5	2	4	6	1	35	3	1	0	0
2	6	1	5	7	5	5	5	6	2	50	3	1	0	0	4	1	1	1	7	7	7	7	2	51	3	1	0	0
2	1	1	5	4	5	4	6	3	2	27	3	0	0	1
2	2	2	6	2	6	1	4	5	1	28	4	0	0	1
2	3	1	5	5	5	3	6	6	2	27	3	1	0	0	2	1	5	5	5	3	5	5	2	28	4	0	0	1	3	1	5	5	5	3	5	7	2	29	3	1	0	0
2	3	3	5	5	5	5	5	5	2	33	3	1	0	0	2	2	5	3	5	5	6	5	2	34	3	1	0	0
2	1	1	5	1	1	1	1	1	1	53	3	0	0	1
2	3	2	5	3	5	4	5	5	1	40	3	0	0	1
2	1	1	7	1	7	1	7	3	2	38	4	0	0	1
2	2	2	3	1	3	1	7	6	1	20	2	1	0	0
2	2	1	6	1	5	1	5	6	2	31	4	1	0	0
2	2	1	6	3	6	2	4	5	1	29	4	0	0	1	4	4	6	5	5	2	4	5	1	30	4	0	1	0	2	2	4	3	5	2	5	6	1	31	4	0	0	1
2	3	3	4	1	1	1	1	1	2	43	4	0	0	1	5	5	1	1	1	1	1	1	2	44	4	0	0	1	6	4	1	1	1	1	1	1	2	45	4	0	0	1
2	2	1	6	4	4	1	5	5	1	35	4	1	0	0	3	3	5	3	5	2	5	5	1	36	4	1	0	0
2	1	1	5	2	3	2	4	5	1	37	4	1	0	0	1	1	4	1	1	1	4	4	1	38	4	1	0	0
2	1	1	5	3	2	1	6	1	1	31	4	0	0	1	2	1	2	2	2	1	2	6	1	32	4	0	0	1
2	1	1	6	1	6	1	4	5	2	65	3	0	1	0
2	2	1	7	4	5	1	5	7	2	26	4	0	0	1	4	3	6	4	5	1	4	4	2	27	4	0	0	1	3	1	5	4	5	1	3	2	2	28	4	0	0	1
2	2	1	4	3	4	1	7	5	1	28	2	0	1	0
2	1	1	5	1	2	1	2	6	2	32	2	0	1	0
2	1	1	7	1	7	1	7	5	1	31	2	1	0	0
2	1	1	5	4	7	6	3	7	2	26	4	0	0	1
2	1	1	3	2	4	2	4	5	2	42	2	0	0	1
2	2	1	5	2	1	3	6	6	1	21	3	0	0	1	4	3	7	6	5	6	7	7	1	22	4	0	0	1	2	1	5	5	5	2	6	5	1	23	4	0	0	1
2	1	1	6	1	2	1	4	7	2	28	4	0	0	1
2	3	2	3	2	3	2	4	4	1	37	4	0	0	1	2	2	2	2	6	2	2	2	1	37	3	0	0	1
2	4	2	5	3	4	1	4	4	1	23	4	0	0	1
2	2	2	6	3	6	4	6	4	2	28	4	0	0	1
2	1	1	7	7	7	7	7	7	2	29	4	0	0	1
2	3	1	7	7	7	7	7	7	1	35	4	1	0	0	3	1	7	1	4	1	7	5	1	36	4	1	0	0	3	1	7	7	4	4	5	5	1	37	4	1	0	0
2	3	3	5	2	5	2	6	6	2	36	4	0	1	0
2	2	2	5	2	4	2	4	3	1	55	4	0	0	1	3	3	5	2	5	2	2	4	1	56	3	0	0	1	3	3	4	3	4	3	3	4	1	57	3	0	0	1
2	1	1	5	1	5	1	5	5	2	62	2	0	0	1	2	2	4	1	1	1	4	4	2	63	2	0	0	1
2	1	1	5	1	2	1	2	5	2	44	3	1	0	0	2	2	1	1	1	1	1	4	2	45	3	1	0	0	2	2	4	2	2	2	4	2	2	46	4	1	0	0
2	1	1	6	6	2	2	5	5	2	46	4	0	0	1
2	2	2	6	6	6	7	6	7	1	42	4	1	0	0
2	1	1	5	1	5	1	4	1	1	29	2	0	0	1	1	1	4	4	5	4	4	3	1	30	2	0	0	1
2	2	2	4	4	4	4	5	4	2	31	4	0	0	1	3	2	4	4	4	4	4	4	2	32	4	0	0	1	2	2	4	4	4	4	4	4	2	33	3	0	0	1
2	1	1	4	1	6	4	6	5	1	22	2	1	0	0	1	1	7	3	7	2	4	5	1	23	2	1	0	0
2	1	1	6	4	6	3	5	6	1	47	3	1	1	0	2	1	5	4	5	3	6	6	1	48	3	0	1	0
2	3	2	4	5	4	4	4	4	1	35	4	1	0	0
2	2	1	7	4	6	4	5	6	1	31	2	0	0	1
2	2	1	7	4	5	2	6	5	2	20	4	0	0	1
2	1	1	7	7	3	3	7	4	1	45	4	1	0	0
2	3	2	6	6	6	7	7	7	1	34	4	1	0	0
2	2	1	4	4	3	2	5	2	1	29	3	0	0	1	3	2	4	4	5	2	3	3	1	30	3	0	0	1
2	2	1	5	3	3	1	4	5	2	43	4	0	0	1
2	1	1	6	4	7	6	6	4	1	21	3	0	0	1
2	2	1	4	4	4	4	4	4	1	34	4	1	0	0	3	3	6	3	5	6	6	5	1	35	4	1	0	0
2	1	1	6	2	5	2	3	2	1	69	4	0	1	0	2	4	6	1	4	1	4	1	1	70	4	0	1	0	2	2	5	5	6	2	6	4	1	71	4	0	1	0
2	3	2	4	2	4	2	6	6	1	32	4	0	0	1
2	3	1	5	1	3	1	4	1	2	44	3	1	1	0
2	1	1	6	1	4	1	4	6	2	32	4	0	0	1	1	1	5	2	4	2	6	6	2	33	4	0	0	1	2	1	4	1	1	1	3	3	2	34	4	0	0	1
2	1	1	6	2	4	5	6	3	1	56	4	0	0	1	2	2	5	2	4	2	3	2	1	57	4	0	0	1	2	2	3	2	4	1	4	4	1	58	4	1	0	0
2	2	1	4	4	3	2	5	6	2	21	2	1	0	0
2	4	3	6	4	5	4	6	4	1	29	4	1	0	0
2	1	1	6	1	5	1	6	5	1	29	4	0	0	1
2	2	2	7	4	3	5	5	5	2	24	4	0	0	1	2	2	5	4	4	4	5	5	2	25	4	0	0	1	2	2	4	4	4	4	4	4	2	26	4	0	0	1
2	2	2	6	6	6	2	6	6	2	25	3	0	0	1
2	1	1	7	6	5	3	5	5	1	53	4	0	0	1	1	1	7	7	3	1	4	1	1	54	4	0	0	1	5	4	7	6	5	4	6	4	1	55	4	0	0	1
2	2	2	3	2	2	2	3	6	1	28	2	0	1	0	2	2	2	2	2	1	2	2	1	29	2	0	1	0	3	3	2	2	1	2	2	2	1	30	2	0	0	1
2	3	2	5	2	4	4	5	4	1	26	2	0	0	1	3	3	7	5	6	2	7	7	1	27	2	0	0	1
2	1	1	5	6	5	2	5	7	1	43	4	0	1	0	2	1	6	2	3	1	5	6	1	44	4	0	1	0	2	1	6	2	3	1	6	5	1	45	4	0	1	0
2															2	2	4	2	4	1	3	4	2	40	4	1	0	0
2															1	1	7	1	7	1	7	7	2	25	2	0	0	1	2	2	7	1	7	1	7	7	2	26	2	0	1	0
2															2	2	4	3	1	1	3	4	1	20	4	0	0	1	2	2	3	1	1	1	1	4	1	21	4	1	1	0
2															1	1	3	1	1	1	4	2	2	33	2	1	0	0
2															3	1	4	3	4	3	5	5	2	29	2	1	0	0
2															3	2	4	5	5	2	4	6	2	21	3	0	0	1
2															2	1	5	4	5	3	5	3	2	36	3	1	0	0	3	3	6	5	5	4	4	6	2	37	4	1	0	0
2															2	2	5	4	5	2	6	7	3	41	4	1	0	0
2															3	2	6	2	6	2	5	5	1	25	4	0	0	1
2															1	1	5	2	6	2	5	5	2	22	3	0	0	1
2															3	2	2	1	3	1	4	4	2	27	2	0	0	1
2															3	4	6	4	7	4	6	4	2	25	4	0	1	0
2															5	5	5	1	7	1	4	5	1	49	4	0	0	1
2															1	1	6	5	6	6	6	6	1	37	3	1	0	0
2															2	1	5	3	5	2	4	3	2	58	4	0	0	1
2															1	1	5	6	4	4	5	6	2	45	4	1	0	0	1	1	1	1	4	2	1	5	2	46	4	0	0	1
2															2	2	6	7	6	5	5	6	2	21	4	0	0	1	2	1	7	5	6	2	5	5	2	21	2	0	0	1
2															3	1	7	4	6	1	5	1	2	40	4	1	0	0	4	1	6	2	6	2	6	5	2	41	4	1	0	0
2															2	2	6	6	5	4	6	6	2	31	4	1	0	0	1	1	6	4	5	4	6	5	2	32	3	1	0	0
2															2	2	6	5	5	5	6	6	2	31	4	1	0	0
2															2	2	5	3	5	2	5	4	2	19	4	0	0	1
2															1	1	4	2	4	2	6	4	1	47	3	1	0	0
2															3	2	6	3	4	2	4	4	2	18	4	0	0	1
2															2	1	4	1	2	1	1	1	2	46	3	0	0	1
2															2	1	1	1	1	1	1	5	2	20	4	1	0	0
2															2	2	6	3	5	2	5	6	2	22	4	0	0	1
2															3	1	5	4	3	2	5	6	1	35	4	0	0	1
2															2	1	5	5	3	2	5	2	2	34	4	1	0	0
2															1	1	1	1	1	1	2	1	2	37	4	1	0	0
2															1	1	5	2	2	1	2	4	2	48	4	0	1	0
2															3	2	4	3	3	3	4	2	1	21	4	0	0	1
2															1	1	6	2	5	2	2	2	2	25	4	0	0	1
2															2	2	5	4	5	2	4	4	2	20	4	0	0	1
2															1	1	5	1	1	2	5	5	2	23	4	0	0	1
2															1	2	5	1	5	1	3	3	1	41	4	1	0	0
2															1	1	4	2	4	3	4	4	2	43	3	0	0	1	2	2	4	3	4	2	4	4	2	44	3	0	0	1
2															2	1	7	3	4	3	6	6	1	26	4	0	0	1
2															2	1	5	4	5	3	6	5	2	26	4	0	0	1
2															3	2	6	3	4	1	4	6	2	38	2	0	0	1	2	1	6	1	3	1	4	4	2	39	3	0	0	1
2															3	2	7	6	6	5	4	4	2	38	4	1	0	0
2															3	2	5	4	3	3	6	5	2	22	4	0	0	1
2															1	1	6	2	5	1	3	4	2	45	2	0	1	0
2															2	2	6	3	5	2	5	3	1	43	4	1	0	0
2															1	1	7	5	7	1	2	5	1	39	4	1	0	0	1	1	4	1	4	1	2	1	1	40	4	1	0	0
2															1	1	6	1	6	1	6	1	2	39	2	1	0	0	1	1	3	1	1	1	3	2	2	40	2	1	0	0
2															1	1	4	2	4	4	5	6	2	28	3	1	1	0
2															3	1	5	1	4	1	1	1	1	65	3	0	0	1
2															1	1	7	7	4	1	6	7	1	31	3	0	0	1
2															2	1	5	2	5	3	5	3	1	34	2	0	1	0
2															3	3	2	1	1	1	1	2	1	32	4	0	0	1
2															3	1	7	5	7	4	7	4	2	46	4	1	0	0	4	1	4	4	4	4	4	4	2	47	4	0	0	1
2															1	1	5	1	5	2	5	6	2	35	4	0	0	1
2															2	1	5	1	4	1	3	4	1	28	4	0	0	1
2															2	1	3	1	1	1	2	2	1	27	3	0	1	0
2															2	2	6	3	3	1	6	6	2	27	4	0	0	1
2															2	2	3	1	2	1	2	3	1	24	4	0	0	1
2															2	2	4	1	6	1	5	5	1	22	3	0	0	1
2															3	2	6	2	3	1	4	3	3	19	4	0	1	0
2															1	2	5	2	4	3	4	5	1	25	4	0	0	1
2															2	1	6	3	5	2	5	5	1	25	4	0	0	1
2															2	1	5	3	4	2	6	6	3	18	3	0	0	1
2															3	3	4	3	4	1	5	5	1	44	4	1	0	0
2															3	2	6	5	5	5	5	6	2	23	3	0	0	1	3	2	6	5	5	5	6	6	2	24	3	0	0	1
2															4	2	3	3	5	2	5	5	1	21	4	0	0	1
2															2	2	6	4	6	4	6	3	1	25	4	0	0	1
2															3	2	6	4	4	3	5	5	1	25	4	0	0	1
2															1	2	4	3	2	1	4	5	2	27	4	0	0	1
2															2	1	6	1	3	3	5	5	2	23	4	0	0	1	2	1	6	7	3	2	5	7	2	24	4	0	0	1
2															1	1	4	4	4	4	6	5	2	66	2	0	0	1
2															2	2	4	4	4	4	4	4	1	29	4	0	0	1
2															2	1	6	4	4	2	3	4	2	26	4	0	0	1
2															6	6	5	7	3	1	3	1	1	63	2	0	1	0	3	4	3	5	1	3	2	2	1	64	2	0	0	1
2															3	3	6	6	5	3	5	3	1	24	4	0	1	0
2															2	1	5	2	4	1	7	5	2	36	3	0	0	1
2															2	2	7	5	3	3	7	7	1	20	4	0	0	1
2															3	3	6	1	4	1	4	1	2	40	4	1	0	0
2															1	1	6	5	5	4	5	5	2	23	3	0	0	1
2															2	2	3	2	2	2	2	6	2	31	4	1	0	0
2															3	3	5	3	6	2	5	6	2	32	4	0	0	1	2	2	5	4	4	2	4	4	2	33	4	0	0	1
2															3	3	5	1	4	3	5	4	1	59	4	1	0	0
2															1	1	7	2	4	2	4	7	1	35	4	1	0	0	1	1	5	3	5	1	4	5	1	36	4	1	0	0
2															1	1	4	2	2	1	5	5	2	44	4	0	0	1
2															3	3	5	2	5	2	3	4	2	23	4	0	0	1	2	2	5	2	5	1	4	4	2	24	4	0	0	1
2															1	1	6	1	2	1	4	5	2	29	2	1	0	0
2															2	2	5	5	5	4	5	3	2	35	3	1	0	0
2															4	2	5	1	1	1	2	3	2	24	2	0	0	1
2															1	1	2	1	2	1	1	6	1	21	4	0	0	1
2															1	1	5	3	4	2	4	5	3	27	4	1	0	0
2															2	1	6	4	5	2	4	4	1	67	4	0	1	0	3	2	7	4	6	4	4	3	1	68	4	0	0	1
2															1	1	7	6	7	7	5	6	1	32	2	0	0	1
2															3	3	4	4	4	4	4	4	1	34	2	0	0	1	3	3	4	3	4	3	4	4	1	35	2	0	0	1
2															1	1	6	3	5	1	7	4	2	43	4	0	0	1
2															1	1	2	2	4	1	2	4	1	31	4	0	0	1
2															2	2	4	1	4	1	4	6	2	34	4	1	0	0	1	1	4	1	4	1	4	4	2	35	4	1	0	0
2															2	1	7	2	6	1	7	5	1	23	4	0	0	1
2															5	5	7	7	6	3	2	7	1	19	4	0	0	1
2															1	1	6	3	5	2	5	5	1	23	4	0	0	1
2															2	2	5	3	3	3	6	6	1	26	2	0	0	1	2	2	4	3	2	2	4	5	1	27	4	0	0	1
2															2	2	2	4	3	4	3	2	2	27	4	0	0	1	2	2	5	4	5	3	5	5	2	28	4	0	0	1
2															2	2	6	2	6	2	6	7	2	19	4	0	0	1
2															1	1	4	2	5	2	5	5	1	29	4	0	1	0
2															3	2	5	2	5	5	6	6	2	33	4	1	0	0	1	1	6	3	3	1	6	6	2	34	4	1	0	0
2															1	1	1	1	2	1	2	2	2	51	2	0	0	1
2															1	1	6	2	4	1	3	2	2	21	2	0	0	1
2															1	1	6	2	5	2	5	6	2	23	4	0	1	0
2															3	2	6	5	6	3	5	5	1	70	4	0	1	0
2															1	1	3	1	3	1	6	4	2	35	3	1	0	0
2															4	2	6	3	3	2	6	6	2	31	4	0	0	1
2															4	2	6	3	3	3	5	5	1	18	2	0	0	1
2															2	2	4	6	3	3	4	5	2	28	3	0	0	1
2															3	1	5	3	3	2	4	5	2	26	4	0	0	1
2															1	1	4	4	3	2	4	3	2	42	4	0	1	0	2	1	4	3	2	1	4	4	2	43	4	0	1	0
2															4	2	5	2	6	1	5	2	2	20	4	0	0	1
2															3	3	6	3	5	3	6	6	2	18	3	0	0	1
2															2	1	4	4	5	4	5	4	2	27	4	0	1	0
2															2	2	5	3	5	2	2	2	2	26	4	0	0	1	2	1	5	5	5	2	5	2	2	27	4	0	1	0
2															3	1	6	1	2	1	5	1	2	28	3	0	0	1
2															1	1	5	1	5	1	2	1	1	27	4	1	0	0
2															3	1	1	1	1	1	5	4	1	28	4	0	0	1
2															5	2	3	2	3	2	4	4	1	53	3	0	0	1
2															2	2	4	4	4	3	3	4	2	49	4	0	0	1	1	1	6	2	4	2	6	6	2	50	4	0	0	1
2															3	2	5	3	5	3	5	4	2	20	4	0	0	1	3	2	6	3	5	1	3	2	2	21	4	0	0	1
2															2	3	7	1	7	1	5	1	1	32	2	0	0	1
2															3	1	5	1	4	1	5	2	1	26	2	0	0	1
2															3	4	4	3	6	3	4	2	1	32	4	1	0	0	2	2	5	1	5	1	3	2	1	33	4	1	0	0
2															1	1	3	1	3	1	3	3	1	30	2	0	0	1
2															2	2	6	4	6	3	6	4	2	31	3	0	0	1
2															2	2	4	4	2	4	6	6	1	35	3	0	0	1	3	3	4	4	4	4	4	4	1	36	3	1	1	0
2															1	1	4	4	2	2	4	4	2	38	4	1	0	0
2															1	1	5	2	3	2	4	5	2	63	3	0	0	1	1	1	5	1	6	3	1	1	2	64	3	0	0	1
2															1	1	1	1	1	1	3	4	2	30	4	1	0	0
2															1	1	5	3	5	3	4	3	2	27	3	1	1	0
2															3	1	5	1	4	1	4	6	2	57	3	0	0	1	4	2	5	4	2	2	5	5	2	58	3	0	0	1
2															2	2	2	2	2	1	2	2	2	19	4	0	0	1
2															3	3	5	4	5	5	5	4	1	23	3	0	0	1
2															3	1	1	4	1	1	1	2	2	58	2	0	0	1	1	1	4	4	4	4	4	4	2	58	2	0	0	1
2															2	1	1	1	1	4	4	7	1	24	4	0	0	1
2															3	1	4	1	5	1	4	4	2	19	4	0	0	1
2															1	1	6	2	6	2	4	2	1	23	4	0	0	1
2															1	1	6	3	5	2	5	2	2	25	4	0	0	1
2															3	3	5	4	3	4	4	4	2	54	4	0	0	1	1	1	5	3	5	3	5	3	2	55	4	0	0	1
2															3	3	7	6	4	1	7	7	1	47	4	0	0	1	3	3	7	2	6	1	6	6	1	48	4	0	0	1
2															1	1	5	6	6	6	5	5	1	35	4	0	0	1
2															1	1	1	1	1	1	1	1	2	43	4	0	0	1
2															4	2	4	2	5	2	5	5	2	19	2	0	0	1
2															1	1	2	1	1	1	1	4	3	26	3	0	0	1
2															2	1	5	1	2	1	5	2	1	52	4	0	0	1
2															2	2	4	3	3	2	5	5	1	30	4	1	0	0
2															2	2	3	4	5	1	1	5	1	20	4	1	0	0
2															4	2	6	2	5	2	6	6	2	29	4	0	0	1	2	1	5	4	3	2	5	6	2	30	4	0	0	1
2															2	1	5	4	3	1	5	6	2	25	4	0	0	1
2															1	1	4	4	4	3	4	4	2	34	4	0	0	1
2															4	4	1	1	3	1	1	3	2	25	4	0	0	1	2	2	3	2	2	2	5	3	2	26	4	0	0	1
2															2	1	4	3	3	2	4	4	2	29	3	1	0	0
2															3	2	5	5	5	4	3	1	2	20	4	0	0	1
2															3	3	6	5	4	2	4	4	2	37	4	0	0	1
2															1	1	6	1	5	1	6	5	1	43	4	1	0	0
2															5	5	5	4	5	3	5	4	1	37	4	1	0	0
2															1	1	4	1	4	1	1	4	1	37	4	0	0	1	1	1	4	1	1	1	1	1	1	38	4	0	0	1
2															2	2	6	5	6	5	6	6	2	26	4	0	1	0
2															3	2	7	4	6	2	5	6	2	24	4	0	0	1
2															2	1	6	1	6	2	5	6	2	23	4	0	0	1
2															2	2	6	5	6	2	6	5	2	32	4	0	0	1
2															2	2	4	2	2	2	4	4	2	32	3	1	0	0
2															2	1	6	3	5	2	5	4	2	42	4	0	1	0
2															3	2	5	3	5	2	4	2	1	39	4	1	0	0
2															3	2	1	1	3	1	1	2	1	20	3	0	0	1	3	2	5	2	2	1	2	2	1	21	3	0	1	0
2															1	1	6	4	5	2	5	6	2	31	2	0	0	1
2															1	1	5	2	3	1	5	5	2	30	4	1	1	0
2															1	1	1	1	1	1	7	1	1	25	3	0	0	1
2															3	2	2	5	5	2	3	3	1	22	3	0	1	0
2															2	2	4	4	6	2	4	2	2	22	2	0	0	1
2															4	1	7	7	7	2	7	7	2	32	2	1	0	0
2															3	1	5	4	5	4	6	6	2	20	4	0	0	1
2															2	2	7	6	7	6	7	7	1	45	3	1	0	0
2															2	2	4	1	2	1	2	1	3	37	2	0	0	1	2	2	5	3	2	2	2	2	3	38	2	0	0	1
2															2	2	4	3	3	1	4	3	1	29	4	0	0	1
2															3	3	3	2	2	1	1	2	2	19	4	1	0	0	3	3	5	4	1	1	1	1	2	20	4	1	1	0
2															3	2	5	1	5	1	3	3	2	24	2	0	1	0
2															1	1	7	1	3	3	7	1	1	18	2	0	0	1
2															4	4	3	2	3	1	5	3	2	28	4	0	0	1
2															2	2	5	2	5	2	5	5	1	32	4	0	0	1
2															3	2	6	4	6	2	4	1	1	22	4	0	0	1
2															3	3	5	4	5	4	5	5	1	28	2	1	1	0
2															2	2	6	2	6	2	6	3	2	35	4	0	0	1
2															3	2	5	2	5	1	4	4	2	30	4	0	1	0
2															4	3	5	2	3	3	5	5	2	20	4	0	0	1
2															1	1	6	3	4	3	5	4	2	47	4	0	0	1
2															1	1	6	3	6	2	6	6	2	55	3	0	0	1
2															2	1	7	4	4	4	6	6	2	41	4	1	0	0
2															1	1	6	1	3	1	4	4	1	23	2	0	0	1
2															1	1	2	1	2	2	2	2	2	22	4	0	0	1
2															4	4	5	4	5	4	4	4	1	25	4	0	0	1
2															3	2	6	4	4	3	4	4	3	24	4	0	0	1
2															3	3	5	5	2	2	5	5	2	31	3	0	0	1	2	1	1	2	2	1	5	4	2	31	3	1	1	0
2															2	1	6	4	6	2	5	4	1	60	3	0	0	1
2															1	1	7	4	7	1	4	6	1	37	4	1	0	0
2															4	3	5	5	5	4	5	5	2	23	4	0	1	0
2															1	1	7	1	7	1	1	1	1	55	3	0	0	1
2															2	1	6	6	6	5	6	5	1	48	4	1	0	0	1	1	4	3	6	3	3	3	1	49	4	0	0	1
2															1	2	3	3	2	1	3	3	2	40	4	0	0	1	2	1	5	2	3	1	4	2	2	41	4	0	0	1
2															2	2	6	6	5	2	6	6	2	20	4	0	0	1	1	1	6	6	5	5	6	6	2	21	4	0	0	1
2															2	2	6	4	4	4	5	5	2	31	4	1	0	0
2															2	2	3	1	4	1	4	4	2	36	3	1	0	0
2															1	1	6	5	2	3	3	7	2	44	2	0	0	1
2															2	2	6	3	5	3	6	6	2	47	3	0	0	1
2															2	2	4	4	3	2	5	5	2	68	3	0	1	0	1	1	6	6	4	4	6	5	2	69	4	0	1	0
2															1	1	6	4	5	3	6	4	2	30	4	0	0	1
2															1	2	6	3	7	2	5	1	2	28	4	0	0	1
2															1	1	4	2	1	1	5	5	2	36	4	0	0	1
2															1	1	7	6	7	6	6	7	1	39	4	0	1	0
2															3	3	4	3	6	1	5	4	1	33	4	0	0	1
2															2	1	7	6	5	5	7	7	1	35	3	1	0	0
2															2	2	7	6	5	1	3	6	1	22	4	0	0	1
2															4	2	6	4	3	2	6	4	2	64	4	0	0	1	4	3	6	3	3	2	6	6	2	65	4	0	0	1
2															2	2	5	1	4	1	4	4	1	22	2	0	0	1
2															1	1	1	1	1	1	1	1	1	27	4	0	1	0
2															3	1	4	4	6	3	2	4	2	31	4	1	0	0
2															3	1	5	1	2	1	3	3	1	30	3	0	0	1
2															2	2	6	4	6	3	6	6	2	24	4	0	0	1
2															1	1	6	2	3	2	6	5	1	21	4	0	1	0
2															2	1	6	2	4	2	5	5	1	44	4	0	1	0
2															2	1	5	5	6	5	5	5	1	31	4	0	1	0
2															2	2	6	1	7	1	6	4	1	29	4	1	1	0	1	1	6	5	7	2	6	6	1	30	4	1	1	0
2															3	1	7	6	5	1	7	7	2	28	2	0	0	1
2															1	1	4	4	4	4	4	4	2	30	2	1	0	0
2															3	5	4	2	2	4	3	4	2	25	2	0	0	1
2															3	2	5	2	5	1	3	1	2	50	4	0	0	1
2															1	1	5	2	3	2	3	3	2	29	4	0	0	1
2															4	5	6	6	7	6	6	6	2	36	4	1	0	0
2															3	2	5	5	4	3	3	5	2	33	4	0	0	1	3	2	6	5	3	2	5	5	2	34	4	0	0	1
2															1	1	2	1	1	1	1	1	1	22	4	1	1	0
2															3	1	5	2	4	1	5	3	1	21	4	0	1	0
2															3	2	6	6	4	4	6	6	2	40	4	1	0	0
2															2	2	4	4	4	3	6	5	2	21	4	0	0	1
2															2	2	5	4	4	4	4	4	2	28	3	0	0	1
2															1	1	1	1	1	1	1	6	2	62	2	0	0	1
2															1	1	4	3	4	3	5	5	2	25	4	0	0	1
2															1	1	7	2	6	1	6	6	2	23	2	1	0	0	1	1	7	5	6	2	7	7	2	24	3	1	0	0
2															1	1	5	5	5	5	4	4	1	26	3	0	0	1
2															2	2	6	6	6	4	6	6	2	36	4	1	0	0
2															1	1	4	4	2	2	4	4	2	45	2	0	0	1	1	1	5	4	2	1	4	2	2	46	3	0	0	1
2															2	2	6	3	2	1	2	3	2	21	3	0	0	1	1	1	5	5	4	3	1	1	2	22	3	0	0	1
2															4	3	5	3	5	3	5	5	2	23	4	0	0	1
2															3	3	4	4	2	4	6	6	1	32	4	1	0	0
2															2	1	7	6	4	2	4	6	2	27	4	0	0	1
2															6	4	7	4	1	1	4	1	1	36	3	1	0	0
2																													1	1	1	1	2	1	2	1	2	23	4	0	0	1
2																													2	2	4	3	2	2	5	5	2	28	4	0	1	0
2																													2	2	3	3	3	3	3	3	2	42	4	0	0	1
2																													2	1	6	6	5	3	6	5	2	19	2	0	0	1
2																													3	2	5	4	5	2	4	4	2	25	4	0	0	1
2																													2	2	2	1	1	1	1	1	1	43	3	0	0	1
2																													1	2	2	3	4	2	3	4	2	25	4	0	0	1
2																													1	1	4	2	5	1	3	4	2	31	4	0	0	1
2																													1	1	6	2	6	1	3	2	3	28	3	0	0	1
2																													1	1	5	3	5	2	5	4	1	38	4	0	0	1
2																													2	1	7	6	6	5	6	7	1	27	2	1	0	0
2																													2	1	5	4	6	1	6	2	2	19	4	0	1	0
2																													1	1	5	1	4	1	2	1	2	28	4	0	0	1
2																													4	1	5	6	3	4	5	4	1	37	2	0	1	0
2																													1	1	1	1	1	1	1	1	2	33	3	1	0	0
2																													1	1	1	1	1	1	1	1	2	31	4	1	0	0
2																													4	2	6	4	6	5	4	2	2	32	4	0	0	1
2																													2	1	4	2	3	4	3	5	2	19	3	0	0	1
2																													2	2	5	5	6	3	5	3	2	52	4	0	0	1
2																													2	2	5	3	5	4	4	4	2	31	4	1	0	0
2																													1	1	3	2	1	2	5	6	1	44	3	0	1	0
2																													1	1	5	5	6	4	5	5	2	21	4	0	0	1
2																													3	5	5	4	4	5	6	5	2	24	4	0	0	1
2																													2	1	1	1	1	1	4	2	2	26	3	0	1	0
2																													1	1	5	1	1	1	2	1	1	52	4	0	0	1
2																													3	2	5	4	5	4	5	5	2	23	4	0	0	1
2																													1	3	2	1	1	2	3	4	2	21	2	0	1	0
2																													1	1	5	4	4	4	5	2	2	24	4	0	0	1
2																													2	2	2	3	2	1	5	5	3	24	3	0	0	1
2																													3	1	1	1	1	1	1	2	1	19	2	0	0	1
2																													1	1	1	1	5	1	4	1	2	23	4	0	0	1
2																													3	3	5	5	5	2	5	5	2	22	2	0	0	1
2																													1	1	2	2	2	4	4	2	2	30	4	1	1	0
2																													1	1	4	1	2	2	4	2	2	25	3	0	0	1
2																													1	1	5	1	4	1	4	4	1	35	4	0	0	1
2																													1	1	6	3	5	4	5	2	1	27	4	0	0	1
2																													2	3	5	1	3	2	5	3	2	20	4	0	0	1
2																													1	1	4	2	3	1	2	5	2	30	2	0	0	1
2																													3	3	5	3	5	1	5	4	2	37	4	0	1	0
2																													1	1	4	4	1	1	5	2	2	29	4	0	0	1
2																													2	2	5	3	3	2	5	3	2	23	3	1	0	0
2																													3	1	4	4	4	2	5	5	2	37	3	1	0	0
2																													3	3	5	4	5	2	6	3	1	39	4	1	0	0
2																													1	1	5	1	5	1	5	6	1	34	2	0	0	1
2																													2	2	6	5	3	2	5	6	2	29	4	1	0	0
2																													3	2	5	4	2	3	4	5	1	39	2	0	0	1
2																													1	1	5	2	1	1	2	1	2	27	4	0	0	1
2																													1	1	3	1	1	1	2	5	2	35	3	1	0	0
2																													1	1	4	4	4	4	4	4	2	21	2	0	0	1
2																													2	2	1	1	1	1	1	1	2	48	4	0	0	1
2																													2	2	7	3	5	2	6	6	2	20	4	0	0	1
2																													1	1	2	2	2	2	2	3	2	33	4	1	0	0
2																													1	1	3	2	3	2	3	6	2	59	4	0	0	1
2																													2	1	5	4	5	2	3	2	2	27	4	0	1	0
2																													3	1	6	2	5	1	2	3	2	30	3	0	0	1
2																													3	1	4	1	3	2	5	5	2	21	4	0	0	1
2																													1	1	4	4	3	3	4	6	2	34	3	1	0	0
2																													1	1	2	1	2	2	1	4	2	30	3	1	0	0
2																													1	1	4	4	1	2	2	2	2	22	4	0	0	1
2																													2	2	4	4	4	4	4	4	2	37	3	1	0	0
2																													1	1	1	1	1	4	4	6	2	71	2	0	0	1
2																													2	1	4	5	5	3	5	4	2	28	2	0	0	1
2																													1	1	1	1	1	1	4	1	1	34	4	1	0	0
2																													1	1	2	1	1	1	1	6	3	34	3	0	0	1
2																													3	2	5	4	4	4	5	4	1	46	3	0	1	0
2																													2	2	4	2	3	1	4	4	2	21	2	0	0	1
2																													6	2	6	4	4	2	4	6	2	26	4	1	1	0
2																													3	2	4	4	4	4	4	4	2	21	2	0	0	1
2																													1	1	5	1	4	1	5	4	1	30	3	0	0	1
2																													3	3	3	2	3	2	3	5	1	20	4	0	0	1
2																													2	2	5	2	4	1	5	3	2	27	4	0	1	0
2																													2	1	1	1	1	1	4	6	2	27	4	0	0	1
2																													1	1	5	4	5	2	5	5	2	19	4	0	0	1
2																													1	1	4	2	4	1	4	4	2	27	4	0	0	1
2																													4	3	4	4	5	3	4	4	2	23	2	0	0	1
2																													2	1	5	4	4	3	5	4	1	76	2	0	1	0
2																													5	2	4	4	5	3	4	4	2	64	2	0	1	0
2																													2	2	5	1	1	1	5	2	2	21	4	0	0	1
2																													1	1	5	1	5	1	4	4	2	35	4	1	0	0
2																													2	1	1	1	1	1	1	5	2	32	4	1	0	0
2																													4	4	6	4	6	3	6	4	2	24	4	0	0	1
2																													1	1	3	2	1	2	6	2	2	35	3	0	0	1
2																													2	2	5	5	3	2	3	4	2	63	3	0	0	1
2																													1	1	5	1	1	1	1	1	2	60	4	0	1	0
2																													1	1	1	1	4	4	4	4	2	23	4	0	0	1
2																													2	1	5	1	3	1	6	6	2	19	4	0	0	1
2																													2	2	5	6	4	4	6	6	2	31	4	1	0	0
2																													1	1	1	1	1	1	2	2	1	29	2	0	0	1
2																													2	2	5	2	1	1	5	5	1	30	4	0	0	1
2																													1	1	3	3	2	3	4	4	2	33	3	1	0	0
2																													1	1	1	1	1	1	1	1	3	30	2	1	0	0
2																													2	3	4	3	4	2	3	2	2	63	4	0	1	0
2																													2	1	5	2	5	1	3	2	2	21	4	0	1	0
2																													4	2	5	3	2	3	3	5	1	30	3	0	0	1
2																													1	1	4	4	5	1	6	6	2	22	1	0	1	0
2																													3	3	5	5	5	3	5	5	1	29	4	1	0	0
2																													3	2	5	4	5	4	5	5	2	55	3	0	1	0
2																													3	3	4	4	4	4	4	4	1	24	4	0	0	1
2																													2	1	2	3	2	2	2	4	2	46	3	0	0	1
2																													3	3	5	5	6	3	3	3	1	32	3	1	0	0
2																													4	4	5	5	5	5	5	3	2	62	4	0	0	1
2																													4	3	5	1	5	1	4	2	1	23	2	0	0	1
2																													1	1	6	2	5	1	3	1	2	36	4	0	0	1
2																													4	2	5	3	3	2	3	2	2	52	4	0	0	1
2																													1	1	4	2	4	2	4	4	2	60	4	0	1	0
2																													1	1	3	3	6	2	4	5	2	24	4	0	0	1
2																													2	2	3	5	2	3	6	6	2	29	4	0	0	1
2																													1	1	1	1	1	1	1	1	2	31	3	1	0	0
2																													2	2	7	6	7	4	6	3	1	58	4	0	0	1
2																													1	1	2	3	3	3	6	5	2	21	3	0	1	0
2																													2	2	5	5	3	2	3	4	2	38	4	0	0	1
2																													2	2	5	1	5	1	4	4	2	21	4	0	0	1
2																													1	1	1	1	1	1	1	1	1	46	2	0	0	1
2																													2	2	2	2	2	2	2	2	2	50	3	1	0	0
2																													1	1	6	4	5	2	4	5	2	50	3	0	0	1
2																													2	2	5	3	4	2	4	6	2	29	4	0	0	1
2																													4	2	5	1	3	2	5	6	2	52	3	1	0	0
2																													3	2	7	4	5	2	4	5	2	40	4	0	0	1
2																													2	3	4	2	2	2	4	3	2	62	2	0	1	0
2																													1	1	5	2	1	1	4	4	2	32	3	0	0	1
2																													3	3	3	3	3	3	4	4	1	27	2	0	1	0
2																													2	2	4	4	4	4	4	4	2	67	4	0	1	0
2																													2	2	6	1	3	1	3	6	3	24	4	0	0	1
2																													2	2	6	3	4	3	3	4	1	41	4	1	0	0
2																													3	2	4	5	4	2	6	6	1	34	4	1	0	0
2																													2	1	6	5	3	1	7	7	2	36	4	1	0	0
2																													1	1	6	1	6	1	6	2	1	29	4	0	1	0
2																													2	1	7	2	4	1	3	4	2	20	4	0	1	0
2																													4	3	5	3	4	4	4	3	2	26	4	0	0	1
2																													2	1	5	4	1	4	5	4	1	45	4	1	0	0
2																													2	2	4	4	4	2	4	4	2	36	4	1	0	0
2																													1	1	1	1	1	1	3	4	2	30	3	1	0	0
2																													2	2	2	1	2	1	2	5	1	34	4	0	0	1
2																													2	1	5	4	4	1	1	1	1	49	2	0	1	0
2																													2	2	2	2	1	2	2	2	2	24	4	0	0	1
2																													1	1	6	1	5	1	5	2	2	39	4	0	0	1
2																													1	1	6	2	2	1	4	2	2	58	4	0	1	0
2																													2	2	7	3	5	1	4	6	2	24	4	0	0	1
2																													4	3	5	4	5	3	4	4	1	43	4	1	0	0
2																													3	2	5	3	3	3	4	5	2	42	4	0	1	0
2																													2	2	2	2	2	2	2	2	1	51	3	0	0	1
2																													1	1	5	4	5	3	1	1	1	29	3	0	1	0
2																													2	1	6	1	3	2	4	4	1	26	4	0	0	1
2																													5	2	6	1	7	1	6	3	1	52	4	0	0	1
2																													3	3	2	4	2	2	2	3	2	29	4	0	0	1
2																													1	1	1	2	2	2	2	1	1	19	3	0	0	1
2																													2	2	5	3	2	2	3	6	2	25	4	0	0	1
2																													1	1	4	1	4	1	2	3	1	37	3	1	0	0
2																													1	1	7	5	5	4	6	7	3	22	4	0	0	1
2																													2	2	1	1	1	1	4	4	2	48	4	0	0	1
2																													5	4	5	5	5	2	5	5	2	21	3	0	0	1
2																													3	2	4	2	3	2	5	4	1	32	3	0	0	1
2																													1	1	2	1	2	1	1	2	2	26	4	0	0	1
2																													3	3	6	2	6	2	4	5	2	44	3	1	0	0
2																													1	1	6	5	6	2	4	4	1	35	4	1	1	0
2																													2	2	6	6	5	5	6	6	2	19	4	0	1	0
2																													2	2	4	4	2	2	3	5	2	54	4	0	0	1
2																													3	2	5	2	6	5	6	6	1	25	3	1	0	0
2																													4	3	4	3	3	2	4	4	2	31	4	0	0	1
2																													3	2	5	6	5	3	4	4	2	19	2	0	0	1
2																													2	2	5	4	3	2	5	5	2	24	4	0	0	1
2																													1	1	3	3	2	1	3	4	2	45	3	0	1	0
2																													1	1	5	2	5	2	4	4	2	19	4	0	0	1
2																													2	1	6	5	2	4	5	6	2	21	4	0	0	1
2																													3	2	5	3	4	2	4	4	2	19	4	0	0	1
2																													2	2	2	2	2	2	2	2	2	22	4	0	0	1
2																													3	1	5	2	2	2	4	4	2	31	2	0	0	1
2																													1	1	1	1	1	1	2	1	2	28	4	0	0	1
2																													2	2	4	4	3	3	6	5	2	20	4	0	0	1
2																													2	2	2	2	1	1	4	2	2	40	4	0	0	1
2																													2	2	4	2	2	1	2	2	2	43	4	1	0	0
2																													2	1	4	2	2	1	5	5	2	33	2	1	0	0
2																													2	3	6	6	5	4	5	4	2	27	4	0	0	1
2																													4	3	5	1	4	1	4	3	2	30	4	0	0	1
2																													3	2	5	5	5	4	5	5	2	25	2	0	0	1
2																													3	2	3	2	4	3	4	4	2	56	3	0	1	0
2																													2	1	6	4	4	3	6	6	2	49	2	0	0	1
2																													1	1	1	1	3	1	5	5	1	28	2	0	0	1
2																													4	4	4	4	3	2	5	5	2	24	4	0	0	1
2																													3	2	6	2	5	2	4	5	2	55	4	0	0	1
2																													3	2	5	3	3	2	3	3	2	38	4	0	0	1
2																													2	2	3	2	2	2	2	2	1	34	4	1	0	0
2																													2	2	4	4	4	4	4	4	2	35	4	0	0	1
2																													5	4	1	1	1	1	1	1	2	57	4	0	0	1
2																													2	1	5	4	7	4	6	6	2	51	4	1	0	0
2																													2	2	6	6	6	5	6	6	2	30	4	0	0	1
2																													1	1	5	5	5	1	6	6	2	59	4	0	1	0
2																													1	1	4	4	4	4	4	4	2	24	3	0	0	1
2																													1	1	5	3	4	1	5	4	1	23	4	0	0	1
2																													1	1	1	1	1	1	1	5	1	23	4	0	0	1
2																													4	3	4	5	4	3	5	5	2	20	2	0	0	1
2																													2	2	4	1	4	1	4	2	2	57	3	0	1	0
2																													1	1	3	2	5	3	5	5	2	40	2	0	0	1
2																													2	1	6	3	4	3	5	5	2	61	4	0	0	1
2																													2	1	5	1	1	1	1	4	1	55	4	0	0	1
2																													1	1	7	2	7	2	7	2	2	40	4	0	0	1
2																													3	2	5	5	3	3	5	4	1	63	4	0	0	1
2																													2	2	1	1	1	1	1	4	2	34	4	0	0	1
2																													3	2	4	3	5	3	5	4	2	57	2	0	1	0
2																													2	2	5	3	5	2	5	5	2	36	4	0	0	1
2																													1	1	6	3	1	1	5	5	2	50	3	1	0	0
2																													3	2	5	3	5	4	5	3	2	47	4	0	0	1
2																													2	2	2	2	2	2	2	6	1	28	4	0	0	1
2																													2	2	6	4	5	2	3	6	2	50	4	0	0	1
2																													2	2	4	4	3	3	6	5	1	48	4	1	0	0
2																													1	1	1	1	1	1	7	7	2	29	2	0	1	0
2																													1	2	5	5	1	1	4	6	2	19	3	0	0	1
2																													5	1	5	5	1	3	3	4	2	23	2	0	0	1
2																													3	2	3	2	2	2	2	3	2	24	2	1	0	0
2																													4	3	3	2	5	1	5	5	2	24	4	0	0	1
2																													2	1	4	3	4	2	5	5	2	22	4	0	0	1
2																													1	1	5	4	5	4	5	4	3	31	2	0	0	1
2																													3	2	5	5	3	3	2	4	1	26	4	0	1	0
2																													2	2	5	5	5	2	2	2	2	60	3	0	0	1
2																													1	1	6	4	6	3	4	4	2	33	2	0	0	1
2																													3	3	5	4	4	4	5	4	2	25	4	0	0	1
2																													2	2	2	2	4	4	4	6	2	29	2	0	0	1
2																													2	2	4	4	2	2	4	4	2	42	4	0	1	0
2																													2	2	4	4	3	2	5	5	1	61	4	0	0	1
2																													3	1	7	1	1	1	7	7	2	61	4	0	0	1
2																													2	2	1	1	1	1	2	5	2	40	3	1	0	0
2																													3	2	5	1	4	1	5	4	2	60	2	0	0	1
2																													1	1	4	1	4	3	4	3	2	28	2	0	0	1
2																													2	2	6	5	5	3	5	5	2	27	4	0	0	1
2																													2	3	2	2	2	2	2	2	2	40	2	1	0	0
2																													1	1	5	2	5	1	5	6	2	19	4	1	0	0
2																													1	1	1	1	1	1	1	1	1	40	4	1	0	0
2																													3	3	6	5	6	3	5	1	2	27	3	0	1	0
2																													1	1	5	1	4	1	5	5	2	35	4	0	1	0
2																													3	2	5	5	3	2	4	5	2	27	3	0	0	1
2																													2	1	2	2	1	1	2	4	2	24	4	0	0	1
2																													1	1	4	4	3	4	4	4	2	31	4	1	0	0
2																													2	2	7	2	6	2	7	7	2	79	3	0	1	0
2																													1	1	7	3	6	1	3	5	2	24	3	0	0	1
2																													2	2	5	3	5	2	5	5	2	25	4	0	0	1
2																													1	1	4	5	5	3	5	5	1	38	3	1	0	0
2																													2	1	6	1	5	1	4	4	1	23	3	0	0	1
2																													1	1	4	4	4	4	4	4	2	25	4	0	0	1
2																													2	2	4	1	3	1	3	4	3	29	2	0	0	1
2																													2	2	6	2	4	2	5	5	2	21	3	0	0	1
2																													3	1	5	2	2	1	2	2	2	20	3	0	0	1
2																													1	1	5	4	5	2	5	3	2	31	3	0	0	1
2																													1	1	4	1	2	1	1	4	2	24	4	0	0	1
2																													2	2	5	4	4	4	4	4	2	42	3	1	0	0
2																													1	1	4	2	3	2	4	4	2	23	4	0	0	1
2																													1	1	6	3	3	3	6	1	2	72	4	0	0	1
2																													1	1	5	5	4	3	5	5	2	29	2	1	0	0
2																													1	1	4	4	5	3	5	3	1	25	2	0	1	0
2																													3	3	5	4	5	3	4	4	2	51	3	0	1	0
2																													1	1	7	5	6	5	5	4	1	53	4	0	0	1
2																													3	1	1	1	1	1	1	1	2	50	3	1	0	0
2																													2	2	6	5	4	3	5	6	1	50	2	0	0	1
2																													2	2	6	5	5	3	5	6	1	51	4	0	1	0
2																													2	2	7	4	6	3	5	6	2	54	2	1	0	0
2																													2	2	2	2	1	1	2	5	2	53	2	0	0	1
2																													2	2	5	1	4	1	4	4	2	51	4	0	0	1
2																													1	1	1	1	1	1	1	1	2	36	4	1	0	0
2																													2	1	4	4	7	4	6	3	2	53	4	0	0	1
2																													1	1	4	1	4	1	5	5	1	56	3	0	0	1
2																													2	2	5	5	3	3	5	5	2	35	2	0	0	1
2																													2	2	1	1	1	1	1	1	1	52	3	0	0	1
2																													1	1	5	5	5	4	6	6	2	29	2	1	0	0
2																													2	1	5	2	2	4	4	4	2	22	3	0	0	1
2																													3	3	5	1	6	1	5	5	1	51	4	0	0	1
2																													3	1	4	6	5	4	7	4	2	58	3	0	0	1
2																													2	1	6	4	5	2	5	5	2	60	3	0	0	1
2																													2	2	5	2	4	2	5	4	1	40	3	0	1	0
2																													1	1	1	1	4	4	4	4	1	49	3	0	0	1
2																													3	1	5	3	1	1	5	6	2	29	4	0	1	0
2																													2	1	6	3	1	1	6	6	1	24	2	0	0	1
2																													1	1	5	5	2	4	7	7	2	20	3	0	0	1
2																													1	1	3	1	3	3	4	4	1	52	2	1	0	0
2																													1	1	5	4	6	2	4	3	1	19	4	0	0	1
2																													1	1	4	3	4	3	4	4	2	27	4	1	0	0
2																													1	1	5	1	3	1	5	2	2	20	3	0	0	1
3	4	3	2	1	4	5	4	3	1	20	5	1	0	0
3	1	1	4	2	4	2	4	4	2	31	5	0	0	1
3	1	1	7	6	4	3	6	6	2	32	5	1	0	0
3	1	1	5	4	4	4	4	4	2	26	5	0	0	1	1	1	1	1	1	1	1	1	2	27	5	0	1	0
3	1	2	4	2	2	2	4	3	2	26	6	0	0	1
3	1	1	7	6	7	7	7	7	2	60	4	0	0	1	2	1	7	7	7	5	7	7	2	61	4	0	1	0	1	1	7	7	7	7	7	7	2	62	4	0	1	0
3	1	1	7	3	7	4	4	7	1	35	6	0	0	1
3	2	2	6	5	6	4	6	5	1	30	2	1	0	0	2	1	3	4	3	3	4	5	1	31	2	1	0	0	2	1	5	3	5	2	6	5	1	32	2	1	0	0
3	1	1	6	2	5	5	6	6	1	21	5	0	0	1
3	1	1	7	7	7	3	7	7	2	21	3	0	1	0
3	2	2	6	6	6	2	6	6	1	26	5	1	0	0
3	1	1	5	3	6	3	3	5	2	27	3	0	0	1	2	1	6	1	5	3	6	6	2	28	5	0	0	1	2	2	5	1	5	1	5	5	2	29	4	0	0	1
3	2	1	7	3	5	2	5	5	2	22	5	0	0	1
3	2	2	5	6	6	5	5	5	1	19	5	0	0	1	1	1	4	5	5	3	5	5	1	20	3	0	0	1
3	1	1	7	5	4	1	6	6	2	37	6	0	0	1	1	1	6	5	3	2	5	4	2	38	6	0	0	1	2	1	5	3	4	2	5	5	2	39	6	0	0	1
3	2	1	5	1	7	4	6	7	1	29	7	0	0	1	3	3	6	4	7	2	5	4	1	29	7	0	0	1
3	2	1	6	3	6	3	6	6	1	23	5	0	0	1
3	2	1	7	3	6	3	6	5	2	23	6	0	0	1
3	1	1	5	2	7	1	4	5	1	35	5	1	1	0	1	1	5	4	4	1	5	6	1	36	5	1	1	0
3	1	1	5	4	4	3	5	4	2	27	4	0	0	1	2	1	6	5	5	4	6	5	2	28	4	1	1	0
3	1	1	5	3	2	1	5	5	2	21	5	0	0	1	1	1	5	5	5	2	5	4	2	22	6	0	0	1	1	1	5	2	3	2	4	3	2	23	6	0	0	1
3	2	1	6	6	6	6	6	6	2	27	6	0	0	1
3	1	1	7	4	7	6	7	7	2	35	2	1	0	0	2	1	4	4	1	4	6	6	2	36	2	1	0	0	1	1	5	4	5	5	5	4	2	39	2	1	0	0
3	1	1	6	5	6	3	5	5	2	32	5	1	0	0	1	1	5	5	5	4	5	5	2	33	5	1	0	0
3	2	2	4	4	4	5	5	5	2	26	4	1	0	0	2	2	3	5	3	4	4	4	2	27	4	1	0	0
3	1	1	7	6	6	5	7	5	2	45	4	1	1	0
3	2	1	4	4	4	4	4	5	2	42	5	0	0	1	1	1	4	4	4	2	3	3	2	43	5	0	1	0	2	2	4	4	4	4	4	4	2	44	5	0	0	1
3	2	2	5	4	4	3	5	3	2	33	5	1	0	0	2	1	6	4	3	3	1	7	2	33	5	1	0	0
3	1	1	6	5	7	3	6	4	2	34	5	1	0	0
3	1	1	7	6	6	4	6	7	2	39	5	0	1	0	2	1	5	6	3	2	5	5	2	40	5	0	0	1
3	4	3	6	6	7	5	7	6	2	55	4	0	0	1	2	2	5	5	6	3	5	5	2	56	4	0	0	1	3	3	5	5	5	4	5	5	2	57	4	0	0	1
3	1	1	7	5	7	3	7	7	2	56	2	0	0	1
3	1	1	7	5	6	3	5	5	2	33	4	1	0	0
3	1	1	6	1	6	1	5	2	2	28	4	0	0	1	4	4	1	1	1	1	1	1	2	29	4	0	0	1
3	1	1	4	1	4	1	4	4	1	47	6	1	0	0	1	1	1	1	1	1	1	1	1	47	7	1	0	0	1	1	5	2	6	1	4	5	1	49	7	1	0	0
3	1	1	6	1	7	1	6	6	1	31	5	0	0	1
3	1	1	6	2	6	1	6	7	2	47	6	0	0	1	1	1	6	3	5	1	5	6	2	48	6	0	0	1	1	1	6	1	5	1	6	6	2	49	6	0	1	0
3	1	1	6	6	6	2	6	5	1	24	5	0	0	1
3	1	1	7	5	6	2	7	7	2	20	5	0	0	1
3	1	1	7	1	5	1	6	6	2	33	5	1	0	0
3	1	1	6	2	7	2	5	6	2	24	7	0	0	1	2	2	5	4	7	2	5	5	2	25	7	0	0	1
3	3	2	5	5	6	5	5	6	2	19	3	0	0	1
3	1	1	5	1	3	1	4	6	2	40	5	1	0	0	1	1	5	2	3	2	3	3	2	41	5	1	0	0
3	1	1	6	6	6	6	6	6	2	20	3	1	1	0
3	1	1	6	2	6	3	4	4	1	37	4	1	0	0	2	1	6	4	5	2	6	6	1	38	4	1	0	0
3	2	2	6	4	7	4	5	6	2	20	3	0	0	1	1	1	4	2	4	2	5	5	2	21	3	0	0	1
3	3	1	6	1	3	1	5	3	1	18	3	1	1	0	1	1	6	5	5	1	6	5	1	19	5	1	1	0
3	1	1	5	3	5	3	5	6	2	31	6	0	0	1
3	3	3	5	5	4	4	4	4	1	29	6	0	0	1	4	2	4	5	4	5	4	5	1	30	6	0	0	1	3	3	4	4	1	1	5	6	1	31	6	1	0	0
3	2	1	6	6	6	4	6	7	2	39	5	1	0	0
3	1	1	7	4	7	4	7	4	2	34	5	1	0	0	1	1	4	4	2	4	5	4	2	35	5	1	0	0
3	1	1	5	5	4	4	5	5	2	47	5	1	0	0	1	1	6	4	2	2	2	5	2	47	5	1	0	0	1	1	4	4	4	4	2	5	2	48	5	1	0	0
3	2	1	5	2	5	1	5	5	2	24	6	0	0	1	3	2	5	4	5	1	4	5	2	25	6	0	0	1	1	2	5	1	4	1	2	4	2	26	6	0	0	1
3	2	2	5	3	4	3	5	5	2	42	2	1	0	0	2	2	5	6	5	3	6	6	2	43	2	1	0	0	2	2	5	2	3	2	5	5	2	44	2	0	0	1
3	1	1	6	5	6	3	5	5	2	40	6	1	0	0	1	1	6	5	5	5	4	6	2	41	6	1	0	0	1	1	5	5	5	4	5	5	2	42	6	1	0	0
3	1	1	7	7	7	4	4	4	1	33	2	1	0	0
3	2	2	6	5	6	2	5	3	2	26	2	0	0	1	1	1	7	6	6	5	6	7	2	27	2	0	0	1	1	1	6	3	5	2	3	3	2	28	2	0	0	1
3	3	1	6	4	4	3	5	5	2	23	5	0	0	1	1	1	7	1	4	2	6	7	2	24	5	0	0	1	3	2	5	5	4	4	5	5	2	25	5	0	0	1
3	1	1	6	4	6	4	5	5	2	24	5	0	0	1
3	1	1	7	1	7	1	6	6	1	22	6	0	1	0
3	5	4	1	1	1	1	1	2	1	19	3	0	0	1	2	2	1	1	1	1	1	1	1	20	3	1	1	0
3	1	1	7	1	4	1	4	4	2	46	6	0	0	1
3	2	1	7	3	5	3	5	5	2	52	5	1	1	0	4	1	7	7	5	4	3	7	2	53	5	0	0	1	1	1	5	3	2	3	5	4	2	54	5	0	0	1
3	1	1	7	6	7	3	7	7	1	51	3	0	0	1	1	1	7	5	7	2	7	7	1	51	3	0	0	1	2	2	5	5	5	5	5	5	1	53	3	0	0	1
3	4	3	7	5	7	6	7	7	2	19	5	0	0	1
3	1	1	6	3	5	2	6	6	2	67	2	0	1	0	1	1	5	5	6	3	5	4	2	68	1	0	1	0
3	1	1	5	2	1	1	4	5	2	33	5	0	0	1	1	1	4	4	2	2	2	3	2	34	5	0	0	1
3	1	1	6	5	6	1	5	4	1	37	5	0	1	0	1	1	4	2	3	1	3	2	1	38	5	0	0	1	1	1	5	3	5	2	5	3	1	39	5	0	0	1
3	1	1	6	4	6	4	6	7	2	22	6	0	0	1
3	1	1	6	2	4	2	4	4	2	49	5	1	0	0	2	1	4	3	4	3	3	4	2	50	5	1	0	0	1	1	5	2	4	2	4	4	2	51	5	1	0	0
3	2	1	6	2	6	2	6	5	2	58	3	0	0	1
3	1	1	6	2	6	1	6	6	2	18	3	0	0	1	1	1	4	2	2	1	3	4	2	19	3	0	0	1
3	3	2	7	6	5	3	6	5	1	47	7	1	0	0	2	1	7	3	2	3	5	4	1	48	7	1	1	0	3	2	6	3	5	2	5	5	1	49	7	1	0	0
3	2	1	7	7	4	2	6	5	2	21	3	0	0	1
3	1	1	6	6	6	4	6	6	2	21	3	1	0	0
3	1	1	6	4	3	1	6	6	1	31	3	0	1	0
3	1	1	5	1	6	1	4	5	1	44	6	1	0	0	2	1	2	1	6	1	3	2	1	45	6	1	0	0
3	1	1	6	6	7	4	6	6	2	37	5	0	0	1
3	2	1	7	6	7	5	7	6	2	18	3	0	0	1
3	1	1	6	3	3	2	7	6	2	32	5	0	0	1
3	2	1	7	7	7	6	7	6	2	44	4	1	1	0	4	2	4	4	5	4	5	4	2	44	2	1	0	0	3	1	4	4	6	4	4	4	2	45	4	1	0	0
3	2	1	6	4	5	3	4	5	2	47	5	0	0	1	1	1	4	3	3	1	4	5	2	48	5	0	0	1	2	1	5	2	4	2	3	6	2	49	5	0	0	1
3	1	1	6	6	5	5	6	6	2	37	5	1	0	0	1	1	6	4	4	1	6	6	2	38	6	1	0	0	2	2	4	4	4	4	4	4	2	38	5	1	0	0
3	1	2	6	6	4	7	3	4	2	22	4	0	0	1	4	3	6	2	5	1	2	6	2	23	4	0	0	1	2	2	5	3	2	3	2	2	2	24	3	0	0	1
3	5	2	7	6	7	2	7	7	2	28	4	1	0	0
3	3	3	5	4	5	4	4	4	2	51	4	0	1	0	3	3	5	4	4	4	5	4	2	52	4	0	0	1	4	3	4	4	5	5	5	4	2	53	4	0	1	0
3	1	1	6	2	3	1	5	6	1	57	5	0	0	1	2	1	4	1	3	1	1	3	1	58	5	0	1	0	1	1	4	2	4	1	1	4	1	59	5	0	0	1
3	1	1	7	1	7	1	7	6	2	27	5	0	0	1
3	2	1	7	4	7	5	7	7	1	43	6	0	0	1
3	1	1	6	3	6	1	5	6	1	24	6	0	0	1
3	1	1	6	5	5	2	5	3	1	18	3	0	0	1
3	2	2	7	6	7	5	5	6	1	30	3	0	1	0	2	2	4	4	2	2	1	5	1	31	2	0	0	1
3	2	2	6	4	6	3	6	3	1	62	3	0	0	1	3	3	5	4	5	4	5	3	1	63	3	0	0	1	2	2	4	3	4	2	5	4	1	64	3	0	0	1
3	1	1	7	5	6	4	6	6	2	62	3	0	0	1	2	2	6	4	6	4	5	6	2	63	3	0	0	1	3	3	6	2	5	2	4	4	2	64	3	0	0	1
3	4	2	6	4	5	5	5	5	1	31	5	0	0	1
3	1	1	7	7	7	3	7	6	2	40	5	1	0	0	3	1	6	3	6	3	6	6	2	41	5	1	0	0
3	1	1	7	6	7	6	7	6	1	20	5	0	0	1
3	2	2	5	5	5	4	5	5	2	53	4	1	1	0	2	2	5	4	4	4	5	4	2	54	4	1	0	0	2	2	5	5	4	4	4	5	2	55	3	1	1	0
3	1	1	6	2	5	3	5	6	2	21	5	0	1	0
3	1	1	5	3	5	3	4	5	1	28	5	0	0	1
3	2	2	6	4	5	2	5	3	2	37	2	0	0	1	3	2	5	5	3	4	5	5	2	38	2	0	0	1
3	3	1	7	7	6	3	7	7	1	59	5	0	0	1	2	1	7	3	6	3	7	6	1	64	5	0	0	1	1	1	7	5	3	2	7	7	1	65	5	0	0	1
3	1	1	5	3	4	4	5	6	2	25	5	0	0	1
3	2	1	7	5	6	2	7	7	2	45	7	0	0	1
3	3	2	5	5	5	2	3	5	1	21	5	0	0	1	2	2	5	3	3	1	5	4	1	22	5	0	0	1
3	2	2	3	4	5	5	5	4	2	20	5	0	0	1	2	2	4	4	6	2	3	4	2	21	5	0	0	1
3	1	1	7	1	5	1	5	5	2	31	5	1	0	0
3	1	1	7	4	5	3	4	6	1	50	7	0	0	1	1	1	6	4	2	2	3	4	1	51	7	0	0	1	1	1	6	3	2	1	2	4	1	52	7	0	0	1
3	1	1	7	7	7	6	7	7	2	28	3	1	0	0
3	1	1	6	6	3	2	7	6	2	55	5	0	0	1	1	1	5	5	5	5	5	5	2	56	5	0	0	1	1	1	6	3	4	1	5	6	2	57	5	0	0	1
3	4	1	7	2	7	3	7	7	2	34	3	0	0	1	1	1	6	1	7	2	6	4	2	35	3	0	1	0
3	1	1	7	3	7	1	7	7	2	30	5	1	0	0	2	1	7	6	6	3	6	6	2	31	5	1	0	0	2	1	6	3	6	3	6	6	2	32	5	1	0	0
3	2	2	5	5	5	3	5	5	1	19	3	0	0	1
3	1	1	5	3	6	1	5	7	2	60	5	0	0	1
3	2	2	7	5	6	2	6	3	2	40	5	1	0	0
3	2	1	7	4	6	3	7	6	2	33	5	1	0	0	2	1	6	3	5	4	6	5	2	34	5	1	0	0	2	1	5	4	5	4	6	5	2	35	5	1	0	0
3	4	4	6	4	4	2	6	6	2	49	5	0	0	1	4	3	4	4	4	4	4	4	2	50	5	0	0	1	2	2	4	4	4	1	4	4	2	51	5	0	0	1
3	1	1	7	1	3	1	4	5	2	41	5	1	0	0	1	1	6	1	3	1	2	2	2	42	5	0	0	1
3	3	6	7	7	5	7	7	6	2	36	3	0	0	1	3	3	4	4	4	4	4	4	2	37	4	0	0	1
3	3	1	7	6	6	2	7	7	2	19	3	0	0	1	3	1	4	4	2	2	2	5	2	20	3	0	0	1
3	1	1	6	6	6	4	6	2	2	34	6	0	0	1	1	1	6	3	5	4	4	2	2	35	5	0	0	1
3	1	1	7	7	7	7	7	7	2	47	2	0	0	1	1	1	7	7	6	4	7	7	2	48	2	0	0	1
3	1	1	6	2	3	2	5	7	1	43	5	0	0	1	1	1	5	2	2	1	2	4	1	44	5	0	0	1	1	1	5	1	3	1	3	5	1	45	5	0	0	1
3	2	1	6	6	5	3	6	6	2	18	4	1	1	0	4	4	6	6	6	2	5	5	2	19	5	0	0	1	4	2	3	3	6	2	6	5	2	20	5	0	1	0
3	3	2	7	2	5	1	5	3	1	30	3	0	0	1	1	1	5	1	5	1	2	4	1	31	3	0	0	1
3	1	1	7	3	6	3	6	6	1	30	3	1	0	0	1	1	7	2	6	2	5	4	1	31	3	1	0	0
3	1	1	7	2	5	1	4	3	2	34	5	0	0	1	1	1	5	3	1	1	4	6	2	35	5	0	0	1
3	2	2	4	2	6	2	6	6	1	26	5	0	1	0
3	1	1	7	7	6	4	4	4	2	39	5	0	0	1
3	2	1	7	1	7	1	7	7	1	20	5	1	1	0	3	5	3	3	3	5	5	5	1	21	5	1	0	0
3	2	1	6	5	7	4	6	7	2	41	6	0	0	1	2	2	5	5	3	2	6	6	2	42	6	0	0	1
3	2	2	7	4	5	2	5	5	2	25	3	0	0	1	2	1	6	5	4	4	6	4	2	26	3	0	0	1	2	2	4	4	4	4	4	4	2	27	3	0	0	1
3	1	1	7	3	6	4	6	6	2	42	4	1	1	0	1	1	6	4	4	2	5	3	2	43	4	1	1	0	1	1	4	4	4	4	5	4	2	44	4	1	1	0
3	2	2	5	5	6	6	7	6	2	27	6	0	0	1
3	2	1	6	2	1	1	3	5	2	28	6	0	0	1	2	1	6	4	4	2	3	3	2	29	6	0	0	1
3	1	1	6	3	6	2	6	1	2	55	2	0	1	0	1	1	5	1	3	1	2	5	2	56	2	1	1	0
3	2	1	7	5	7	4	6	7	2	55	2	0	0	1
3	1	1	6	6	6	4	6	6	2	19	5	0	0	1
3	1	1	5	4	3	2	4	5	2	31	5	1	0	0	1	1	5	2	5	1	2	4	2	32	5	1	0	0
3	1	1	7	7	7	3	7	7	2	53	4	0	0	1	1	1	7	7	7	2	7	7	2	54	3	0	0	1	2	1	5	5	3	3	5	3	2	55	4	0	0	1
3	4	1	4	3	6	6	6	6	2	28	4	0	0	1
3	1	1	7	1	6	1	6	7	2	32	6	0	0	1
3	1	1	7	7	7	7	7	7	2	52	1	0	0	1	3	3	7	7	7	7	7	7	2	53	1	0	0	1	4	4	7	4	2	4	7	7	2	54	1	0	1	0
3	4	5	5	5	5	5	4	4	2	19	2	0	0	1
3	3	2	7	7	7	7	7	7	1	24	2	0	0	1	5	5	7	7	7	6	7	7	1	25	2	0	0	1
3	1	1	7	2	5	1	7	7	2	51	2	0	0	1	1	1	7	4	6	2	5	5	2	52	2	0	0	1	1	1	6	5	5	2	5	6	2	54	2	0	0	1
3	3	1	7	3	6	1	3	7	1	20	3	0	0	1
3	1	1	7	3	5	1	6	4	2	29	5	0	0	1	1	1	6	2	4	2	3	4	2	30	5	0	0	1	1	1	6	4	4	2	5	5	2	31	5	0	0	1
3	2	2	7	4	7	6	7	6	2	27	5	0	0	1	4	3	5	4	5	3	5	5	2	28	5	0	0	1	2	2	6	6	5	3	5	6	2	29	5	0	0	1
3	1	1	6	5	6	4	6	6	2	43	5	1	0	0	1	1	5	2	4	2	3	3	2	44	5	0	0	1	1	1	5	2	5	2	4	3	2	45	5	1	0	0
3	2	1	6	5	6	4	5	7	2	50	5	1	0	0
3	1	1	7	7	7	7	7	7	2	31	5	0	0	1	1	1	5	4	6	4	7	5	2	32	5	0	0	1
3	1	1	7	4	5	4	5	7	2	29	5	1	0	0	1	1	7	4	4	2	6	7	2	30	6	1	0	0	1	1	5	5	6	3	5	6	2	31	6	1	0	0
3	1	1	6	3	7	2	7	7	2	26	5	0	0	1	1	1	5	3	3	3	6	5	2	27	5	0	0	1
3	2	1	6	2	5	2	5	6	1	38	5	0	1	0	2	1	5	2	5	2	5	3	1	39	5	0	0	1	2	2	5	1	4	1	3	2	1	40	5	0	1	0
3	2	2	5	4	5	2	4	3	2	20	5	0	1	0	3	1	6	3	5	2	5	5	2	21	5	0	0	1
3	2	2	5	4	5	4	5	5	2	21	5	0	0	1
3	1	1	7	7	7	7	7	7	2	53	2	0	0	1	1	1	7	7	7	4	7	7	2	54	2	0	0	1
3	3	2	5	5	5	5	5	5	2	19	3	0	0	1
3	1	2	6	6	6	6	6	6	2	24	5	0	0	1	1	1	2	5	2	2	6	6	2	25	5	0	0	1
3	1	1	7	5	7	6	7	7	2	51	4	0	0	1	1	1	6	3	5	2	6	6	2	52	4	0	0	1
3	1	1	7	4	4	3	5	5	2	33	3	1	0	0	1	1	3	3	5	3	3	3	2	34	3	1	0	0	1	1	5	1	6	2	4	1	2	36	3	1	0	0
3	3	2	6	1	1	1	5	5	1	32	5	0	0	1	3	2	2	1	1	1	2	2	1	32	5	0	0	1	2	2	1	1	1	1	1	1	1	33	5	0	0	1
3	1	1	5	1	5	1	5	5	2	23	4	0	0	1	1	1	6	4	3	1	4	4	2	24	4	0	0	1
3	1	1	6	1	6	1	5	4	2	44	6	1	0	0	4	3	4	4	4	3	4	4	2	45	6	1	0	0	2	2	3	3	2	2	5	4	2	46	6	0	1	0
3	1	1	5	2	5	1	5	3	2	20	5	0	0	1
3	2	1	7	3	7	3	6	5	2	40	5	1	0	0	1	1	7	4	7	3	4	3	2	41	5	1	0	0
3	1	1	7	7	7	4	7	7	2	27	5	0	0	1	2	1	6	6	3	1	7	6	2	28	5	0	0	1
3	1	1	7	5	6	3	6	7	2	38	7	0	0	1
3	1	1	7	5	6	2	7	7	1	48	5	0	0	1	1	1	6	2	6	1	5	3	1	48	5	0	0	1
3	2	2	6	3	6	2	5	3	1	27	7	0	0	1
3	1	1	7	3	5	2	5	6	2	30	4	0	0	1
3	3	2	6	6	6	7	7	7	2	26	6	0	0	1
3	1	1	7	2	7	2	7	7	2	22	5	0	0	1
3	1	1	5	1	5	1	4	5	1	21	5	0	0	1
3	1	1	6	6	6	4	5	5	2	44	3	1	0	0	1	1	5	5	5	4	5	5	2	45	2	1	0	0
3	1	1	7	6	6	2	6	6	2	30	4	0	0	1
3	2	1	6	1	5	2	6	7	2	22	5	0	1	0
3	2	2	4	4	2	1	2	5	2	34	5	0	0	1
3	2	2	7	7	7	7	7	7	1	20	2	0	0	1
3	1	1	6	3	4	3	6	5	2	32	5	0	0	1	1	1	5	2	2	1	5	5	2	33	5	0	1	0	1	1	5	3	4	2	5	5	2	34	5	0	0	1
3	2	1	7	5	6	4	7	7	1	43	3	0	0	1	1	1	3	3	4	3	5	4	1	44	4	1	0	0
3	1	1	7	3	6	1	5	4	2	18	3	0	0	1
3	3	1	7	6	7	3	7	7	2	32	6	0	0	1	2	1	7	5	6	2	6	7	2	33	6	0	0	1	1	2	7	3	6	2	6	6	2	34	6	0	0	1
3	1	1	7	4	1	1	4	7	2	28	6	0	0	1	1	1	6	1	1	1	4	5	2	29	7	0	0	1
3	2	1	7	2	5	1	3	4	2	27	5	0	0	1
3	1	1	5	5	7	5	7	6	2	21	3	0	0	1
3	2	1	6	4	6	4	5	5	2	46	6	0	0	1	3	3	5	3	5	2	3	5	2	47	6	0	0	1	2	2	5	3	5	2	4	4	2	48	7	0	0	1
3	2	1	5	3	6	3	5	5	1	24	6	0	0	1	1	1	5	3	5	2	5	4	1	25	7	0	1	0	2	2	5	4	5	1	3	5	1	26	7	0	0	1
3	1	1	7	3	6	3	5	5	2	64	3	0	0	1
3	2	2	4	4	5	3	3	5	2	45	5	0	0	1	1	1	4	4	1	1	2	4	2	46	5	0	0	1
3	1	1	6	5	7	3	6	6	2	28	3	0	0	1	3	1	4	4	4	4	4	4	2	29	3	0	0	1
3	1	1	5	1	4	1	5	6	1	45	5	0	0	1	1	1	5	6	3	1	4	4	1	45	5	0	0	1	1	1	6	3	4	1	5	6	1	46	5	0	0	1
3	1	1	6	1	5	1	6	5	2	28	3	0	0	1
3	2	3	7	2	6	1	5	5	1	20	3	0	0	1
3	1	1	6	6	6	6	6	6	2	41	7	0	0	1
3	1	1	7	6	7	5	6	6	2	23	5	0	0	1
3	1	1	6	5	5	5	6	7	2	20	3	0	0	1	2	1	7	2	2	1	3	3	2	21	5	0	0	1	1	1	6	4	6	2	6	5	2	21	3	0	0	1
3	1	1	6	3	6	3	6	4	2	45	5	0	0	1	4	2	5	2	5	1	5	5	2	46	4	0	0	1	1	1	6	2	3	1	3	4	2	47	5	1	0	0
3	1	1	7	2	6	1	6	2	1	37	7	1	0	0	1	1	7	2	5	1	4	7	1	39	7	1	0	0
3	3	1	4	4	5	4	5	5	2	23	3	0	1	0	2	1	6	4	2	4	5	6	2	24	3	0	0	1
3	1	1	6	5	6	3	6	5	2	49	3	0	0	1	2	2	5	3	4	2	5	5	2	50	3	0	0	1	2	2	4	4	4	2	3	5	2	51	3	0	0	1
3	4	3	6	5	7	5	5	5	2	37	4	0	0	1	4	3	1	1	1	1	1	2	2	38	4	0	0	1	3	2	2	1	1	1	1	1	2	39	4	0	0	1
3	2	1	6	1	5	2	6	6	1	25	3	0	0	1
3	1	1	6	5	6	4	5	6	2	22	5	0	0	1
3	2	2	7	6	6	5	7	7	2	40	5	1	0	0
3	3	2	6	1	2	1	4	4	2	26	5	0	1	0	5	4	5	5	6	1	5	3	2	27	5	0	1	0
3	2	1	6	4	5	4	5	5	2	68	1	0	0	1	1	1	7	3	5	2	5	4	2	69	2	0	0	1
3	1	1	6	3	5	3	6	6	2	36	5	0	0	1
3	2	1	6	5	6	1	6	6	2	21	3	1	1	0	2	1	7	7	7	4	7	5	2	22	5	1	1	0
3	1	1	5	4	5	2	5	5	2	47	5	1	0	0	1	1	5	5	5	5	5	5	2	46	5	1	1	0
3	1	1	7	6	7	4	7	7	1	23	2	1	0	0
3	1	1	7	1	7	2	7	7	2	52	2	0	0	1	1	1	5	3	5	3	5	5	2	53	2	0	0	1	1	1	4	4	4	4	4	4	2	54	3	0	0	1
3	2	1	7	4	6	4	4	5	2	55	5	0	0	1	3	3	6	1	6	1	2	4	2	55	5	0	0	1	1	1	4	1	4	2	2	2	2	55	5	0	0	1
3	1	1	6	4	7	4	6	6	2	30	5	0	1	0
3	1	1	6	2	7	1	7	7	2	46	4	0	0	1	2	1	3	1	1	1	2	2	2	47	4	0	0	1	1	1	1	1	1	1	1	2	2	48	4	0	0	1
3	1	1	7	7	7	3	7	7	2	39	2	0	0	1	2	2	5	5	5	3	5	5	2	40	2	0	0	1	1	1	5	1	1	1	5	5	2	41	2	0	0	1
3	1	1	7	5	7	3	7	5	2	27	5	0	0	1	2	2	5	2	5	5	5	5	2	28	5	0	1	0	1	1	6	1	5	1	5	5	2	29	5	0	0	1
3	1	1	7	4	7	5	7	7	2	50	6	0	0	1	1	1	7	4	6	4	6	7	2	51	6	0	0	1	1	1	6	4	5	3	5	5	2	52	6	0	0	1
3	2	1	5	2	5	2	4	2	2	34	6	0	0	1
3	1	1	7	4	6	2	5	5	2	18	4	1	0	0
3	1	1	6	3	7	4	5	4	2	39	5	0	1	0	1	1	4	4	4	4	4	4	2	40	5	0	0	1
3	2	1	6	2	6	2	5	6	2	24	3	0	0	1
3	2	1	7	4	4	3	6	7	2	46	4	1	0	0	1	1	6	4	4	3	5	4	2	47	3	1	0	0
3	2	2	6	2	4	1	5	7	2	27	4	0	0	1
3	1	1	7	4	7	2	7	2	2	35	5	0	0	1	1	1	6	2	4	1	3	5	2	36	6	0	0	1	2	2	6	2	4	1	4	4	2	37	5	0	0	1
3	1	1	5	3	3	2	3	6	2	21	5	0	0	1	1	1	6	3	3	1	5	6	2	22	5	0	0	1
3	2	1	7	2	7	2	4	5	1	27	5	1	0	0
3	1	1	7	6	1	1	7	2	1	51	3	0	0	1	1	1	2	1	2	1	2	4	1	52	3	0	1	0	2	2	2	1	1	1	4	5	1	53	3	0	1	0
3	2	1	6	3	6	4	5	6	2	28	4	0	0	1
3	1	1	5	5	5	2	6	2	2	68	5	0	0	1	2	1	5	3	5	1	5	2	2	69	5	0	0	1	1	1	6	4	5	2	4	4	2	70	5	0	0	1
3	1	1	5	1	7	2	5	5	1	19	5	0	0	1
3	1	1	7	5	7	4	6	7	1	34	3	1	0	0	2	1	6	4	5	5	6	7	1	35	3	1	0	0	1	1	5	2	6	1	6	7	1	36	3	1	0	0
3	2	1	6	1	4	2	5	4	1	20	5	0	0	1
3	1	1	6	2	6	1	6	3	2	62	3	0	0	1
3	1	1	6	5	6	2	5	4	2	37	5	0	0	1
3	1	1	5	5	6	4	5	4	2	43	6	0	0	1
3	1	1	7	5	7	5	7	4	1	55	6	0	0	1	1	1	7	6	5	3	6	4	1	56	5	0	0	1	1	1	7	6	5	5	6	4	1	57	5	0	0	1
3	2	2	6	4	4	4	6	5	2	33	5	1	0	0	2	2	4	4	4	4	4	4	2	34	5	1	1	0
3	2	2	7	1	6	1	6	7	2	44	3	1	0	0	6	6	6	2	2	1	5	6	2	45	3	1	0	0
3	1	1	6	6	6	3	6	7	2	40	4	0	0	1	2	2	6	6	4	3	6	5	2	41	4	0	0	1	1	1	7	7	7	2	7	6	2	42	4	0	0	1
3	1	1	7	3	7	2	7	7	2	41	6	1	0	0	1	1	6	3	5	3	5	5	2	42	6	1	0	0	1	1	5	3	5	1	4	5	2	43	6	1	0	0
3	1	1	5	1	3	2	4	6	1	45	5	1	0	0
3	3	2	6	5	4	4	6	5	2	54	4	1	0	0	2	2	5	5	5	4	5	5	2	55	4	1	0	0	3	2	5	5	3	3	5	5	2	56	4	1	0	0
3	1	1	7	3	7	2	7	2	2	35	5	0	1	0
3	1	1	7	6	7	6	7	7	2	54	2	0	0	1	1	1	5	3	6	2	4	5	2	55	2	0	0	1
3	1	1	5	6	5	5	6	5	1	19	5	0	0	1
3	1	1	7	4	6	4	5	3	2	41	3	0	0	1
3	1	1	5	3	6	1	5	6	1	21	5	0	0	1
3	1	1	6	6	6	4	6	6	2	57	2	0	0	1	1	1	5	6	5	3	5	5	2	58	2	0	0	1	2	1	5	4	2	2	4	5	2	59	2	0	1	0
3	1	1	7	2	2	2	7	2	2	36	3	1	1	0	1	1	6	6	6	5	5	6	2	37	4	1	0	0	1	1	5	5	5	5	3	5	2	38	4	1	0	0
3	1	1	6	4	5	1	6	6	2	48	4	1	0	0	1	1	4	4	4	1	5	5	2	49	3	1	0	0	1	1	4	1	3	1	4	5	2	50	3	1	0	0
3	2	1	6	4	6	4	5	6	2	22	5	0	0	1	1	1	5	5	5	4	5	5	2	23	5	0	0	1
3	1	1	6	5	5	5	6	5	2	62	2	0	1	0	1	1	5	4	5	4	6	5	2	62	2	0	1	0	1	1	5	4	5	4	4	3	2	64	2	0	1	0
3	2	1	7	4	6	3	6	5	2	58	3	0	0	1
3	1	1	7	4	5	1	5	5	2	51	5	0	1	0	2	1	7	4	6	1	5	3	2	52	5	0	1	0	2	1	6	5	5	3	4	4	2	53	5	0	1	0
3	3	2	6	5	7	4	5	6	2	22	5	0	0	1
3	1	1	5	4	5	4	5	5	2	57	2	0	0	1
3	1	1	7	3	7	3	6	6	2	24	6	0	0	1
3	2	2	6	6	5	4	5	5	2	49	3	1	0	0	1	1	6	6	5	4	5	4	2	50	3	1	0	0	1	1	2	2	2	2	6	4	2	52	4	1	0	0
3	2	2	5	5	3	4	5	6	2	43	4	1	0	0	2	1	5	3	5	3	6	5	2	44	5	1	0	0	1	1	5	5	3	3	5	5	2	45	5	0	0	1
3	1	1	3	7	3	6	6	7	2	60	4	0	1	0	1	1	5	4	3	2	6	5	2	61	4	0	1	0	1	1	4	4	4	4	4	4	2	62	2	0	0	1
3	1	1	7	4	5	3	7	7	1	59	5	0	1	0
3	2	2	6	6	6	4	6	6	2	36	6	1	0	0
3	1	1	7	7	7	7	7	5	2	26	5	0	0	1	5	4	6	4	6	3	6	6	2	27	5	1	0	0
3	1	1	3	1	1	1	1	1	1	31	5	0	0	1
3	1	1	7	2	5	1	5	1	2	34	5	1	0	0	1	1	5	5	5	2	5	5	2	35	5	1	0	0	2	2	5	5	5	5	5	5	2	36	6	1	0	0
3	1	1	7	7	7	7	7	7	2	51	2	0	1	0	1	1	7	4	7	4	5	7	2	52	3	0	1	0	1	1	4	1	1	1	7	7	2	53	3	0	1	0
3	1	1	6	5	6	2	5	6	2	40	5	0	0	1	2	1	7	3	5	2	5	6	2	41	5	0	1	0	2	1	7	5	6	3	5	6	2	42	5	0	1	0
3	1	1	7	4	7	6	7	7	2	27	5	0	0	1	1	1	3	3	3	1	6	4	2	28	5	0	0	1
3	1	1	7	3	7	3	7	7	1	58	4	0	0	1	1	1	7	7	7	5	7	7	1	59	4	0	0	1	2	2	7	1	7	1	7	1	1	60	4	0	0	1
3	1	1	6	1	6	1	5	6	2	20	5	0	1	0
3	1	1	5	3	5	3	5	4	1	34	6	0	0	1	2	2	4	3	4	2	4	5	1	35	5	0	0	1
3	2	1	7	3	7	5	6	5	1	42	5	0	1	0
3	1	1	6	3	6	2	6	2	2	45	3	0	0	1	2	2	6	4	5	2	5	2	2	46	3	0	0	1	2	2	6	2	4	2	4	4	2	47	3	0	0	1
3	1	1	7	2	6	2	6	6	2	29	2	1	0	0
3	1	1	7	3	7	3	7	7	2	39	5	1	0	0	2	1	5	1	7	1	5	6	2	40	5	1	0	0
3	3	1	7	4	5	4	7	5	2	30	2	0	0	1	2	1	4	4	3	4	4	4	2	31	2	1	0	0
3	1	1	7	3	7	3	7	6	2	49	5	0	0	1	1	1	6	3	6	3	6	4	2	51	5	0	1	0
3	1	1	6	3	5	3	3	3	2	20	3	0	0	1
3	1	1	7	6	6	5	6	7	2	35	2	1	0	0	1	1	6	5	4	4	5	4	2	36	2	1	0	0	5	4	4	5	5	5	6	5	2	38	2	1	1	0
3	1	1	7	5	7	2	7	6	1	31	5	1	0	0
3	1	1	6	6	6	5	6	6	1	45	2	1	0	0	1	1	6	6	4	4	5	5	1	46	2	1	0	0	1	1	4	4	4	4	5	5	1	47	2	1	0	0
3	2	1	6	5	5	2	5	2	1	19	5	0	0	1
3	1	1	7	2	7	2	4	4	2	62	7	0	0	1	1	1	4	1	5	1	4	5	2	63	7	0	0	1	1	1	2	2	6	1	4	4	2	64	7	0	1	0
3	3	2	7	1	7	1	7	7	2	32	5	1	0	0	2	1	3	1	1	1	1	1	2	33	5	1	0	0	2	1	2	1	2	1	2	4	2	34	5	1	0	0
3	1	1	7	6	6	6	6	6	2	27	5	1	0	0
3	1	1	4	4	5	4	6	4	2	21	5	1	1	0	1	1	4	2	4	2	4	4	2	22	5	1	0	0	2	2	2	1	2	1	2	6	2	23	5	1	0	0
3	2	2	5	5	4	3	5	5	2	50	4	0	0	1	2	2	5	4	4	3	5	4	2	51	4	0	0	1
3	1	1	7	6	6	6	5	5	1	30	3	0	0	1	1	1	4	3	6	1	3	3	1	31	3	0	0	1
3	3	3	6	6	5	5	6	6	2	34	5	0	0	1
3	1	1	7	6	6	2	7	5	2	61	4	0	0	1	2	2	6	5	5	2	6	3	2	62	4	0	1	0	1	1	5	4	6	3	4	4	2	63	4	0	0	1
3	1	1	7	4	7	4	7	7	2	64	4	0	1	0	1	1	7	4	7	3	7	7	2	64	4	0	0	1	1	1	6	3	7	1	7	6	2	65	4	0	1	0
3	1	1	7	2	7	2	3	5	2	58	4	0	0	1	1	1	7	2	7	2	6	6	2	59	4	0	1	0	2	2	5	1	5	2	5	5	2	60	2	0	0	1
3	1	1	6	6	6	6	6	6	1	39	3	1	0	0
3	1	1	7	4	6	4	5	7	1	48	6	0	0	1	1	1	5	4	6	5	5	4	1	49	6	0	0	1	1	1	6	4	6	4	6	6	1	50	6	0	1	0
3	2	2	6	5	7	4	6	6	2	34	6	1	1	0
3	1	1	7	4	7	4	7	7	1	33	3	0	0	1	3	2	7	4	7	4	7	5	1	34	5	0	0	1	1	1	5	3	5	3	5	6	1	35	3	0	0	1
3	1	1	7	6	7	6	6	7	2	65	6	0	1	0	2	2	3	3	5	3	4	4	2	66	5	0	0	1	2	2	6	2	4	2	4	4	2	67	5	0	1	0
3	1	1	7	5	7	1	7	5	1	30	7	0	0	1
3	2	1	7	4	7	5	6	6	2	49	3	1	1	0	3	1	5	4	6	4	4	4	2	50	4	1	0	0	2	1	5	4	5	1	5	4	2	51	4	1	0	0
3	3	3	7	5	7	4	7	7	2	21	5	0	0	1	3	1	5	5	5	5	5	5	2	22	5	0	0	1
3	1	1	7	5	6	5	4	5	2	26	2	1	0	0	1	1	5	4	4	2	3	4	2	27	2	1	0	0	1	1	5	5	5	2	6	4	2	28	2	1	0	0
[truncated: 2,726 more rows]

## Sheet: questionnaire
				Japanese	English	Italian	Chinese
		IMC		たくさんの質問がありますが、それぞれよく読んでお答えいただく必要がありますので、 まず、あなたがどのくらいこの調査に注意を払っているかを確認します。 以下の「回答を開始する」は選択せずに、「→」ボタンをクリックして下さい。	There are a lot of questions, but each one needs to be read and answered carefully. First, let us check how much you are paying attention to this survey. Please click the "→" button instead of selecting "Start Answer" below.	Ti preghiamo di leggere e rispondere con attenzione ad ogni domanda. Come verifica del tuo livello di attenzione, clicca sul tasto "→" e non su "Inizia il questionario".	下去您将回答大量的问题，每一题都需要您认真作答。因此我们将先进行一个测试，来确认您是否已将注意力集中在即将开始的调研上。下面，请不要选择“开始回答”，而是按下“下一页”按钮。
		DQS	"X" in the questionnaire should be either of 1–7	ここでは必ず「X」を選択してください	You must select "X" here.	Seleziona "X" qui.	本题请选择“X”作为回答。
		country	1=Japan, 2=The United States, 3=The United Kingdom, 4=Italy, 5=China
		BJD1	"strongly disagree (1)" to "strongly agree (6)"	新型コロナウイルスに感染した人がいたとしたら、それは本人のせいだと思う	If anyone had been infected with the new coronavirus, I think it was their fault.	Se una persona è stata infettata dal nuovo coronavirus, penso che sia stata colpa sua.	如果有人感染新冠肺炎，那也是他们自己的责任。
		BJD2	"strongly disagree (1)" to "strongly agree (6)"	新型コロナウイルスに感染する人は、自業自得だと思う	I think anyone who gets infected with the new coronavirus got what they deserved.	Penso che se una persona è stata infettata dal nuovo coronavirus, abbia ottenuto ciò che meritava.	感染新冠肺炎的人是自作自受。
		HRR1	"strongly disagree (1)" to "strongly agree (7)"	非常時には、政府からの移動の自由を制限する要請に応えるのが良い	In emergencies, it is better to follow government requests for restrictions on freedom of movement.	In situazioni di emergenza, è meglio seguire le disposizioni del governo in materia di restrizioni alla libera circolazione.	在非常时期，应该响应政府提出的限制移动的号召。
		HRR2	"strongly disagree (1)" to "strongly agree (7)"	非常時には、政府からの言論の自由を制限する要請に応えるのが良い	In emergencies, it is better to follow government requests for restrictions on freedom of speech.	In situazioni di emergenza, è meglio seguire le disposizioni del governo in materia di restrizioni alla libertà di parola.	在非常时期，应该相应政府提出的限制言论的号召。
		HRR3	"strongly disagree (1)" to "strongly agree (7)"	非常時には、政府の外出制限方針に反して外出した人は法律によって罰されるべきである	In emergencies, anyone who goes out against government lockdown policy should be punished by law.	In situazioni di emergenza, chi esce di casa violando le disposizioni del governo deve essere punito dalla legge.	在非常时期，违反政府限制外出的方针的人应该受到法律制裁。
		HRR4	"strongly disagree (1)" to "strongly agree (7)"	非常時には、政府の方針に反する言論は法律によって罰されるべきである	In emergencies, speech contrary to government policy should be punished by law.	In situazioni di emergenza, l'espressione di opinioni contrarie all'azione di governo deve essere punita dalla legge.	在非常时期，违反政府方针的言论应该受到法律制裁。
		HRR5	"strongly disagree (1)" to "strongly agree (7)"	非常時には、他の人たちが政府の方針に従っているか、一人ひとりが見張るべきである	In emergencies, every citizen should watch over to ensure that government policies are respected.	In situazioni di emergenza, ogni cittadino deve vigilare affinché siano rispettate le disposizioni del governo.	在非常时期，人们应该监视他人有没有按照政府方针行动。
		HRR6	"strongly disagree (1)" to "strongly agree (7)"	非常時には、他の人たちを政府の方針に従わせるために、個々人の判断で行動を起こして良い	In emergencies, every citizen can autonomously take action to ensure that government policies are respected.	In situazioni di emergenza, ogni cittadino può agire di propria iniziativa per fare rispettare le disposizioni del governo.	在非常时期，每个人都应该自发采取行动，以促使他人按照政府方针行动。
		gender	1=Man，2=Woman，3=Don't answer	あなたの性別	What is your gender?	Qual è il tuo sesso?	请选择您的性别。
		age		あなたの年齢	What is your age?	Quanti anni hai?	请回答您的年龄。
		academic career	Options depend on the coutnries. * represents a university degree or higher.	あなたが最後に卒業した学校を教えて下さい。現に在学している場合は、その学校をお答え下さい。 1. 小学校／中学校 2. 高校 3. 短大／高専（高等専門学校）／専門学校 *4. 大学／大学院	The United States What is the last school that you went to (or you’re now going to)? 1 Elementary / Junior-high 2 High school 3 College (2 years) / Vocational *4 University / Graduate school The United Kingdom What is the last school that you went to (or you’re now going to)? 1. No formal qualifications 2. Secondary education (e.g. GCSE) 3. High school diploma/A-levels 4. Technical/community coll…	IT Qual è l'ultima scuola che hai frequentato (o che stai frequentando)? 1. Nessuna formazione scolastica 2. Scuola elementare incompleta 3. Scuola elementare completa 4. Scuola media inferiore e avviamento professionale 5. Scuola professionale completa 6. Secondaria superiore incompleta 7. Secondaria superiore completa *8. Livello universitario, senza titolo (università interrotta) *9. Livello u…	CN 请回答您的最高学历。如果您还在读书，请选择您正在就读的学校的类型。 1. 小学 2. 初中 3. 高中（含中专） *4. 大学（含大专） *5. 硕士及以上
		family	"Family_1," "family_2," and "family_3" indicate whether the respondent chose options 1, 2, and 3, respectively. 0 = no selection, 1 = selection.	あなたの同居しているご家族に「中学生以下の子ども」や「65歳以上の高齢者」はいらっしゃいますか。両方いらっしゃれば両方とも選択して下さい。 1 中学生以下の子ども 2 65歳以上の高齢者 3 上記のような家族とは同居していない	Do you have any "children under junior high school age" or "elderly people over 65" in your family? If you have both, please select both. 1 Children under junior high school age 2 Elderly people over 65 3 I don't live with them.	Nella tua famiglia, vivi con bambini che frequentano al massimo la scuola media o persone oltre i 65 anni di età? Nel caso entrambe le opzioni siano applicabili, seleziona entrambe le caselle. 1 Bambini che frequentano al massimo la scuola media 2 Persone oltre i 65 anni di età 3 Non vivo insieme a loro	您是否与“中学生以下的孩子”或“65岁以上的老人”同住？如果两者都有，请同时选择双方。 1 中学生以下的孩子 2 65岁以上的老人 3 我不与上述人同住
